# Supplementary material for: A comparison of individual versus community influences on youth smoking behaviours: a cross-sectional observational study
Source: PubMed Central journal article supplement — BMJ Open. 2012 Sep 1;2(5):e000767. doi: 10.1136/bmjopen-2011-000767 (PMC3437428; doi:10.1136/bmjopen-2011-000767), 2012-09-01
Supplement: bmjopen-2011-000767.draft_revisions.pdf [file bmjopen-2011-000767.draft_revisions.pdf]

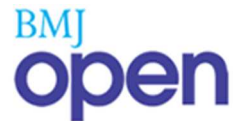

**A comparison of individual versus community influences on youth smoking behaviors**

|                                 |                                                                                                                                                                                                                                                                                                                                                                                                                                                                                                                                                                                       |
|---------------------------------|---------------------------------------------------------------------------------------------------------------------------------------------------------------------------------------------------------------------------------------------------------------------------------------------------------------------------------------------------------------------------------------------------------------------------------------------------------------------------------------------------------------------------------------------------------------------------------------|
| Journal:                        | <i>BMJ Open</i>                                                                                                                                                                                                                                                                                                                                                                                                                                                                                                                                                                       |
| Manuscript ID:                  | bmjopen-2011-000767                                                                                                                                                                                                                                                                                                                                                                                                                                                                                                                                                                   |
| Article Type:                   | Research                                                                                                                                                                                                                                                                                                                                                                                                                                                                                                                                                                              |
| Date Submitted by the Author:   | 06-Mar-2012                                                                                                                                                                                                                                                                                                                                                                                                                                                                                                                                                                           |
| Complete List of Authors:       | Adachi-Mejia, Anna; Dartmouth Medical School, Pediatrics; Norris Cotton Cancer Center, Cancer Control Research Program<br>Carlos, Heather; Dartmouth-Hitchcock Norris Cotton Cancer Center, Berke, Ethan; The Dartmouth Institute of Health Policy and Clinical Practice, ; Norris Cotton Cancer Center, Cancer Control Research Program<br>Tanski, Susanne; Norris Cotton Cancer Center, Cancer Control Research Program; Dartmouth Medical School, Pediatrics<br>Sargent, James; Norris Cotton Cancer Center, Cancer Control Research Program; Dartmouth Medical School, Pediatrics |
| <b>Primary Subject Heading</b>: | Public health                                                                                                                                                                                                                                                                                                                                                                                                                                                                                                                                                                         |
| Secondary Subject Heading:      | Smoking and tobacco, Health policy, Public health, Paediatrics, Addiction                                                                                                                                                                                                                                                                                                                                                                                                                                                                                                             |
| Keywords:                       | PREVENTIVE MEDICINE, Community child health < PAEDIATRICS, PUBLIC HEALTH                                                                                                                                                                                                                                                                                                                                                                                                                                                                                                              |
|                                 |                                                                                                                                                                                                                                                                                                                                                                                                                                                                                                                                                                                       |

SCHOLARONE™  
Manuscripts

only

1  
2  
3 **A comparison of individual versus community influences on youth smoking behaviors: A**  
4 **cross-sectional study**  
5  
6

7 Anna M. Adachi-Mejia, Ph.D.<sup>a,b,c,d</sup>  
8 Heather A. Carlos<sup>b</sup>  
9 Ethan M. Berke, M.D., M.P.H.<sup>c,d,e</sup>  
10 Susanne E. Tanski, M.D.<sup>a,b,c</sup>  
11 James D. Sargent, M.D.<sup>a,b,c</sup>  
12  
13  
14  
15

16 <sup>a</sup>Pediatrics, Dartmouth Medical School, Lebanon, NH, USA

17 <sup>b</sup>Dartmouth-Hitchcock Norris Cotton Cancer Center, Lebanon, NH, USA

18 <sup>c</sup>Cancer Control Research Program, Norris Cotton Cancer Center, Lebanon, NH, USA

19 <sup>d</sup>The Dartmouth Institute of Health Policy and Clinical Practice, Lebanon, NH, USA

20 <sup>e</sup>Community & Family Medicine, Dartmouth Medical School, Hanover, NH, USA  
21  
22

23  
24 Correspondence concerning this article should be addressed to: Anna M. Adachi-Mejia, Ph.D.,  
25 HB 7925, Cancer Control Research Program, Dartmouth-Hitchcock Norris Cotton Cancer  
26 Center, Lebanon, NH 03756, USA; Tel (603) 653-6124, Fax (603) 653-9090, E-mail:  
27 [anna.adachi-mejia@dartmouth.edu](mailto:anna.adachi-mejia@dartmouth.edu)  
28

29 Contributorship statement: All authors 1) made substantial contributions to conception and  
30 design, acquisition of data, or analysis and interpretation of data; 2) drafted the article or revised  
31 it critically for important intellectual content; 3) approved of the final version to be published.  
32  
33

34 Words: 3001

35 Tables: 4

36 Figures: 0  
37  
38

39 Key words: Smoking, youth, tobacco outlet density, policy, GIS  
40  
41  
42  
43  
44  
45  
46  
47  
48  
49  
50  
51  
52  
53  
54  
55  
56  
57  
58  
59  
60

## ABSTRACT

**Objectives** To compare individual versus community risk factors for adolescent smoking.

**Design** A cross-sectional observational study.

**Setting** National telephone survey.

**Participants** 3646 US adolescents aged 13-18 years in 2007 recruited through a random digital survey; 50% female.

**Outcome measures** Ever tried smoking and smoking intensity.

**Results** Approximately one-third (35.6%, N=1297) had tried smoking. Neither tobacco outlet density nor proximity were associated with tried smoking or smoking intensity in adjusted models. In contrast, age (OR = 1.23, 95% CI 1.16, 1.31), lower socioeconomic status (OR = 0.82, 95% CI 0.74, 0.91), sibling smoking (OR=2.13, 95% CI 1.75, 2.59), friend smoking (OR = 2.60, 95% CI 2.19, 3.10 for some and OR = 7.01, 95% CI 5.05,9.74 for most), movie smoking exposure (OR = 2.66, 95% CI 1.95, 3.63), team sports participation (OR = 0.69, 95% CI 0.54, 0.89) and sensation seeking (OR = 7.72, 95% CI 5.26, 11.34) were associated with trying smoking. Among experimental smokers, age (OR = 1.33, 95% CI 1.20, 1.48), minority status (OR = 0.42, 95% CI 0.22, 0.81 for Black; OR = 0.50, 95% CI 0.30, 0.83 for Hispanic), friend smoking (OR = 6.38, 95% CI 3.29,12.39 for some; OR = 32.98, 95% CI 16.43,66.19 for most), team sports participation (OR = 0.46, 95% CI 0.30, 0.72), and sensation seeking (OR = 6.89, 95% CI 3.42, 13.88) were associated with smoking intensity.

**Conclusions** Public health campaigns to prevent and reduce youth smoking should emphasize individual risk factors for smoking rather than tobacco outlet density and proximity. The finding does not rule out that other community risk factors, such as neighborhood smoking or social capital, may be important.

## INTRODUCTION

Preventing adolescent smoking is a key public health imperative. Individual risk factors for youth smoking include exposure to tobacco marketing,[1] exposure to smoking in entertainment media,[2] personality factors such as sensation seeking,[3, 4] and extracurricular activities such as team sports participation.[5] Approaches to preventing youth smoking risk have included interventions to minimize adolescents' responsiveness to these risk factors[6] and policies to minimize adolescent's exposure to them.[7]

In addition to the influence of individual risk factors, community influences, such as access to tobacco outlets, may play a role in youth smoking. For example, frequent exposure to tobacco outlets[8] and tobacco outlet density[9, 10] has been associated with youth smoking. Owing to these community-level influences, Cohen et al. have proposed policies to limit tobacco outlet density to reduce youth smoking.[11]

When jointly considered, which has the greater potential to influence youth smoking – individual or community level factors? The evidence for community influence is still emerging; studies to date have been limited to regions, have not controlled for individual characteristics outside of sociodemographics, and have applied varying approaches to density measurement.[10, 12-14] In addition, community influences, such as tobacco outlet density and proximity, could be confounded by social influences like sibling and friend smoking.

1  
2  
3 Another area to consider in the context of tobacco outlet density and proximity is their  
4  
5 association with neighborhood characteristics that may also pose risk. Here the evidence is  
6  
7 mixed, but with many studies showing an association between tobacco outlet density and  
8  
9 neighborhoods characterized by high percentages of minorities[10, 13, 15-18] and low  
10  
11 income,[10, 13, 16-18] although one study found a surprising relationship between tobacco  
12  
13 outlet density and higher median income in adults.[15] Paul et al. found that tobacco outlet  
14  
15 proximity was not associated with socioeconomic status in adults,[19] whereas West et al. found  
16  
17 that proximity was associated with neighborhood poverty in youth.[14] Thus, the finding that  
18  
19 tobacco outlet density is related to youth smoking could also be confounded by other community  
20  
21 factors.  
22  
23  
24  
25  
26  
27  
28

29 This study examines the role of access to tobacco outlets compared to individual risk factors on  
30  
31 youth smoking. It is the first to consider the role of community-level factors on adolescent  
32  
33 smoking nationwide, the first to jointly examine individual risk factors with community-level  
34  
35 factors, and the first to examine these factors in the context of individual and community  
36  
37 measures of race and ethnicity. The intent of this work is to inform policies related to tobacco  
38  
39 control efforts directed at youth.  
40  
41  
42  
43  
44

## 45 **METHODS**

### 46 **Theoretical Framework**

47  
48 This study is guided by Bronfenbrenner's Ecological Systems Theory,[20-22] which posits that  
49  
50 development, health and well-being are situated within and shaped by the interactions that occur  
51  
52 between the individual and the four systems: microsystem (immediate environment),  
53  
54  
55  
56  
57  
58  
59  
60

1  
2  
3 mesosystem (connections between immediate environments, e.g., tobacco outlet density and  
4 proximity), exosystem (indirect external environmental settings), and macrosystem (larger  
5 cultural context).[20-22] This theory suggests that empirical approaches to studying risk of  
6 tobacco behavior should include individual and community-level variables. The individual-level  
7 variables included in this study are all well-established risk factors for smoking: gender,  
8 race/ethnicity, socioeconomic status, friend smoking, sibling smoking, exposure to smoking in  
9 movies, team sports participation, and the personality characteristic of sensation seeking. The  
10 community-level variables include tobacco outlet density, distance to closest tobacco outlet,  
11 proportion population Black, proportion population Hispanic, and proportion of families with  
12 income below the poverty level.  
13  
14  
15  
16  
17  
18  
19  
20  
21  
22  
23  
24  
25  
26  
27  
28

### 29 **Sample Recruitment**

30  
31 A detailed description of the recruitment methods for study participants has been published  
32 previously.[23] Briefly, between June and October 2003, 6522 U.S. adolescents aged 10-14  
33 years were recruited through a random digit-dial telephone survey, which captured a  
34 representative sample of U.S. adolescents. Five follow-up surveys were conducted at 8-month  
35 intervals. This study involves the fifth follow-up survey conducted in the fall of 2007.  
36  
37 Interviewers successfully contacted 3055 (47%) of the original 6522 adolescents for this round.  
38  
39 Loss to follow up was higher among Blacks, older adolescents, those of lower socioeconomic  
40 status, baseline smokers and higher sensation seekers. To address the minority attrition, a sample  
41 of 598 Black adolescents (in the same age range) were recruited through lists of residential  
42 numbers for U.S. census tracts for which African-Americans represented 20% or more of the  
43 population, resulting in available sample of 3653 for this study. Parental consent and adolescent  
44  
45  
46  
47  
48  
49  
50  
51  
52  
53  
54  
55  
56  
57  
58  
59  
60

1  
2  
3 assent were required for participation. The study was approved by the Committee for the  
4  
5 Protection of Human Subjects at Dartmouth Medical School. The 3653 subjects lived in 3456  
6  
7 unique census tracts, of which the majority (95.5%) contained only 1 subject; 144 tracts (4.2%)  
8  
9 contained two subjects, and 11 tracts (0.3%) contained three subjects. When possible, the  
10  
11 adolescent's location was geocoded to their home street address (N=3167) or to their ZIP code  
12  
13 centroid (N=479), resulting in a final sample size of N=3646 for this study.  
14  
15  
16  
17  
18  
19

### 20 **Outcome Variables**

21  
22 *Ever tried smoking:* Respondents were asked, "Have you ever tried smoking a cigarette, even  
23  
24 just a puff? (Yes, No)" which was used to employ branching logic – respondents who answered  
25  
26 yes were categorized as ever smokers and then asked about smoking intensity.  
27  
28  
29

30  
31  
32 *Smoking intensity:* Among ever smokers, assessment of smoking intensity was based on a  
33  
34 composite measure using three items that assessed past 30-day smoking (alpha = 0.87): "During  
35  
36 the past 30 days, on how many days did you smoke cigarettes?" (none, 1-10 days, 11-29 days, or  
37  
38 every day); "During the past 30 days, on the weekdays that you smoked, how many cigarettes  
39  
40 did you usually smoke per day?" (1 to 5, 6 to 10, 11 to 20, more than 20); "During the past 30  
41  
42 days, on the weekends that you smoked, how many cigarettes did you usually smoke per day?"  
43  
44 (1 to 5, 6 to 10, 11 to 20, more than 20).  
45  
46  
47  
48  
49

### 50 **Individual risk factors**

1  
2  
3 *Sociodemographics:* Individual measures of age, race and ethnicity were included.  
4

5 Socioeconomic status was assessed using a standardized composite measure based on parent  
6 reports of their own education and household income ( $\alpha = 0.69$ ).  
7  
8  
9

10  
11  
12 *Sibling smoking:* Sibling smoking was assessed with the question, “Do any of your older  
13 brothers or sisters smoke cigarettes?”  
14  
15

16  
17  
18 *Friend smoking:* Friend smoking was assessed with the question, “How many of your friends  
19 smoke cigarettes? Your choices are none, some, or most.”  
20  
21  
22  
23

24  
25  
26  
27 *Exposure to movie smoking:* Adolescents’ exposure to movie smoking was estimated using the  
28 Beach method[24] for top U.S. box-office hits from 2000-2006 ( $n = 384$ ). Movies were content-  
29 coded for smoking using previously validated methods.[24] Each adolescent survey was  
30 programmed to randomly select 50 movie titles from the larger pool of 384 movies; respondents  
31 were asked whether they had ever seen each movie title. To create a measure of exposure to  
32 movie smoking, the number of smoking occurrences in films each adolescent had seen from  
33 his/her unique list of 50 movies were summed. A proportion was generated by dividing this  
34 number by the number of smoking occurrences that the adolescent would have seen had all 50  
35 movies in the unique list been viewed and this proportion was multiplied by the number of  
36 smoking occurrences in the entire parent sample of 384 movies.  
37  
38  
39  
40  
41  
42  
43  
44  
45  
46  
47  
48  
49

50  
51  
52  
53 *Team sports participation:* Team sports participation was assessed with a single item, “Now I’d  
54 like you to think about all the sports teams you played on during the past 12 months, including  
55  
56  
57  
58  
59  
60



1  
2  
3 all school, community or recreational teams. How many sports teams did you play on in the past  
4  
5 12 months?" The answer was a continuous measure, based on the adolescent's response.  
6  
7  
8  
9

10 *Sensation seeking:* Sensation seeking propensity was assessed using a short 5-item measure: "I  
11 would like to explore strange places," "I like to do frightening things," "I like new and exciting  
12 experiences, even if I have to break the rules," "I like to listen to loud music," "I like to do  
13 dangerous things." Each of these items had the following response categories for each statement:  
14 Strongly Agree, Disagree, Agree, Strongly Agree. These items had a Cronbach's alpha ( $\alpha$ ) of  
15  
16 0.70.  
17  
18  
19  
20  
21  
22  
23  
24  
25  
26

## 27 **Community influences**

28  
29  
30  
31 *Tobacco outlets:* To obtain a national dataset for tobacco outlets, we reviewed North American  
32 Industry Classification System (NAICS) codes and selected establishments that were likely to  
33 sell tobacco products. The Office of Management and Budget (OMB) developed NAICS for use  
34 by Federal statistical agencies in classifying all business establishments based on their primary  
35 activity. We selected the 306,695 establishments coded as tobacco stores, grocery stores, gas  
36 stations, and convenience stores and obtained geocoded data from the NAICS Association.  
37  
38 Although some businesses classified as department stores, liquor stores, and pharmacies may sell  
39 tobacco as well (e.g. Wal-Mart, Costco, CVS), they were not classified as tobacco outlets  
40 because they also include many stores that do not sell tobacco (e.g. Sears, Dollar Stores, hospital  
41 pharmacies), and the NAICS categories do not allow differentiation between sub-classes of  
42 stores that do or do not sell tobacco.  
43  
44  
45  
46  
47  
48  
49  
50  
51  
52  
53  
54  
55  
56  
57  
58  
59  
60

1  
2  
3  
4  
5  
6 *Tobacco outlet density using adaptive bandwidth kernel density estimation:* A nationwide  
7  
8 density surface of the tobacco outlets using adaptive bandwidth kernel density estimation  
9  
10 (KDE)[25, 26] and the LandScan™ Global Population Database[27] was produced. Adaptive  
11  
12 bandwidth KDE accounts for the underlying population density by limiting the bandwidth of  
13  
14 each tobacco outlet to the surrounding population of 1000 people. Setting a limit constrains the  
15  
16 influence of a single outlet to a small spatial extent where the population density is high (urban  
17  
18 areas) while in rural areas the reach of the tobacco outlet is geographically larger. For sparsely  
19  
20 populated regions, the bandwidth of each tobacco outlet was limited to a 25 km radius to prevent  
21  
22 the density calculation from expanding to a spatially unreliable distance. The resultant density  
23  
24 surface covers the continental U.S. with pixels that are ~0.5 miles on each side and have a  
25  
26 density value in units of tobacco outlets per 1000 people. Each adolescent was assigned the  
27  
28 density value based on the pixel at their geocoded location.  
29  
30  
31  
32  
33  
34  
35

36 *Distance to closest tobacco outlet:* ArcGIS Network Analyst (ESRI, Redlands, CA) was used to  
37  
38 compute the distance along the road network from the adolescent's geocoded location to the  
39  
40 closest tobacco outlet. Street data was obtained from the 2008 edition of StreetMap North  
41  
42 America,[28] which was created in 2005 and based on the ground conditions in 2003. Other  
43  
44 methods of measuring proximity were also considered, including Euclidian distance and driving  
45  
46 time. A sensitivity analysis demonstrated no difference between methods in the final model (data  
47  
48 not shown).  
49  
50  
51  
52  
53  
54  
55  
56  
57  
58  
59  
60

1  
2  
3  
4  
5  
6  
7  
8  
9  
10  
11  
12  
13  
14  
15  
16  
17  
18  
19  
20  
21  
22  
23  
24  
25  
26  
27  
28  
29  
30  
31  
32  
33  
34  
35  
36  
37  
38  
39  
40  
41  
42  
43  
44  
45  
46  
47  
48  
49  
50  
51  
52  
53  
54  
55  
56  
57  
58  
59  
60

*Census tract measures of race/ethnicity and poverty:* Community characteristics that might be confounders for tobacco outlet density and proximity were included. Using the U.S. Census 2000 data, the proportion population Black, the proportion population Hispanic, and the proportion of families with income below the poverty level for each adolescent's census tract were calculated.

### Statistical analysis

Pearson correlation coefficients were used to describe the association among community influences. Multiple logistic regression was used to assess the association between individual and environmental risk factors and ever tried smoking, and multiple ordered logistic regression was used to assess the odds of being higher on the frequency of smoking scale among smokers.

Because the majority of the sample resided in unique census tracts, it was not necessary to fit hierarchical models. Instead, the environmental variables were entered as individual-level risk indicators of the adolescent's environment. Some variables (movie smoking exposure, tobacco outlet density, distance to the closest outlet, proportion population Black, proportion population Hispanic, and proportion families with incomes below the poverty level) were skewed right. In order to limit the influence of high outliers, values higher than the 95<sup>th</sup> percentile were trimmed to the 95<sup>th</sup> percentile. Additionally, to allow a comparison of effect size among the variables, friend smoking, movie smoking exposure, tobacco outlet density, proportion of families with incomes below the poverty level, and sensation seeking were rescaled so that the lowest value was 0 and the highest value was 1. This scaling procedure allowed a comparison between the dose-response between individual/community measures and adolescent smoking. Ninety-five percent confidence intervals were assessed based on two-tailed hypothesis assumptions.

## RESULTS

*Individual and community characteristics:* Table 1 describes the characteristics of the adolescents and their correlation with the two smoking outcomes. Thirty-six percent had tried smoking, and this percentage increased across age categories from 18 to 56 percent in 13 and 18 year olds respectively. Among smokers, mean smoking intensity also increased with age. There were no large differences in tried smoking prevalence across gender or race, but smoking intensity was much lower among Black and Hispanic smokers compared with Whites and those of mixed race. The correlation between community variables and smoking was an order of magnitude lower than correlations with individual characteristics. Whereas tobacco outlet density was positively correlated with smoking onset, it was negatively correlated with smoking intensity. The largest correlation for community predictors was -0.13, between proportion population Black and smoking intensity, also consistent with lower smoking intensity among minorities at the individual level.

Table 1. Individual and community risk factors and smoking outcomes (N=3646).

| Variable                                 | n     | Proportion of Sample | Tried Smoking (mean) | Smoking Intensity (mean) |
|------------------------------------------|-------|----------------------|----------------------|--------------------------|
| <b>Individual descriptors</b>            |       |                      |                      |                          |
| <b>Categorical</b>                       |       |                      |                      |                          |
| Age                                      |       |                      |                      |                          |
| 13                                       | 114   | 0.03                 | 0.18                 | 0.30                     |
| 14                                       | 722   | 0.20                 | 0.24                 | 0.23                     |
| 15                                       | 827   | 0.23                 | 0.29                 | 0.34                     |
| 16                                       | 804   | 0.22                 | 0.37                 | 0.39                     |
| 17                                       | 769   | 0.21                 | 0.43                 | 0.51                     |
| 18                                       | 410   | 0.11                 | 0.56                 | 0.81                     |
| Gender                                   |       |                      |                      |                          |
| Male                                     | 1,810 | 0.50                 | 0.38                 | 0.49                     |
| Female                                   | 1,836 | 0.50                 | 0.34                 | 0.43                     |
| Race/ethnicity                           |       |                      |                      |                          |
| White                                    | 2,091 | 0.57                 | 0.36                 | 0.59                     |
| Black                                    | 818   | 0.22                 | 0.32                 | 0.20                     |
| Hispanic                                 | 481   | 0.13                 | 0.41                 | 0.29                     |
| Mixed race/other                         | 256   | 0.07                 | 0.38                 | 0.57                     |
| Sibling smokes                           |       |                      |                      |                          |
| No                                       | 2,924 | 0.80                 | 0.31                 | 0.43                     |
| Yes                                      | 720   | 0.20                 | 0.56                 | 0.55                     |
| Friend smoking                           |       |                      |                      |                          |
| None                                     | 1,615 | 0.44                 | 0.17                 | 0.05                     |
| Some                                     | 1,711 | 0.47                 | 0.45                 | 0.35                     |
| Most                                     | 316   | 0.09                 | 0.78                 | 1.29                     |
| Ever smoked                              |       |                      |                      |                          |
| No                                       | 2,349 | 0.64                 |                      |                          |
| Yes                                      | 1,297 | 0.36                 |                      |                          |
| <b>Continuous</b>                        |       |                      |                      |                          |
| Smoking Intensity (among smokers)        | 0     | 0,1                  |                      |                          |
| Socioeconomic status                     | 0.08  | -0.65,0.65           | -0.12                | -0.03                    |
| Friend Smoking                           | 2     | 1,2                  | 0.21                 | 0.45                     |
| Movie smoking exposure                   | 558   | 285,883              | 0.21                 | 0.04                     |
| Team sports participation                | 1     | 0,2                  | -0.08                | -0.14                    |
| Sensation seeking                        | 12    | 10,14                | 0.31                 | 0.25                     |
| <b>Community descriptors</b>             |       |                      |                      |                          |
| Tobacco outlet density (per 1000 people) | 0.34  | 0.03,1.12            | 0.03                 | -0.05                    |

1  
2  
3  
4  
5  
6  
7  
8  
9  
10  
11  
12  
13  
14  
15  
16  
17  
18  
19  
20  
21  
22  
23  
24  
25  
26  
27  
28  
29  
30  
31  
32  
33  
34  
35  
36  
37  
38  
39  
40  
41  
42  
43  
44  
45  
46  
47  
48  
49  
50  
51  
52  
53  
54  
55  
56  
57  
58  
59  
60

|                                 |      |           |       |       |
|---------------------------------|------|-----------|-------|-------|
| Distance (mi) to nearest outlet | 0.59 | 0.29,1.19 | 0.001 | 0.03  |
| Proportion population Black     | 0.03 | 0.01,0.21 | -0.03 | -0.13 |
| Proportion population Hispanic  | 0.03 | 0.01,0.09 | 0.02  | -0.08 |
| Poverty <sup>a</sup>            | 0.06 | 0.03,0.11 | 0.02  | -0.07 |

---

<sup>a</sup>Proportion of families with income below the poverty level

For peer review only

The community characteristics were also correlated with each other. Higher tobacco outlet density was associated with larger proportions of families with incomes below the poverty level, proportion of the population that was Black and Hispanic (Table 2). Tobacco outlet density decreased as distance to nearest outlet increased (correlation = -0.32), but the relationship was not linear. There was a wide range for distance to closest outlet among adolescents living in low tobacco outlet density areas, and a wide range of densities among adolescents living close to an outlet, justifying the consideration of both factors as being independently associated with smoking behavior.

Table 2. Correlation among the environmental descriptors.

| Environmental descriptor                   | Correlation |       |       |      |      |
|--------------------------------------------|-------------|-------|-------|------|------|
|                                            | 1           | 2     | 3     | 4    | 5    |
| 1 Tobacco outlet density (per 1000 people) | 1.00        |       |       |      |      |
| 2 Distance (mi) to nearest outlet          | -0.32       | 1.00  |       |      |      |
| 3 Proportion population Black              | 0.27        | -0.17 | 1.00  |      |      |
| 4 Proportion population Hispanic           | 0.26        | -0.13 | -0.10 | 1.00 |      |
| 5 Poverty <sup>a</sup>                     | 0.39        | -0.12 | 0.52  | 0.38 | 1.00 |

<sup>a</sup>Proportion of families with income below the poverty level

*Relation with ever tried smoking:* Being male, being Hispanic, having sibling(s) who smoke, being of lower socioeconomic status, having friends who smoke, being older, having more exposure to movie smoking, not playing team sports, being higher in sensation seeking, and living in a neighborhood with higher tobacco outlet density were all significantly associated with ever trying smoking in the unadjusted models (Table 3). Two types of multivariate models were built to test these associations with ever trying smoking. In the first, only community-level factors were included; it showed a significant inverse association with proportion of the population that was Black and a significant association with census tract poverty. In the second

1  
2  
3 multivariate model, individual characteristics were added, which substantially improved model  
4  
5 fit. Whereas most individual characteristics (sibling smoking, socioeconomic status, friend  
6  
7 smoking, age, movie smoking exposure, team sports participation, and sensation seeking) were  
8  
9 significantly associated with ever trying smoking in the second model, none of the community  
10  
11 characteristics were significantly associated with ever trying smoking. Notably, the coefficient  
12  
13 for tobacco outlet density changed little across models and, although small, remained close to  
14  
15 statistical significance, in contrast to the other community predictors.  
16  
17  
18  
19  
20  
21  
22  
23  
24  
25  
26  
27  
28  
29  
30  
31  
32  
33  
34  
35  
36  
37  
38  
39  
40  
41  
42  
43  
44  
45  
46  
47  
48  
49  
50  
51  
52  
53  
54  
55  
56  
57  
58  
59  
60



Table 3. Crude and multivariate association with ever tried smoking.

| Variable                                                       | Crude Odds Ratio | Community only <sup>a</sup><br>n = 3,621 |            | All variables <sup>b</sup><br>n = 3,543 |            |
|----------------------------------------------------------------|------------------|------------------------------------------|------------|-----------------------------------------|------------|
|                                                                |                  | Adj Odds Ratio                           | 95% CI     | Adj Odds Ratio                          | 95% CI     |
| Individual characteristics                                     |                  |                                          |            |                                         |            |
| Categorical                                                    |                  |                                          |            |                                         |            |
| Gender                                                         |                  |                                          |            |                                         |            |
| Male                                                           | Ref              |                                          |            |                                         |            |
| Female                                                         | 0.84*            |                                          |            | 1.03                                    | 0.88,1.21  |
| Race/ethnicity                                                 |                  |                                          |            |                                         |            |
| White                                                          | Ref              |                                          |            |                                         |            |
| Black                                                          | 0.85             |                                          |            | 0.85                                    | 0.62,1.18  |
| Hispanic                                                       | 1.24*            |                                          |            | 1.18                                    | 0.88,1.59  |
| Mixed race/other                                               | 1.13             |                                          |            | 1.08                                    | 0.77,1.50  |
| Sibling smokes                                                 |                  |                                          |            |                                         |            |
| No                                                             | Ref              |                                          |            |                                         |            |
| Yes                                                            | 2.85*            |                                          |            | 2.13*                                   | 1.75,2.59  |
| Friend smoking                                                 |                  |                                          |            |                                         |            |
| None                                                           | Ref              |                                          |            |                                         |            |
| Some                                                           | 3.93*            |                                          |            | 2.60*                                   | 2.19,3.10  |
| Most                                                           | 17.14*           |                                          |            | 7.01*                                   | 5.05,9.74  |
| Continuous                                                     |                  |                                          |            |                                         |            |
| Age (for each additional year)                                 | 1.39*            |                                          |            | 1.23*                                   | 1.16,1.31  |
| Socioeconomic status                                           | 0.76*            |                                          |            | 0.82*                                   | 0.74,0.91  |
| Movie smoking exposure                                         | 5.14*            |                                          |            | 2.66*                                   | 1.95,3.63  |
| Team sports participation                                      | 0.59*            |                                          |            | 0.69*                                   | 0.54,0.89  |
| Sensation seeking                                              | 20.71*           |                                          |            | 7.72*                                   | 5.26,11.34 |
| Community characteristics                                      |                  |                                          |            |                                         |            |
| Tobacco outlet density (per 1000 people)                       | 1.30*            | 1.28                                     | 0.97,1.70  | 1.27                                    | 0.92,1.76  |
| Tobacco outlet proximity (distance in miles to nearest outlet) | 0.86             | 0.94                                     | 0.69,1.27  | 0.96                                    | 0.67,1.36  |
| Proportion population Black                                    | 0.80             | 0.59*                                    | 0.42,0.83  | 0.93                                    | 0.53,1.61  |
| Proportion population Hispanic                                 | 1.47             | 0.87                                     | 0.49,1.55  | 0.88                                    | 0.41,1.87  |
| Poverty <sup>c</sup>                                           | 2.06             | 3.66*                                    | 1.07,12.42 | 0.74                                    | 0.17,3.22  |

\*p&lt;0.05

<sup>a</sup>Pseudo R<sup>2</sup> = 0.003<sup>b</sup>Pseudo R<sup>2</sup> = 0.20<sup>c</sup>Proportion of families with income below the poverty level

1  
2  
3  
4  
5  
6 *Relation with smoking intensity:* Similar multivariate models were built for smoking intensity  
7  
8 among the experimental smokers (Table 4). Minority status, sibling smoking friend smoking,  
9  
10 age, team sports participation, sensation seeking, proportion population Black and Hispanic, and  
11  
12 poverty, were all associated with smoking intensity at the bivariate level. In the community-only  
13  
14 multivariate model, proportion population Black and Hispanic retained a significant inverse  
15  
16 relation with smoking intensity. In the full model, friend smoking, age, and sensation seeking  
17  
18 were all associated with higher intensity and being Black or Hispanic and participating in team  
19  
20 sports associated with lower intensity. None of the community characteristics retained a  
21  
22 statistically significant association with smoking intensity.  
23  
24  
25  
26  
27  
28  
29  
30  
31  
32  
33  
34  
35  
36  
37  
38  
39  
40  
41  
42  
43  
44  
45  
46  
47  
48  
49  
50  
51  
52  
53  
54  
55  
56  
57  
58  
59  
60

Table 4. Crude and multivariate association with smoking intensity among experimental smokers.

| Variable                                                       | Crude Odds Ratio | Community only <sup>a</sup><br>n = 1,289 |            | All variables <sup>b</sup><br>n = 1,263 |             |
|----------------------------------------------------------------|------------------|------------------------------------------|------------|-----------------------------------------|-------------|
|                                                                |                  | Adj Odds Ratio                           | 95% CI     | Adj Odds Ratio                          | 95% CI      |
| Individual characteristics                                     |                  |                                          |            |                                         |             |
| Categorical                                                    |                  |                                          |            |                                         |             |
| Gender                                                         |                  |                                          |            |                                         |             |
| Male                                                           | Ref              |                                          |            |                                         |             |
| Female                                                         | 0.89             |                                          |            | 0.99                                    | 0.75,1.30   |
| Race/ethnicity                                                 |                  |                                          |            |                                         |             |
| White                                                          | Ref              |                                          |            |                                         |             |
| Black                                                          | 0.29*            |                                          |            | 0.42*                                   | 0.22,0.81   |
| Hispanic                                                       | 0.47*            |                                          |            | 0.50*                                   | 0.30,0.83   |
| Mixed race/other                                               | 0.85             |                                          |            | 0.85                                    | 0.50,1.42   |
| Sibling smokes                                                 |                  |                                          |            |                                         |             |
| No                                                             | Ref              |                                          |            |                                         |             |
| Yes                                                            | 1.33*            |                                          |            | 1.08                                    | 0.81,1.45   |
| Friend smoking                                                 |                  |                                          |            |                                         |             |
| None                                                           | Ref              |                                          |            |                                         |             |
| Some                                                           | 9.11*            |                                          |            | 6.38*                                   | 3.29,12.39  |
| Most                                                           | 57.89*           |                                          |            | 32.98*                                  | 16.43,66.19 |
| Continuous                                                     |                  |                                          |            |                                         |             |
| Age (for each additional year)                                 | 1.37*            |                                          |            | 1.33*                                   | 1.20,1.48   |
| Socioeconomic status                                           | 0.98             |                                          |            | 0.98                                    | 0.82,1.17   |
| Movie smoking exposure                                         | 1.14             |                                          |            | 0.81                                    | 0.49,1.34   |
| Team sports participation                                      | 0.35*            |                                          |            | 0.46*                                   | 0.30,0.72   |
| Sensation seeking                                              | 14.55*           |                                          |            | 6.89*                                   | 3.42,13.88  |
| Community characteristics                                      |                  |                                          |            |                                         |             |
| Tobacco outlet density (per 1000 people)                       | 0.69             | 1.03                                     | 0.62,1.71  | 1.15                                    | 0.66,2.03   |
| Tobacco outlet proximity (distance in miles to nearest outlet) | 1.27             | 0.83                                     | 0.49,1.40  | 0.82                                    | 0.46,1.46   |
| Proportion population Black                                    | 0.23*            | 0.18*                                    | 0.09,0.37  | 0.97                                    | 0.33,2.84   |
| Proportion population Hispanic                                 | 0.24*            | 0.16*                                    | 0.05,0.45  | 0.35                                    | 0.09,1.42   |
| Poverty <sup>c</sup>                                           | 0.06*            | 2.31                                     | 0.25,21.15 | 0.78                                    | 0.05,11.43  |

\*p&lt;0.05

<sup>a</sup>Pseudo R<sup>2</sup> = 0.01<sup>b</sup>Pseudo R<sup>2</sup> = 0.14<sup>c</sup>Proportion of families with income below the poverty level

## DISCUSSION

This study highlights the much stronger association between individual health risk factors and youth smoking behavior compared to community risk factors, with an emphasis on tobacco outlets. The two studies that have examined this to date have suggested that tobacco outlet density (but not proximity) is associated with youth smoking.[10, 12] This study confirms the finding of no relation between tobacco outlet proximity and youth smoking. Also consistent with the two other studies, in the unadjusted model, we saw an association between tobacco outlet density and youth smoking. However, unlike those studies, we also accounted for other individual risk factors for youth smoking. After accounting for these other individual risk factors, the relation with tobacco outlet density was no longer statistically significant. More importantly, community estimates for effect size were small compared to individual risk factors. Thus, regardless of whether the association of tobacco outlet density reached accepted standards for statistical significance, the small effect across a broad range of tobacco outlet densities suggests that policies designed to lower density would have only a small impact on youth smoking onset. In contrast, the association with movie smoking is large enough to suggest that policies aiming to reduce movie exposure could impact youth smoking onset.

Smoking onset is a different behavior with different risk factors compared to progression to higher levels of intensity. Smoking onset tends to be influenced by social risk factors (sibling smoking, friend smoking, movie smoking). Smoking progression continues to be associated with smoking by peers and exposure to tobacco marketing,[29, 30] but is also is predominantly driven by addiction processes[31, 32]. In this study, sensation seeking was a risk factor for both

1  
2  
3 smoking onset and smoking progression, which is consistent with other research.[33] Sensation  
4  
5 seeking level probably captures, in part, biological characteristics that promote experience  
6  
7 seeking[34] and tolerance of deviance,[35] but it may also be associated with higher sensitivity  
8  
9 to the addictive influence of nicotine.[36] Given its large association with both smoking  
10  
11 outcomes in this study, research suggesting that identifying sensation seeking can be used to  
12  
13 either target high risk adolescents,[37] or even that sensation seeking characteristics could be  
14  
15 raised or lowered by environmental circumstances,[38] deserve greater emphasis.  
16  
17  
18  
19

20  
21  
22 Consistent with other studies that have distinguished between smoking onset and  
23  
24 progression,[39] some characteristics were associated with one outcome but not the other.  
25  
26 Exposure to smoking in movies was associated with smoking onset but not smoking intensity,  
27  
28 consistent with some other reports.[29, 30] Minority youth tried smoking at rates similar to  
29  
30 White youth, but minority ever smokers had much lower smoking intensity than Whites. This  
31  
32 finding is not surprising, given that minority adolescents have lower rates of smoking compared  
33  
34 with Whites,[40, 41] with larger temporal declines in smoking among Black adolescents[42] and  
35  
36 lower rates of progression to regular use.[43] Studies of smoking onset have been inconsistent,  
37  
38 with some confirming lower rates among minorities,[44] whereas others,[45] including this one,  
39  
40 did not. Why minority youth that try smoking have lower smoking intensity than Whites  
41  
42 deserves further research, given that the finding holds across studies;[40, 43] minority  
43  
44 adolescents could be less susceptible to nicotine addiction in its earliest stages.  
45  
46  
47  
48  
49  
50

51  
52  
53 This study was limited in that it relied on cross-sectional data and therefore cannot address  
54  
55 temporality. However, it would be an unusual to see a correlation that is weak in a cross-  
56  
57  
58  
59  
60

1  
2  
3 sectional study to become a key predictor in a longitudinal one. The national scope of the study  
4 could be viewed as a strength, but it precluded us from directly measuring tobacco outlet density.  
5  
6 Instead, we relied on available data, which is subject to higher levels of error than direct  
7  
8 measurement. Although this limitation could have widened confidence intervals due to random  
9  
10 error, we have no reason to believe that the error is larger in some neighborhoods than others,  
11  
12 which would lead to biased estimates. We suggest that, even if the results were statistically  
13  
14 significant, the estimates were still small for tobacco outlet density.  
15  
16  
17  
18  
19  
20  
21

22 We would like to mention a few other limitations. We assessed only a small subset of  
23  
24 community characteristics. This study does not rule out the possibility that other neighborhood  
25  
26 characteristics, such as measures of social capital or neighborhood smoking, may have an  
27  
28 important impact on youth smoking. In fact, one study using the Brofenbrenner model found that  
29  
30 neighborhood rates of youth smoking affected adolescent smoking trajectories, over and above  
31  
32 individual risk factors.[46] Our study did not explicitly measure exposure to tobacco storefront  
33  
34 advertising in the context of community-level influences and therefore cannot address this issue  
35  
36 explicitly. Tobacco outlet density should be a proxy for exposure to storefront advertising but  
37  
38 would not capture individual differences in how adolescents respond to or remember it, which  
39  
40 could explain differences between our findings and those of others who directly measured  
41  
42 recollection of storefront advertising at the individual level.[47] Our study also could not  
43  
44 determine whether some types of team sports confer more protection from established smoking  
45  
46 than others, because it did not elaborate on the nature of the sport played. We did not examine  
47  
48 peer influences, for which many approaches are possible,[48] in detail. Finally, we assessed  
49  
50 tobacco density and proximity at the home, not the school. Future studies should consider the  
51  
52  
53  
54  
55  
56  
57  
58  
59  
60

1  
2  
3 role of school density and proximity to tobacco outlets around schools in context of individual  
4  
5 risk factors.  
6  
7  
8  
9

10 This study adds to the growing body of evidence that public health campaigns to prevent and  
11 reduce youth smoking should emphasize individual risk factors for smoking, including  
12 supporting participation in team sports, minimizing exposure to movie smoking, addressing the  
13 social influence of friend smoking, and addressing experience seeking among high sensation-  
14 seekers. In terms of policy implications, this study supports the need for explicit policies to  
15 minimize youth exposure to movie smoking such as the recommendation to eliminate smoking  
16 from youth-rated movies, and to rate movies R if they contain smoking.[49] Without policies in  
17 place to minimize youth smoking exposure to movie content, parents should be strongly  
18 encouraged to make an effort to minimize their child's exposure to smoking in movies by using  
19 online tools such as [www.common sense media.org](http://www.common sense media.org) which offer information about movie smoking  
20 content in individual movies.  
21  
22  
23  
24  
25  
26  
27  
28  
29  
30  
31  
32  
33  
34  
35  
36  
37  
38

39 **Acknowledgements** None.

40  
41 **Funding** This work was supported by the National Institutes of Health CA77026 and  
42  
43 1K23AG036934.  
44

45  
46 **Competing interests** None.  
47  
48  
49  
50  
51  
52  
53  
54  
55  
56  
57  
58  
59  
60

## REFERENCES

- [1] DiFranza JR, Wellman RJ, Sargent JD, *et al.* Tobacco promotion and the initiation of tobacco use: assessing the evidence for causality. *Pediatrics* 2006;**117**(6):e1237-1248.
- [2] National Cancer Institute. The Role of the Media in Promoting and Reducing Tobacco Use. Tobacco Control Monograph No. 19. Bethesda, MD: U.S. Department of Health and Human Services, National Institutes of Health, National Cancer Institute. NIH Pub. No. 07-6242 2008.
- [3] Sargent JD, Tanski S, Stoolmiller M, *et al.* Using sensation seeking to target adolescents for substance use interventions. *Addiction* 2010;**105**(3):506-514.
- [4] Stephenson MT, Helme DW. Authoritative parenting and sensation seeking as predictors of adolescent cigarette and marijuana use. *J Drug Education* 2006;**36**(3):247-270.
- [5] Adachi-Mejia AM. The influence of early movie smoking exposure and team sports participation on established smoking. *Archives of Pediatrics and Adolescent Medicine* 2009;**163**(7):638-643.
- [6] Perry CL. Results of prevention programs with adolescents. *Drug Alcohol Depend* 1987;**20**(1):13-19.
- [7] Master Settlement Agreement. <http://www.naag.org/issues/tobacco/index.php?sdpid=919>. 1998.
- [8] Feighery EC, Henriksen L, Wang Y, *et al.* An evaluation of four measures of adolescents' exposure to cigarette marketing in stores. *Nicotine Tob Res* 2006;**8**(6):751-759.
- [9] Henriksen L, Feighery EC, Schleicher NC, *et al.* Receptivity to alcohol marketing predicts initiation of alcohol use. *J Adolesc Health* 2008;**42**(1):28-35.
- [10] Novak SP, Reardon SF, Raudenbush SW, *et al.* Retail tobacco outlet density and youth cigarette smoking: a propensity-modeling approach. *Am J Public Health* 2006;**96**(4):670-676.
- [11] Cohen JE, Anglin L. Outlet density: a new frontier for tobacco control. *Addiction* 2009;**104**(1):2-3.
- [12] Henriksen L, Feighery EC, Schleicher NC, *et al.* Is adolescent smoking related to the density and proximity of tobacco outlets and retail cigarette advertising near schools? *Prev Med* 2008;**47**(2):210-214.
- [13] Ogneva-Himmelberger Y, Ross L, Burdick W, *et al.* Using geographic information systems to compare the density of stores selling tobacco and alcohol: youth making an argument for increased regulation of the tobacco permitting process in Worcester, Massachusetts, USA. *Tob Control* 2010;**19**(6):475-480.
- [14] West JH, Blumberg EJ, Kelley NJ, *et al.* Does proximity to retailers influence alcohol and tobacco use among Latino adolescents? *J Immigr Minor Health* 2010;**12**(5):626-633.
- [15] Peterson NA, Lowe JB, Reid RJ. Tobacco outlet density, cigarette smoking prevalence, and demographics at the county level of analysis. *Subst Use Misuse* 2005;**40**(11):1627-1635.
- [16] Schneider JE, Reid RJ, Peterson NA, *et al.* Tobacco outlet density and demographics at the tract level of analysis in Iowa: implications for environmentally based prevention initiatives. *Prev Sci* 2005;**6**(4):319-325.
- [17] Yu D, Peterson NA, Sheffer MA, *et al.* Tobacco outlet density and demographics: analysing the relationships with a spatial regression approach. *Public Health* 2010;**124**(7):412-416.
- [18] Hyland A, Travers MJ, Cummings KM, *et al.* Tobacco outlet density and demographics in Erie County, New York. *Am J Public Health* 2003;**93**(7):1075-1076.
- [19] Paul CL, Mee KJ, Judd TM, *et al.* Anywhere, anytime: retail access to tobacco in New South Wales and its potential impact on consumption and quitting. *Soc Sci Med* 2010;**71**(4):799-806.
- [20] Bronfenbrenner U. Toward an experimental ecology of human development. *American Psychologist* 1977;**32**(7):513-531.



- 1  
2  
3 [21] Bronfenbrenner U. The ecology of developmental processes. In: W. Damon, RM Lerner,  
4 eds. *Handbook of Child Psychology*. New York: John Wiley & Sons, Inc. 1998:993-1028.
- 5 [22] Bronfenbrenner U. Developmental Research, Public Policy, and the Ecology of  
6 Childhood. *Child Dev* 1974;**45**(1):1-5.
- 7 [23] Sargent J, Beach M, Adachi-Mejia A, *et al*. Exposure to movie smoking: Its relation to  
8 smoking initiation among U.S. adolescents. *Pediatrics* 2005;**116**(5):1183-1191.
- 9 [24] Sargent JD, Worth KA, Beach M, *et al*. Population-Based Assessment of Exposure to  
10 Risk Behaviors in Motion Pictures. *Commun Methods Meas* 2008;**2**(1-2):134-151.
- 11 [25] Carlos HA, Shi X, Sargent J, *et al*. Density estimation and adaptive bandwidths: a primer  
12 for public health practitioners. *Int J Health Geogr* 2010;**9**:39.
- 13 [26] Shi X. Selection of bandwidth type and adjustment side in kernel density estimation over  
14 inhomogenous backgrounds. *International Journal of Geographic Information Science*  
15 2010;**24**(5):643-660.
- 16 [27] Oak Ridge National Laboratory. LandScan Global Population Database. Oak Ridge, TN.
- 17 [28] Esri. Esri StreetMap Premium - Advanced Geocoding, Routing, and Cartography.  
18 Redlands, CA.
- 19 [29] Sargent JD, Gibson J, Heatherton TF. Comparing the effects of entertainment media  
20 and tobacco marketing on youth smoking. *Tob Control* 2009;**18**(1):47-53.
- 21 [30] Sargent JD, Hanewinkel R. Comparing the effects of entertainment media and tobacco  
22 marketing on youth smoking in Germany. *Addiction* 2009;**104**:815-823.
- 23 [31] DiFranza JR, Rigotti NA, McNeill AD, *et al*. Initial symptoms of nicotine dependence in  
24 adolescents. *Tob Control* 2000;**9**(3):313-319.
- 25 [32] DiFranza JR, Savageau JA, Fletcher K, *et al*. Measuring the loss of autonomy over  
26 nicotine use in adolescents: the DANDY (Development and Assessment of Nicotine  
27 Dependence in Youths) study. *Arch Pediatr Adolesc Med* 2002;**156**(4):397-403.
- 28 [33] Skara S, Sussman S, Dent CW. Predicting regular cigarette use among continuation  
29 high school students. *Am J Health Behav* 2001;**25**(2):147-156.
- 30 [34] Zuckerman M. Behavioral expressions and biosocial bases of sensation seeking. New  
31 York: Cambridge University Press 1994.
- 32 [35] Newcomb MD, McGee L. Influence of sensation seeking on general deviance and  
33 specific problem behaviors from adolescence to young adulthood. *J Pers Soc Psychol*  
34 1991;**61**(4):614-628.
- 35 [36] Perkins KA, Gerlach D, Broge M, *et al*. Greater sensitivity to subjective effects of nicotine  
36 in nonsmokers high in sensation seeking. *Exp Clin Psychopharmacol* 2000;**8**(4):462-471.
- 37 [37] Conrod PJ, Castellanos N, Mackie C. Personality-targeted interventions delay the  
38 growth of adolescent drinking and binge drinking. *J Child Psychol Psychiatry* 2008;**49**(2):181-  
39 190.
- 40 [38] Stoolmiller M, Gerrard M, Sargent JD, *et al*. R-rated movie viewing, growth in sensation  
41 seeking and alcohol initiation: reciprocal and moderation effects. *Prev Sci* 2010;**11**(1):1-13.
- 42 [39] Robinson LA, Murray DM, Alfano CM, *et al*. Ethnic differences in predictors of  
43 adolescent smoking onset and escalation: A longitudinal study from 7th to 12th grade. *Nicotine  
44 & Tobacco Research* 2006;**8**(2):297-307.
- 45 [40] Bachman JG, Wallace JM, Jr., O'Malley PM, *et al*. Racial/Ethnic differences in smoking,  
46 drinking, and illicit drug use among American high school seniors, 1976-89. *Am J Public Health*  
47 1991;**81**(3):372-377.
- 48 [41] Lewis PC, Harrell JS, Bradley C, *et al*. Cigarette use in adolescents: the Cardiovascular  
49 Health in Children and Youth Study. *ResNursHealth* 2001;**24**(1):27-37.
- 50 [42] Nelson MC, Gordon-Larsen P. Physical activity and sedentary behavior patterns are  
51 associated with selected adolescent health risk behaviors. *Pediatrics* 2006;**117**(4):1281-1290.
- 52 [43] Flint AJ, Yamada EG, Novotny TE. Black-white differences in cigarette smoking uptake:  
53 progression from adolescent experimentation to regular use. *Prev Med* 1998;**27**(3):358-364.
- 54  
55  
56  
57  
58  
59  
60

- 1  
2  
3 [44] Headen SW, Bauman KE, Deane GD, *et al*. Are the correlates of cigarette smoking  
4 initiation different for black and white adolescents? *Am J Public Health* 1991;**81**(7):854-858.  
5 [45] Jackson C, Brown JD, L'Engle KL. R-rated movies, bedroom televisions, and initiation of  
6 smoking by white and black adolescents. *Arch Pediatr Adolesc Med* 2007;**161**(3):260-268.  
7 [46] Ennett ST, Foshee VA, Bauman KE, *et al*. A social contextual analysis of youth cigarette  
8 smoking development. *Nicotine Tob Res* 2010;**12**(9):950-962.  
9 [47] Henriksen L, Feighery EC, Wang Y, *et al*. Association of retail tobacco marketing with  
10 adolescent smoking. *Am J Public Health* 2004;**94**(12):2081-2083.  
11 [48] Kobus K. Peers and adolescent smoking. *Addiction* 2003;**98 Suppl 1**:37-55.  
12 [49] Smoke Free Movies. <http://smokefreemovies.ucsf.edu/index.html>.  
13  
14  
15  
16  
17  
18  
19  
20  
21  
22  
23  
24  
25  
26  
27  
28  
29  
30  
31  
32  
33  
34  
35  
36  
37  
38  
39  
40  
41  
42  
43  
44  
45  
46  
47  
48  
49  
50  
51  
52  
53  
54  
55  
56  
57  
58  
59  
60

## STROBE Statement—checklist of items that should be included in reports of observational studies

|                              | Item No | Recommendation                                                                                                                                                                                                                                                                                                                                                                                                                                                                                                                                                                                                                                                                                   |
|------------------------------|---------|--------------------------------------------------------------------------------------------------------------------------------------------------------------------------------------------------------------------------------------------------------------------------------------------------------------------------------------------------------------------------------------------------------------------------------------------------------------------------------------------------------------------------------------------------------------------------------------------------------------------------------------------------------------------------------------------------|
| <b>Title and abstract</b>    | 1       | (a) Indicate the study's design with a commonly used term in the title or the abstract<br>(b) Provide in the abstract an informative and balanced summary of what was done and what was found                                                                                                                                                                                                                                                                                                                                                                                                                                                                                                    |
| <b>Introduction</b>          |         |                                                                                                                                                                                                                                                                                                                                                                                                                                                                                                                                                                                                                                                                                                  |
| Background/rationale         | 2       | Explain the scientific background and rationale for the investigation being reported                                                                                                                                                                                                                                                                                                                                                                                                                                                                                                                                                                                                             |
| Objectives                   | 3       | State specific objectives, including any prespecified hypotheses                                                                                                                                                                                                                                                                                                                                                                                                                                                                                                                                                                                                                                 |
| <b>Methods</b>               |         |                                                                                                                                                                                                                                                                                                                                                                                                                                                                                                                                                                                                                                                                                                  |
| Study design                 | 4       | Present key elements of study design early in the paper                                                                                                                                                                                                                                                                                                                                                                                                                                                                                                                                                                                                                                          |
| Setting                      | 5       | Describe the setting, locations, and relevant dates, including periods of recruitment, exposure, follow-up, and data collection                                                                                                                                                                                                                                                                                                                                                                                                                                                                                                                                                                  |
| Participants                 | 6       | (a) <i>Cohort study</i> —Give the eligibility criteria, and the sources and methods of selection of participants. Describe methods of follow-up<br><i>Case-control study</i> —Give the eligibility criteria, and the sources and methods of case ascertainment and control selection. Give the rationale for the choice of cases and controls<br><i>Cross-sectional study</i> —Give the eligibility criteria, and the sources and methods of selection of participants<br>(b) <i>Cohort study</i> —For matched studies, give matching criteria and number of exposed and unexposed<br><i>Case-control study</i> —For matched studies, give matching criteria and the number of controls per case |
| Variables                    | 7       | Clearly define all outcomes, exposures, predictors, potential confounders, and effect modifiers. Give diagnostic criteria, if applicable                                                                                                                                                                                                                                                                                                                                                                                                                                                                                                                                                         |
| Data sources/<br>measurement | 8*      | For each variable of interest, give sources of data and details of methods of assessment (measurement). Describe comparability of assessment methods if there is more than one group                                                                                                                                                                                                                                                                                                                                                                                                                                                                                                             |
| Bias                         | 9       | Describe any efforts to address potential sources of bias                                                                                                                                                                                                                                                                                                                                                                                                                                                                                                                                                                                                                                        |
| Study size                   | 10      | Explain how the study size was arrived at                                                                                                                                                                                                                                                                                                                                                                                                                                                                                                                                                                                                                                                        |
| Quantitative variables       | 11      | Explain how quantitative variables were handled in the analyses. If applicable, describe which groupings were chosen and why                                                                                                                                                                                                                                                                                                                                                                                                                                                                                                                                                                     |
| Statistical methods          | 12      | (a) Describe all statistical methods, including those used to control for confounding<br>(b) Describe any methods used to examine subgroups and interactions<br>(c) Explain how missing data were addressed<br>(d) <i>Cohort study</i> —If applicable, explain how loss to follow-up was addressed<br><i>Case-control study</i> —If applicable, explain how matching of cases and controls was addressed<br><i>Cross-sectional study</i> —If applicable, describe analytical methods taking account of sampling strategy<br>(e) Describe any sensitivity analyses                                                                                                                                |

Continued on next page

1  
2  
3  
4  
5  
6  
7  
8  
9  
10  
11  
12  
13  
14  
15  
16  
17  
18  
19  
20  
21  
22  
23  
24  
25  
26  
27  
28  
29  
30  
31  
32  
33  
34  
35  
36  
37  
38  
39  
40  
41  
42  
43  
44  
45  
46  
47  
48  
49  
50  
51  
52  
53  
54  
55  
56  
57  
58  
59  
60**Results**

|                  |     |                                                                                                                                                                                                                                                                                                                                                                                                               |
|------------------|-----|---------------------------------------------------------------------------------------------------------------------------------------------------------------------------------------------------------------------------------------------------------------------------------------------------------------------------------------------------------------------------------------------------------------|
| Participants     | 13* | (a) Report numbers of individuals at each stage of study—eg numbers potentially eligible, examined for eligibility, confirmed eligible, included in the study, completing follow-up, and analysed<br>(b) Give reasons for non-participation at each stage<br>(c) Consider use of a flow diagram                                                                                                               |
| Descriptive data | 14* | (a) Give characteristics of study participants (eg demographic, clinical, social) and information on exposures and potential confounders<br>(b) Indicate number of participants with missing data for each variable of interest<br>(c) <i>Cohort study</i> —Summarise follow-up time (eg, average and total amount)                                                                                           |
| Outcome data     | 15* | <i>Cohort study</i> —Report numbers of outcome events or summary measures over time<br><i>Case-control study</i> —Report numbers in each exposure category, or summary measures of exposure<br><i>Cross-sectional study</i> —Report numbers of outcome events or summary measures                                                                                                                             |
| Main results     | 16  | (a) Give unadjusted estimates and, if applicable, confounder-adjusted estimates and their precision (eg, 95% confidence interval). Make clear which confounders were adjusted for and why they were included<br>(b) Report category boundaries when continuous variables were categorized<br>(c) If relevant, consider translating estimates of relative risk into absolute risk for a meaningful time period |
| Other analyses   | 17  | Report other analyses done—eg analyses of subgroups and interactions, and sensitivity analyses                                                                                                                                                                                                                                                                                                                |

**Discussion**

|                  |    |                                                                                                                                                                            |
|------------------|----|----------------------------------------------------------------------------------------------------------------------------------------------------------------------------|
| Key results      | 18 | Summarise key results with reference to study objectives                                                                                                                   |
| Limitations      | 19 | Discuss limitations of the study, taking into account sources of potential bias or imprecision. Discuss both direction and magnitude of any potential bias                 |
| Interpretation   | 20 | Give a cautious overall interpretation of results considering objectives, limitations, multiplicity of analyses, results from similar studies, and other relevant evidence |
| Generalisability | 21 | Discuss the generalisability (external validity) of the study results                                                                                                      |

**Other information**

|         |    |                                                                                                                                                               |
|---------|----|---------------------------------------------------------------------------------------------------------------------------------------------------------------|
| Funding | 22 | Give the source of funding and the role of the funders for the present study and, if applicable, for the original study on which the present article is based |
|---------|----|---------------------------------------------------------------------------------------------------------------------------------------------------------------|

\*Give information separately for cases and controls in case-control studies and, if applicable, for exposed and unexposed groups in cohort and cross-sectional studies.

**Note:** An Explanation and Elaboration article discusses each checklist item and gives methodological background and published examples of transparent reporting. The STROBE checklist is best used in conjunction with this article (freely available on the Web sites of PLoS Medicine at <http://www.plosmedicine.org/>, Annals of Internal Medicine at <http://www.annals.org/>, and Epidemiology at <http://www.epidem.com/>). Information on the STROBE Initiative is available at [www.strobe-statement.org](http://www.strobe-statement.org).



**A comparison of individual versus community influences on youth smoking behaviors: A cross-sectional observational study**

|                                 |                                                                                                                                                                                                                                                                                                                                                                                                                                                                                                                                                                                                                                             |
|---------------------------------|---------------------------------------------------------------------------------------------------------------------------------------------------------------------------------------------------------------------------------------------------------------------------------------------------------------------------------------------------------------------------------------------------------------------------------------------------------------------------------------------------------------------------------------------------------------------------------------------------------------------------------------------|
| Journal:                        | <i>BMJ Open</i>                                                                                                                                                                                                                                                                                                                                                                                                                                                                                                                                                                                                                             |
| Manuscript ID:                  | bmjopen-2011-000767.R1                                                                                                                                                                                                                                                                                                                                                                                                                                                                                                                                                                                                                      |
| Article Type:                   | Research                                                                                                                                                                                                                                                                                                                                                                                                                                                                                                                                                                                                                                    |
| Date Submitted by the Author:   | 07-Jul-2012                                                                                                                                                                                                                                                                                                                                                                                                                                                                                                                                                                                                                                 |
| Complete List of Authors:       | Adachi-Mejia, Anna; The Geisel School of Medicine at Dartmouth, Pediatrics; Norris Cotton Cancer Center, Cancer Control Research Program<br>Carlos, Heather; Dartmouth-Hitchcock Norris Cotton Cancer Center, Berke, Ethan; The Dartmouth Institute of Health Policy and Clinical Practice, ; Norris Cotton Cancer Center, Cancer Control Research Program<br>Tanski, Susanne; The Geisel School of Medicine at Dartmouth, Pediatrics; Norris Cotton Cancer Center, Cancer Control Research Program<br>Sargent, James; The Geisel School of Medicine at Dartmouth, Pediatrics; Norris Cotton Cancer Center, Cancer Control Research Program |
| <b>Primary Subject Heading</b>: | Public health                                                                                                                                                                                                                                                                                                                                                                                                                                                                                                                                                                                                                               |
| Secondary Subject Heading:      | Smoking and tobacco, Health policy, Public health, Paediatrics, Addiction                                                                                                                                                                                                                                                                                                                                                                                                                                                                                                                                                                   |
| Keywords:                       | PREVENTIVE MEDICINE, Community child health < PAEDIATRICS, PUBLIC HEALTH                                                                                                                                                                                                                                                                                                                                                                                                                                                                                                                                                                    |
|                                 |                                                                                                                                                                                                                                                                                                                                                                                                                                                                                                                                                                                                                                             |

SCHOLARONE™  
Manuscripts

only

## STROBE Statement—checklist of items that should be included in reports of observational studies

|                              | Item No | Recommendation                                                                                                                                                                                                                                                                                                                                                                                                                                                                                                                                                                                                                                                                                   |
|------------------------------|---------|--------------------------------------------------------------------------------------------------------------------------------------------------------------------------------------------------------------------------------------------------------------------------------------------------------------------------------------------------------------------------------------------------------------------------------------------------------------------------------------------------------------------------------------------------------------------------------------------------------------------------------------------------------------------------------------------------|
| <b>Title and abstract</b>    | 1       | (a) Indicate the study's design with a commonly used term in the title or the abstract<br>(b) Provide in the abstract an informative and balanced summary of what was done and what was found                                                                                                                                                                                                                                                                                                                                                                                                                                                                                                    |
| <b>Introduction</b>          |         |                                                                                                                                                                                                                                                                                                                                                                                                                                                                                                                                                                                                                                                                                                  |
| Background/rationale         | 2       | Explain the scientific background and rationale for the investigation being reported                                                                                                                                                                                                                                                                                                                                                                                                                                                                                                                                                                                                             |
| Objectives                   | 3       | State specific objectives, including any prespecified hypotheses                                                                                                                                                                                                                                                                                                                                                                                                                                                                                                                                                                                                                                 |
| <b>Methods</b>               |         |                                                                                                                                                                                                                                                                                                                                                                                                                                                                                                                                                                                                                                                                                                  |
| Study design                 | 4       | Present key elements of study design early in the paper                                                                                                                                                                                                                                                                                                                                                                                                                                                                                                                                                                                                                                          |
| Setting                      | 5       | Describe the setting, locations, and relevant dates, including periods of recruitment, exposure, follow-up, and data collection                                                                                                                                                                                                                                                                                                                                                                                                                                                                                                                                                                  |
| Participants                 | 6       | (a) <i>Cohort study</i> —Give the eligibility criteria, and the sources and methods of selection of participants. Describe methods of follow-up<br><i>Case-control study</i> —Give the eligibility criteria, and the sources and methods of case ascertainment and control selection. Give the rationale for the choice of cases and controls<br><i>Cross-sectional study</i> —Give the eligibility criteria, and the sources and methods of selection of participants<br>(b) <i>Cohort study</i> —For matched studies, give matching criteria and number of exposed and unexposed<br><i>Case-control study</i> —For matched studies, give matching criteria and the number of controls per case |
| Variables                    | 7       | Clearly define all outcomes, exposures, predictors, potential confounders, and effect modifiers. Give diagnostic criteria, if applicable                                                                                                                                                                                                                                                                                                                                                                                                                                                                                                                                                         |
| Data sources/<br>measurement | 8*      | For each variable of interest, give sources of data and details of methods of assessment (measurement). Describe comparability of assessment methods if there is more than one group                                                                                                                                                                                                                                                                                                                                                                                                                                                                                                             |
| Bias                         | 9       | Describe any efforts to address potential sources of bias                                                                                                                                                                                                                                                                                                                                                                                                                                                                                                                                                                                                                                        |
| Study size                   | 10      | Explain how the study size was arrived at                                                                                                                                                                                                                                                                                                                                                                                                                                                                                                                                                                                                                                                        |
| Quantitative variables       | 11      | Explain how quantitative variables were handled in the analyses. If applicable, describe which groupings were chosen and why                                                                                                                                                                                                                                                                                                                                                                                                                                                                                                                                                                     |
| Statistical methods          | 12      | (a) Describe all statistical methods, including those used to control for confounding<br>(b) Describe any methods used to examine subgroups and interactions<br>(c) Explain how missing data were addressed<br>(d) <i>Cohort study</i> —If applicable, explain how loss to follow-up was addressed<br><i>Case-control study</i> —If applicable, explain how matching of cases and controls was addressed<br><i>Cross-sectional study</i> —If applicable, describe analytical methods taking account of sampling strategy<br>(e) Describe any sensitivity analyses                                                                                                                                |

Continued on next page

1  
2  
3  
4  
5  
6  
7  
8  
9  
10  
11  
12  
13  
14  
15  
16  
17  
18  
19  
20  
21  
22  
23  
24  
25  
26  
27  
28  
29  
30  
31  
32  
33  
34  
35  
36  
37  
38  
39  
40  
41  
42  
43  
44  
45  
46  
47  
48  
49  
50  
51  
52  
53  
54  
55  
56  
57  
58  
59  
60

## Results

|                  |     |                                                                                                                                                                                                                                                                                                                                                                                                               |
|------------------|-----|---------------------------------------------------------------------------------------------------------------------------------------------------------------------------------------------------------------------------------------------------------------------------------------------------------------------------------------------------------------------------------------------------------------|
| Participants     | 13* | (a) Report numbers of individuals at each stage of study—eg numbers potentially eligible, examined for eligibility, confirmed eligible, included in the study, completing follow-up, and analysed<br>(b) Give reasons for non-participation at each stage<br>(c) Consider use of a flow diagram                                                                                                               |
| Descriptive data | 14* | (a) Give characteristics of study participants (eg demographic, clinical, social) and information on exposures and potential confounders<br>(b) Indicate number of participants with missing data for each variable of interest<br>(c) <i>Cohort study</i> —Summarise follow-up time (eg, average and total amount)                                                                                           |
| Outcome data     | 15* | <i>Cohort study</i> —Report numbers of outcome events or summary measures over time<br><i>Case-control study</i> —Report numbers in each exposure category, or summary measures of exposure<br><i>Cross-sectional study</i> —Report numbers of outcome events or summary measures                                                                                                                             |
| Main results     | 16  | (a) Give unadjusted estimates and, if applicable, confounder-adjusted estimates and their precision (eg, 95% confidence interval). Make clear which confounders were adjusted for and why they were included<br>(b) Report category boundaries when continuous variables were categorized<br>(c) If relevant, consider translating estimates of relative risk into absolute risk for a meaningful time period |
| Other analyses   | 17  | Report other analyses done—eg analyses of subgroups and interactions, and sensitivity analyses                                                                                                                                                                                                                                                                                                                |

## Discussion

|                  |    |                                                                                                                                                                            |
|------------------|----|----------------------------------------------------------------------------------------------------------------------------------------------------------------------------|
| Key results      | 18 | Summarise key results with reference to study objectives                                                                                                                   |
| Limitations      | 19 | Discuss limitations of the study, taking into account sources of potential bias or imprecision. Discuss both direction and magnitude of any potential bias                 |
| Interpretation   | 20 | Give a cautious overall interpretation of results considering objectives, limitations, multiplicity of analyses, results from similar studies, and other relevant evidence |
| Generalisability | 21 | Discuss the generalisability (external validity) of the study results                                                                                                      |

## Other information

|         |    |                                                                                                                                                               |
|---------|----|---------------------------------------------------------------------------------------------------------------------------------------------------------------|
| Funding | 22 | Give the source of funding and the role of the funders for the present study and, if applicable, for the original study on which the present article is based |
|---------|----|---------------------------------------------------------------------------------------------------------------------------------------------------------------|

\*Give information separately for cases and controls in case-control studies and, if applicable, for exposed and unexposed groups in cohort and cross-sectional studies.

**Note:** An Explanation and Elaboration article discusses each checklist item and gives methodological background and published examples of transparent reporting. The STROBE checklist is best used in conjunction with this article (freely available on the Web sites of PLoS Medicine at <http://www.plosmedicine.org/>, Annals of Internal Medicine at <http://www.annals.org/>, and Epidemiology at <http://www.epidem.com/>). Information on the STROBE Initiative is available at [www.strobe-statement.org](http://www.strobe-statement.org).



1  
2  
3 **A comparison of individual versus community influences on youth smoking behaviors: A**  
4 **cross-sectional **observational** study**  
5  
6

7 Anna M. Adachi-Mejia, Ph.D.<sup>a,b,c,d</sup>  
8 Heather A. Carlos<sup>b</sup>  
9 Ethan M. Berke, M.D., M.P.H.<sup>c,d,e</sup>  
10 Susanne E. Tanski, M.D.<sup>a,b,c</sup>  
11 James D. Sargent, M.D.<sup>a,b,c</sup>  
12  
13  
14  
15

16 <sup>a</sup>Pediatrics, Dartmouth Medical School, Lebanon, NH, USA

17 <sup>b</sup>Dartmouth-Hitchcock Norris Cotton Cancer Center, Lebanon, NH, USA

18 <sup>c</sup>Cancer Control Research Program, Norris Cotton Cancer Center, Lebanon, NH, USA

19 <sup>d</sup>The Dartmouth Institute of Health Policy and Clinical Practice, Lebanon, NH, USA

20 <sup>e</sup>Community & Family Medicine, Dartmouth Medical School, Hanover, NH, USA  
21  
22

23  
24 Correspondence concerning this article should be addressed to: Anna M. Adachi-Mejia, Ph.D.,  
25 HB 7925, Cancer Control Research Program, Dartmouth-Hitchcock Norris Cotton Cancer  
26 Center, Lebanon, NH 03756, USA; Tel (603) 653-6124, Fax (603) 653-9090, E-mail:  
27 [anna.adachi-mejia@dartmouth.edu](mailto:anna.adachi-mejia@dartmouth.edu)  
28

29 Contributorship statement: All authors 1) made substantial contributions to conception and  
30 design, acquisition of data, or analysis and interpretation of data; 2) drafted the article or revised  
31 it critically for important intellectual content; 3) approved of the final version to be published.  
32  
33

34 Words: 3964

35 Tables: 4

36 Figures: 0  
37  
38

39 Key words: Smoking, youth, tobacco outlet density, policy, GIS  
40  
41  
42  
43  
44  
45  
46  
47  
48  
49  
50  
51  
52  
53  
54  
55  
56  
57  
58  
59  
60



## ABSTRACT

**Objectives** To compare individual with community risk factors for adolescent smoking.

**Design** A cross-sectional observational study with multivariate analysis.

**Setting** National telephone survey.

**Participants** 3646 US adolescents aged 13-18 years in 2007 recruited through a random digital survey.

**Outcome measures** Ever tried smoking and, among experimental smokers, smoking intensity (based on smoking in past 30 days).

**Results** One-third of participants (35.6%, N=1297) had tried smoking. After controlling for individual risk factors, neither tobacco outlet density nor proximity were associated with tried smoking or smoking intensity. Associations with trying smoking included age (Adjusted Odds Ratio [AOR] = 1.23, 95% CI 1.16, 1.31), lower socioeconomic status (AOR = 0.82, 95% CI 0.74, 0.91), sibling smoking (AOR=2.13, 95% CI 1.75, 2.59), friend smoking (AOR = 2.60, 95% CI 2.19, 3.10 for some and AOR = 7.01, 95% CI 5.05,9.74 for most), movie smoking exposure (AOR = 2.66, 95% CI 1.95, 3.63), team sports participation (AOR = 0.69, 95% CI 0.54, 0.89) and sensation seeking (AOR = 7.72, 95% CI 5.26, 11.34). Among experimental smokers, age (AOR = 1.33, 95% CI 1.20, 1.48), minority status (AOR = 0.42, 95% CI 0.22, 0.81 for Black; AOR = 0.50, 95% CI 0.30, 0.83 for Hispanic), friend smoking (AOR = 6.38, 95% CI 3.29,12.39 for some; AOR = 32.98, 95% CI 16.43,66.19 for most), team sports participation (AOR = 0.46, 95% CI 0.30, 0.72), and sensation seeking (AOR = 6.89, 95% CI 3.42, 13.88) were associated with smoking intensity.

**Conclusions** The study suggests that interventions and policies to prevent and reduce youth smoking should focus on individual risk factors for smoking, including supporting participation

1  
2  
3  
4  
5  
6  
7  
8  
9  
10  
11  
12  
13  
14  
15  
16  
17  
18  
19  
20  
21  
22  
23  
24  
25  
26  
27  
28  
29  
30  
31  
32  
33  
34  
35  
36  
37  
38  
39  
40  
41  
42  
43  
44  
45  
46  
47  
48  
49  
50  
51  
52  
53  
54  
55  
56  
57  
58  
59  
60

in team sports, minimizing exposure to movie smoking, addressing the social influence of friend smoking, and addressing experience seeking among high sensation-seekers.

For peer review only

## INTRODUCTION

Preventing adolescent smoking is a key public health imperative. Individual risk factors for youth smoking have been studied for decades. They include personality factors such as sensation seeking,(1, 2) and other social influences like parent(3-6) and friend(7, 8) smoking. They also include exposure to tobacco marketing(9) and smoking in entertainment media(10), which were both considered causal risk factors in a recent (2012) Surgeon General's report on smoking in adolescents and young adults.(11) Research has shown that extracurricular activities, such as team sports participation, are associated with preventing youth smoking.(12-16) Knowledge about these risk factors has informed interventions aiming to minimize adolescents' responsiveness to social risk factors(17) and policies to minimize adolescent's exposure to tobacco marketing and movies.(18)

In addition to individual risk factors, community influences such as frequent exposure to tobacco outlets(19) and tobacco outlet density,(20, 21) have been associated with youth smoking.

Compared to the compelling research on individual risk factors, evidence for community influence is mixed. Studies to date have been regional, have not extensively controlled for individual characteristics, and have applied varying approaches to density measurement.(21-24)

To our knowledge, studies have not yet tested whether the association between tobacco outlet density and proximity is confounded by race or social influences like sibling and friend smoking.

One study that controlled for individual sociodemographics failed to find an association between tobacco outlet density and youth smoking.(25)

1  
2  
3 Another area to consider in the context of tobacco outlet density and proximity is their  
4  
5 association with neighborhood characteristics, such as poverty, that may also pose a community  
6  
7 risk factor for smoking. Many studies show an association between tobacco outlet density and  
8  
9 neighborhoods characterized by high percentages of minorities(21, 23, 26-29) and low  
10  
11 income,(21, 23, 27-29) although this finding has not been consistent across regions.(26) Thus,  
12  
13 the finding that tobacco outlet density is related to youth smoking could also be confounded by  
14  
15 community factors. Nevertheless, the literature was robust enough for Cohen et al. to propose  
16  
17 policies to limit tobacco outlet density to reduce youth smoking,(30) raising the question of  
18  
19 whether individual or community-level factors have greater potential to prevent youth smoking.  
20  
21  
22  
23  
24  
25  
26

27 This study examines the role of access to tobacco outlets on youth smoking in a national sample  
28  
29 of U.S. adolescents. By access, we mean approaching, entering, exiting, and having exposure to  
30  
31 information imparted to potential customers about tobacco products, including visibility of in-  
32  
33 store and storefront advertising. Our focus is twofold—to assess the multivariate association with  
34  
35 youth smoking after controlling for other individual and community risk factors, and to compare  
36  
37 the sizes of these associations. It is the first to consider the role of community-level factors on  
38  
39 adolescent smoking in the U.S. nationwide, and the first to jointly examine individual social and  
40  
41 media influence risk factors with community-level factors. The intent of this work is to inform  
42  
43 interventional research and policies related to tobacco control efforts directed at youth.  
44  
45  
46  
47  
48  
49

## 50 METHODS

### 51 Theoretical Framework

52  
53  
54  
55  
56  
57  
58  
59  
60

1  
2  
3 This study is guided by Bronfenbrenner's Ecological Systems Theory,(31-33) which posits that  
4 development, health and well-being are situated within and shaped by the interactions that occur  
5  
6 between the individual and the four systems: microsystem (immediate environment),  
7  
8 mesosystem (connections between immediate environments, e.g., tobacco outlet density and  
9  
10 proximity), exosystem (indirect external environmental settings), and macrosystem (larger  
11  
12 cultural context).(31-33) For this study, we include individual-level variables that are well-  
13  
14 established risk factors for smoking: gender, race/ethnicity, socioeconomic status, and the  
15  
16 personality characteristic of sensation seeking. We also include the microsystem variables of  
17  
18 friend smoking, sibling smoking, exposure to smoking in movies, and team sports participation.  
19  
20 Our mesosystem variables include tobacco outlet density and distance to closest tobacco outlet.  
21  
22 Our exosystem variables include proportion population Black, proportion population Hispanic,  
23  
24 and proportion of families with income below the poverty level.  
25  
26  
27  
28  
29  
30  
31  
32  
33

### 34 **Sample Recruitment**

35  
36 A detailed description of the recruitment methods for study participants has been published  
37  
38 previously.(34) Briefly, between June and October 2003, 6522 U.S. adolescents aged 10-14  
39  
40 years were recruited through a random digit-dial telephone survey, which captured a  
41  
42 representative sample of U.S. adolescents. Five follow-up surveys were conducted at 8-month  
43  
44 intervals. This study involves the fifth follow-up survey conducted in the fall of 2007.  
45  
46 Interviewers successfully contacted 3055 (47%) of the original 6522 adolescents for this round.  
47  
48 Loss to follow up was higher among Blacks, older adolescents, those of lower socioeconomic  
49  
50 status, baseline smokers and higher sensation seekers. To address the minority attrition, a sample  
51  
52 of 598 Black adolescents (in the same age range) were recruited through lists of residential  
53  
54  
55  
56  
57  
58  
59  
60

1  
2  
3 numbers for U.S. census tracts for which African-Americans represented 20% or more of the  
4 population, resulting in available sample of 3653 for this study. Parental consent and adolescent  
5 assent were required for participation. The study was approved by the Committee for the  
6 Protection of Human Subjects at Dartmouth Medical School. The 3653 subjects lived in 3456  
7 unique census tracts, of which the majority (95.5%) contained only 1 subject; 144 tracts (4.2%)  
8 contained two subjects, and 11 tracts (0.3%) contained three subjects. Most adolescent  
9 residential locations were geocoded to their home street address (N=3167). When home street  
10 address was not available, they were geocoded to their ZIP code centroid (N=479), resulting in a  
11 final sample size of N=3646 for this study. We used a complete case analysis approach because  
12 only 110 subjects (3%) were missing data from one or more variables. The dependent and  
13 independent variables include dichotomous, polychotomous and continuous variables. Three  
14 variables (smoking intensity, socioeconomic status, and sensation seeking) are scales derived  
15 from two or more items, constructed using the “alpha, gen(varlist)” command in Stata 12. The  
16 sections below describe how we ascertained the information, constructed the variables, handled  
17 outliers, and rescaled the variables in order to compare the associations in our analytical models.

## 40 Outcome Variables

41  
42  
43 *Ever tried smoking:* Respondents were asked, “How many cigarettes have you smoked in your  
44 life” and those who responded “none” were categorized as ever smokers. Those who responded  
45 in a category that indicated lifetime smoking were then asked about past 30 day smoking  
46 intensity.  
47  
48  
49  
50  
51  
52  
53  
54  
55  
56  
57  
58  
59  
60

1  
2  
3 *Smoking intensity:* **Smoking** intensity was based on a composite measure using three items  
4  
5 (alpha = 0.87): “During the past 30 days, on how many days did you smoke cigarettes?” (none,  
6  
7 1-10 days, 11-29 days, or every day); “During the past 30 days, on the weekdays that you  
8  
9 smoked, how many cigarettes did you usually smoke per day?” (1 to 5, 6 to 10, 11 to 20, more  
10  
11 than 20); “During the past 30 days, on the weekends that you smoked, how many cigarettes did  
12  
13 you usually smoke per day?” (1 to 5, 6 to 10, 11 to 20, more than 20).  
14  
15  
16  
17  
18  
19

### 20 **Individual risk factors**

21  
22  
23  
24 *Sociodemographics:* Individual measures of age, race and ethnicity were included.  
25

26  
27 Socioeconomic status (**SES**) was assessed using a standardized composite measure based on  
28  
29 parent reports of their own education and household income (alpha = 0.69). **The variable was**  
30  
31 **centered around zero and a 1-point increase corresponded to a 1 standard deviation increase in**  
32  
33 **SES.**  
34  
35  
36  
37  
38

39  
40 *Sibling smoking:* Sibling smoking was assessed with the question, “Do any of your older  
41  
42 brothers or sisters smoke cigarettes? (**Yes, No**)”  
43  
44  
45

46  
47 *Friend smoking:* Friend smoking was assessed with the question, “How many of your friends  
48  
49 smoke cigarettes? Your choices are none, some, or most.”  
50  
51  
52

53  
54 *Exposure to movie smoking:* Adolescents’ exposure to movie smoking was estimated using the  
55  
56 Beach method(35) for top U.S. box-office hits from 2000-2006 (n = 384). Movies were content-  
57  
58  
59  
60

1  
2  
3 coded for smoking using previously validated methods.(35) Each adolescent survey was  
4  
5 programmed to randomly select 50 movie titles from the larger pool of 384 movies; respondents  
6  
7 were asked whether they had ever seen each movie title. To create a measure of exposure to  
8  
9 movie smoking, the number of smoking occurrences in films each adolescent had seen from  
10  
11 his/her unique list of 50 movies were summed. A proportion was generated by dividing this  
12  
13 number by the number of smoking occurrences that the adolescent would have seen had all 50  
14  
15 movies in the unique list been viewed and this proportion was multiplied by the number of  
16  
17 smoking occurrences in the entire parent sample of 384 movies.  
18  
19  
20  
21  
22  
23

24  
25 *Team sports participation:* Team sports participation was assessed with a single item, “Now I’d  
26  
27 like you to think about all the sports teams you played on during the past 12 months, including  
28  
29 all school, community or recreational teams. How many sports teams did you play on in the past  
30  
31 12 months?” Team sports participation was skewed right, with responses ranging up to 12, with  
32  
33 4 at the 95<sup>th</sup> percentile.  
34  
35  
36  
37  
38

39  
40 *Sensation seeking:* Sensation seeking propensity was assessed using a short 5-item measure: “I  
41  
42 would like to explore strange places,” “I like to do frightening things,” “I like new and exciting  
43  
44 experiences, even if I have to break the rules,” “I like to listen to loud music,” “I like to do  
45  
46 dangerous things.” Each of these items had the following response categories for each statement:  
47  
48 Strongly Agree, Disagree, Agree, Strongly Agree. These items had a Cronbach's alpha ( $\alpha$ ) of  
49  
50 0.70. The sensation seeking scale ranged from 0 to 15 with 12 at the 95<sup>th</sup> percentile.  
51  
52  
53  
54

## 55 **Community influences**

56  
57  
58  
59  
60



1  
2  
3  
4  
5  
6 *Tobacco outlets:* To obtain a national dataset for tobacco outlets, we reviewed North American  
7  
8 Industry Classification System (NAICS) codes and selected establishments that were likely to  
9  
10 sell tobacco products. The Office of Management and Budget (OMB) developed NAICS for use  
11  
12 by Federal statistical agencies in classifying all business establishments based on their primary  
13  
14 activity. We selected the 306,695 establishments coded as tobacco stores, grocery stores, gas  
15  
16 stations, and convenience stores and obtained geocoded data from the NAICS Association.  
17  
18

19  
20 Although some businesses classified as department stores, liquor stores, and pharmacies may sell  
21  
22 tobacco as well (e.g. Wal-Mart, Costco, CVS), they were not classified as tobacco outlets  
23  
24 because they also include many stores that do not sell tobacco (e.g. Sears, Dollar Stores, hospital  
25  
26 pharmacies), and the NAICS categories do not allow differentiation between sub-classes of  
27  
28 stores that do or do not sell tobacco.  
29  
30  
31  
32  
33

34 *Tobacco outlet density using adaptive bandwidth kernel density estimation:* A nationwide  
35  
36 density surface of the tobacco outlets using adaptive bandwidth kernel density estimation  
37  
38 (KDE)(36, 37) and the LandScan™ Global Population Database(38) was produced. Adaptive  
39  
40 bandwidth KDE accounts for the underlying population density by limiting the bandwidth of  
41  
42 each tobacco outlet to the surrounding population of 1000 people. Setting a limit constrains the  
43  
44 influence of a single outlet to a small spatial extent where the population density is high (urban  
45  
46 areas) while in rural areas the reach of the tobacco outlet is geographically larger. For sparsely  
47  
48 populated regions, the bandwidth of each tobacco outlet was limited to a 25 km radius to prevent  
49  
50 the density calculation from expanding to a spatially unreliable distance. The resultant density  
51  
52 surface covers the continental U.S. with pixels that are ~0.5 miles on each side and have a  
53  
54  
55  
56  
57  
58  
59  
60

1  
2  
3 density value in units of tobacco outlets per 1000 people. Each adolescent was assigned the  
4  
5 density value based on the pixel at their geocoded location.  
6  
7  
8  
9

10 *Distance to closest tobacco outlet:* ArcGIS Network Analyst (ESRI, Redlands, CA) was used to  
11  
12 compute the distance along the road network from the adolescent's geocoded location to the  
13  
14 closest tobacco outlet. Street data was obtained from the 2008 edition of StreetMap North  
15  
16 America,(39) which was created in 2005 and based on the ground conditions in 2003. Other  
17  
18 methods of measuring proximity were also considered, including Euclidian distance and driving  
19  
20 time. A sensitivity analysis demonstrated no difference between methods in the final model (data  
21  
22 not shown).  
23  
24  
25  
26  
27  
28

29 *Census tract measures of race/ethnicity and poverty:* Community characteristics that might be  
30  
31 confounders for tobacco outlet density and proximity were included. Using the U.S. Census 2000  
32  
33 data, the proportion population Black, the proportion population Hispanic, and the proportion of  
34  
35 families with income below the poverty level for each adolescent's census tract were calculated.  
36  
37  
38  
39  
40

#### 41 **Statistical analysis**

42  
43 Pearson correlation coefficients were used to describe the association among community  
44  
45 influences. Multiple logistic regression was used to assess the association between individual and  
46  
47 environmental risk factors and ever tried smoking, and multiple ordered logistic regression was  
48  
49 used to assess the odds of being higher on the frequency of smoking scale among smokers.  
50  
51 Because the majority of the sample resided in unique census tracts, it was not necessary to fit  
52  
53 hierarchical models. Instead, the environmental variables were entered as individual-level risk  
54  
55  
56  
57  
58  
59  
60

1  
2  
3 indicators of the adolescent's environment. Some variables (movie smoking exposure, sensation  
4 seeking, team sports participation, tobacco outlet density, distance to the closest outlet,  
5  
6 proportion population Black, proportion population Hispanic, and proportion families with  
7  
8 incomes below the poverty level) were skewed right. In order to limit the influence of high  
9  
10 outliers, values higher than the 95<sup>th</sup> percentile were trimmed to the 95<sup>th</sup> percentile. Additionally,  
11  
12 to allow a comparison of effect size among the variables, friend smoking, movie smoking  
13  
14 exposure, tobacco outlet density, proportion of families with incomes below the poverty level,  
15  
16 sensation seeking, and team sports participation were rescaled so that the lowest value was 0 and  
17  
18 the highest value was 1. This scaling procedure allowed a comparison between the dose-response  
19  
20 between individual/community measures and adolescent smoking. Ninety-five percent  
21  
22 confidence intervals were assessed based on two-tailed hypothesis assumptions.  
23  
24  
25  
26  
27  
28  
29  
30  
31

## 32 RESULTS

33  
34  
35  
36 *Individual and community characteristics:* Table 1 describes the characteristics of the  
37  
38 adolescents and their correlation with the two smoking outcomes. Thirty-six percent had tried  
39  
40 smoking, and this percentage increased across age categories from 18 to 56 percent in 13 and 18  
41  
42 year olds respectively. Among smokers, mean smoking intensity also increased with age. There  
43  
44 were no large differences in tried smoking prevalence across gender or race, but smoking  
45  
46 intensity was much lower among Black and Hispanic smokers compared with Whites and those  
47  
48 of mixed race. The correlation between community variables and smoking was an order of  
49  
50 magnitude lower than correlations with individual characteristics. Whereas tobacco outlet  
51  
52 density was positively correlated with trying smoking, it was negatively correlated with smoking  
53  
54  
55  
56  
57  
58  
59  
60

1  
2  
3  
4  
5  
6  
7  
8  
9  
10  
11  
12  
13  
14  
15  
16  
17  
18  
19  
20  
21  
22  
23  
24  
25  
26  
27  
28  
29  
30  
31  
32  
33  
34  
35  
36  
37  
38  
39  
40  
41  
42  
43  
44  
45  
46  
47  
48  
49  
50  
51  
52  
53  
54  
55  
56  
57  
58  
59  
60

intensity. The largest correlation for community predictors was -0.13, between proportion population Black and smoking intensity, also consistent with lower smoking intensity among minorities at the individual level.

For peer review only

Table 1. Individual and community risk factors and smoking outcomes (N=3646).

| Variable                          | n     | Proportion of Sample | Proportion Who Have Tried Smoking | Smoking Intensity Scale Mean |
|-----------------------------------|-------|----------------------|-----------------------------------|------------------------------|
| <b>Individual descriptors</b>     |       |                      |                                   |                              |
| <b>Categorical</b>                |       |                      |                                   |                              |
| Age                               |       |                      |                                   |                              |
| 13                                | 114   | 0.03                 | 0.18                              | 0.30                         |
| 14                                | 722   | 0.20                 | 0.24                              | 0.23                         |
| 15                                | 827   | 0.23                 | 0.29                              | 0.34                         |
| 16                                | 804   | 0.22                 | 0.37                              | 0.39                         |
| 17                                | 769   | 0.21                 | 0.43                              | 0.51                         |
| 18                                | 410   | 0.11                 | 0.56                              | 0.81                         |
| Gender                            |       |                      |                                   |                              |
| Male                              | 1,810 | 0.50                 | 0.38                              | 0.49                         |
| Female                            | 1,836 | 0.50                 | 0.34                              | 0.43                         |
| Race/ethnicity                    |       |                      |                                   |                              |
| White                             | 2,091 | 0.57                 | 0.36                              | 0.59                         |
| Black                             | 818   | 0.22                 | 0.32                              | 0.20                         |
| Hispanic                          | 481   | 0.13                 | 0.41                              | 0.29                         |
| Mixed race/other                  | 256   | 0.07                 | 0.38                              | 0.57                         |
| Sibling smokes                    |       |                      |                                   |                              |
| No                                | 2,924 | 0.80                 | 0.31                              | 0.43                         |
| Yes                               | 720   | 0.20                 | 0.56                              | 0.55                         |
| Friend smoking                    |       |                      |                                   |                              |
| None                              | 1,615 | 0.44                 | 0.17                              | 0.05                         |
| Some                              | 1,711 | 0.47                 | 0.45                              | 0.35                         |
| Most                              | 316   | 0.09                 | 0.78                              | 1.29                         |
| Ever smoked                       |       |                      |                                   |                              |
| No                                | 2,349 | 0.64                 |                                   |                              |
| Yes                               | 1,297 | 0.36                 |                                   |                              |
| <b>Continuous</b>                 |       |                      |                                   |                              |
| Smoking Intensity (among smokers) | 0     | 0,1                  |                                   |                              |
| Socioeconomic status              | 0.08  | -0.65,0.65           | -0.12                             | -0.03                        |
| Movie smoking exposure            | 558   | 285,883              | 0.21                              | 0.04                         |
| Team sports participation         | 1     | 0,2                  | -0.08                             | -0.14                        |
| Sensation seeking                 | 12    | 10,14                | 0.31                              | 0.25                         |

## Community descriptors

|                                             |      |           |       |       |
|---------------------------------------------|------|-----------|-------|-------|
| Tobacco outlet density (per 1000 people)    | 0.34 | 0.03,1.12 | 0.03  | -0.05 |
| Distance (mi) to nearest outlet             | 0.59 | 0.29,1.19 | 0.001 | 0.03  |
| Proportion population Black <sup>a</sup>    | 0.03 | 0.01,0.21 | -0.03 | -0.13 |
| Proportion population Hispanic <sup>a</sup> | 0.03 | 0.01,0.09 | 0.02  | -0.08 |
| Poverty <sup>a,b</sup>                      | 0.06 | 0.03,0.11 | 0.02  | -0.07 |

<sup>a</sup>For each adolescent's census tract.

<sup>b</sup>Proportion of families with income below the poverty level.

The community characteristics were also correlated with each other. Higher tobacco outlet density was associated with larger proportions of families with incomes below the poverty level, proportion of the population that was Black and Hispanic (Table 2). Tobacco outlet density decreased as distance to nearest outlet increased (correlation = -0.32), but the relationship was not linear. There was a wide range for distance to closest outlet among adolescents living in low tobacco outlet density areas, and a wide range of densities among adolescents living close to an outlet, justifying the consideration of both factors as being independently associated with smoking behavior.

Table 2. Correlation among the environmental descriptors.

| Environmental descriptor                      | Correlation |       |       |      |      |
|-----------------------------------------------|-------------|-------|-------|------|------|
|                                               | 1           | 2     | 3     | 4    | 5    |
| 1 Tobacco outlet density (per 1000 people)    | 1.00        |       |       |      |      |
| 2 Distance (mi) to nearest outlet             | -0.32       | 1.00  |       |      |      |
| 3 Proportion population Black <sup>a</sup>    | 0.27        | -0.17 | 1.00  |      |      |
| 4 Proportion population Hispanic <sup>a</sup> | 0.26        | -0.13 | -0.10 | 1.00 |      |
| 5 Poverty <sup>a,b</sup>                      | 0.39        | -0.12 | 0.52  | 0.38 | 1.00 |

<sup>a</sup>For each adolescent's census tract.

<sup>b</sup>Proportion of families with income below the poverty level.

*Relation with ever tried smoking:* Overall, 35.6 percent of respondents reported ever having tried a cigarette. Being male, being Hispanic, having sibling(s) who smoke, being of lower socioeconomic status, having friends who smoke, being older, having more exposure to movie smoking, not playing team sports, being higher in sensation seeking, and living in a neighborhood with higher tobacco outlet density were all significantly associated with ever trying smoking in the unadjusted models (Table 3). Two types of multivariate models were built to test these associations with ever trying smoking. In the first, only community-level factors

1  
2  
3 were included; it showed a significant inverse association with proportion of the population that  
4 was Black and a significant association with census tract poverty. In the second multivariate  
5 model, individual characteristics were added, which substantially improved model fit. Whereas  
6 most individual characteristics (sibling smoking, socioeconomic status, friend smoking, age,  
7 movie smoking exposure, team sports participation, and sensation seeking) were significantly  
8 associated with ever trying smoking in the second model, none of the community characteristics  
9 were significantly associated with ever trying smoking. Notably, the coefficient for tobacco  
10 outlet density changed little across models and, although small, remained close to statistical  
11 significance, in contrast to the other community predictors.  
12  
13  
14  
15  
16  
17  
18  
19  
20  
21  
22  
23  
24  
25  
26  
27  
28  
29  
30  
31  
32  
33  
34  
35  
36  
37  
38  
39  
40  
41  
42  
43  
44  
45  
46  
47  
48  
49  
50  
51  
52  
53  
54  
55  
56  
57  
58  
59  
60



Table 3. Crude and multivariate association with ever tried smoking.

| Variable                                                       | Crude Odds Ratio | Community only <sup>a</sup><br>n = 3,621 |            | All variables <sup>b</sup><br>n = 3,543 |            |
|----------------------------------------------------------------|------------------|------------------------------------------|------------|-----------------------------------------|------------|
|                                                                |                  | Adj Odds Ratio                           | 95% CI     | Adj Odds Ratio                          | 95% CI     |
| Individual characteristics                                     |                  |                                          |            |                                         |            |
| Categorical                                                    |                  |                                          |            |                                         |            |
| Gender                                                         |                  |                                          |            |                                         |            |
| Male                                                           | Ref              |                                          |            |                                         |            |
| Female                                                         | 0.84*            |                                          |            | 1.03                                    | 0.88,1.21  |
| Race/ethnicity                                                 |                  |                                          |            |                                         |            |
| White                                                          | Ref              |                                          |            |                                         |            |
| Black                                                          | 0.85             |                                          |            | 0.85                                    | 0.62,1.18  |
| Hispanic                                                       | 1.24*            |                                          |            | 1.18                                    | 0.88,1.59  |
| Mixed race/other                                               | 1.13             |                                          |            | 1.08                                    | 0.77,1.50  |
| Sibling smokes                                                 |                  |                                          |            |                                         |            |
| No                                                             | Ref              |                                          |            |                                         |            |
| Yes                                                            | 2.85*            |                                          |            | 2.13*                                   | 1.75,2.59  |
| Friend smoking                                                 |                  |                                          |            |                                         |            |
| None                                                           | Ref              |                                          |            |                                         |            |
| Some                                                           | 3.93*            |                                          |            | 2.60*                                   | 2.19,3.10  |
| Most                                                           | 17.14*           |                                          |            | 7.01*                                   | 5.05,9.74  |
| Continuous                                                     |                  |                                          |            |                                         |            |
| Age (for each additional year)                                 | 1.39*            |                                          |            | 1.23*                                   | 1.16,1.31  |
| Socioeconomic status                                           | 0.76*            |                                          |            | 0.82*                                   | 0.74,0.91  |
| Movie smoking exposure                                         | 5.14*            |                                          |            | 2.66*                                   | 1.95,3.63  |
| Team sports participation                                      | 0.59*            |                                          |            | 0.69*                                   | 0.54,0.89  |
| Sensation seeking                                              | 20.71*           |                                          |            | 7.72*                                   | 5.26,11.34 |
| Community characteristics                                      |                  |                                          |            |                                         |            |
| Tobacco outlet density (per 1000 people)                       | 1.30*            | 1.28                                     | 0.97,1.70  | 1.27                                    | 0.92,1.76  |
| Tobacco outlet proximity (distance in miles to nearest outlet) | 0.86             | 0.94                                     | 0.69,1.27  | 0.96                                    | 0.67,1.36  |
| Proportion population Black <sup>c</sup>                       | 0.80             | 0.59*                                    | 0.42,0.83  | 0.93                                    | 0.53,1.61  |
| Proportion population Hispanic <sup>c</sup>                    | 1.47             | 0.87                                     | 0.49,1.55  | 0.88                                    | 0.41,1.87  |
| Poverty <sup>c,d</sup>                                         | 2.06             | 3.66*                                    | 1.07,12.42 | 0.74                                    | 0.17,3.22  |

\*p&lt;0.05

<sup>a</sup>Pseudo R<sup>2</sup> = 0.003<sup>b</sup>Pseudo R<sup>2</sup> = 0.20<sup>c</sup>For each adolescent's census tract<sup>d</sup>Proportion of families with income below the poverty level

1  
2  
3  
4  
5  
6  
7  
8 *Relation with smoking intensity:* Most of the respondents who had tried smoking (73%) reported  
9  
10 no smoking in the past 30 days. Multivariate model results for smoking intensity among the  
11  
12 experimental smokers are reported in Table 4. Minority status, sibling smoking friend smoking,  
13  
14 age, team sports participation, sensation seeking, proportion population Black and Hispanic, and  
15  
16 poverty, were all associated with smoking intensity at the bivariate level. In the community-only  
17  
18 multivariate model, proportion population Black and Hispanic retained a significant inverse  
19  
20 relation with smoking intensity. In the full model, friend smoking, age, and sensation seeking  
21  
22 were all associated with higher intensity and being Black or Hispanic and participating in team  
23  
24 sports associated with lower intensity. None of the community characteristics retained a  
25  
26 statistically significant association with smoking intensity.  
27  
28  
29  
30  
31  
32

33 The tobacco outlet density—smoking association was not significantly different for those 18  
34  
35 years and older in either the tried smoking or the smoking intensity model. Additionally,  
36  
37 excluding subjects for whom Zip Code centroid was used as a proxy for home address had little  
38  
39 impact on the results.  
40  
41  
42  
43  
44  
45  
46  
47  
48  
49  
50  
51  
52  
53  
54  
55  
56  
57  
58  
59  
60

Table 4. Crude and multivariate association with smoking intensity among experimental smokers.

| Variable                                                       | Crude Odds Ratio | Community only <sup>a</sup><br>n = 1,289 |            | All variables <sup>b</sup><br>n = 1,263 |             |
|----------------------------------------------------------------|------------------|------------------------------------------|------------|-----------------------------------------|-------------|
|                                                                |                  | Adj Odds Ratio                           | 95% CI     | Adj Odds Ratio                          | 95% CI      |
| Individual characteristics                                     |                  |                                          |            |                                         |             |
| Categorical                                                    |                  |                                          |            |                                         |             |
| Gender                                                         |                  |                                          |            |                                         |             |
| Male                                                           | Ref              |                                          |            |                                         |             |
| Female                                                         | 0.89             |                                          |            | 0.99                                    | 0.75,1.30   |
| Race/ethnicity                                                 |                  |                                          |            |                                         |             |
| White                                                          | Ref              |                                          |            |                                         |             |
| Black                                                          | 0.29*            |                                          |            | 0.42*                                   | 0.22,0.81   |
| Hispanic                                                       | 0.47*            |                                          |            | 0.50*                                   | 0.30,0.83   |
| Mixed race/other                                               | 0.85             |                                          |            | 0.85                                    | 0.50,1.42   |
| Sibling smokes                                                 |                  |                                          |            |                                         |             |
| No                                                             | Ref              |                                          |            |                                         |             |
| Yes                                                            | 1.33*            |                                          |            | 1.08                                    | 0.81,1.45   |
| Friend smoking                                                 |                  |                                          |            |                                         |             |
| None                                                           | Ref              |                                          |            |                                         |             |
| Some                                                           | 9.11*            |                                          |            | 6.38*                                   | 3.29,12.39  |
| Most                                                           | 57.89*           |                                          |            | 32.98*                                  | 16.43,66.19 |
| Continuous                                                     |                  |                                          |            |                                         |             |
| Age (for each additional year)                                 | 1.37*            |                                          |            | 1.33*                                   | 1.20,1.48   |
| Socioeconomic status                                           | 0.98             |                                          |            | 0.98                                    | 0.82,1.17   |
| Movie smoking exposure                                         | 1.14             |                                          |            | 0.81                                    | 0.49,1.34   |
| Team sports participation                                      | 0.35*            |                                          |            | 0.46*                                   | 0.30,0.72   |
| Sensation seeking                                              | 14.55*           |                                          |            | 6.89*                                   | 3.42,13.88  |
| Community characteristics                                      |                  |                                          |            |                                         |             |
| Tobacco outlet density (per 1000 people)                       | 0.69             | 1.03                                     | 0.62,1.71  | 1.15                                    | 0.66,2.03   |
| Tobacco outlet proximity (distance in miles to nearest outlet) | 1.27             | 0.83                                     | 0.49,1.40  | 0.82                                    | 0.46,1.46   |
| Proportion population Black <sup>c</sup>                       | 0.23*            | 0.18*                                    | 0.09,0.37  | 0.97                                    | 0.33,2.84   |
| Proportion population Hispanic <sup>c</sup>                    | 0.24*            | 0.16*                                    | 0.05,0.45  | 0.35                                    | 0.09,1.42   |
| Poverty <sup>c,d</sup>                                         | 0.06*            | 2.31                                     | 0.25,21.15 | 0.78                                    | 0.05,11.43  |

\*p&lt;0.05

<sup>a</sup>Pseudo R<sup>2</sup> = 0.01<sup>b</sup>Pseudo R<sup>2</sup> = 0.14

1  
2  
3  
4  
5 °For each adolescent's census tract.  
6

---

7 °Proportion of families with income below the poverty level  
8

---

## 9 10 11 12 **DISCUSSION**

13  
14 This study highlights the much stronger association between individual health risk factors and  
15 youth smoking behavior compared to community risk factors. Two studies that have examined  
16 the relationship between tobacco outlet density or proximity and youth smoking have suggested  
17 that tobacco outlet density (but not proximity) is associated with youth smoking.<sup>(21, 22)</sup>

18  
19 Consistent with those studies, in the unadjusted model we saw a statistically significant  
20 association between tobacco outlet density and youth smoking, but not after accounting for  
21 additional community and individual risk factors for youth smoking. More importantly, the  
22 magnitudes of the community associations with youth smoking were small compared to  
23 individual risk factors. Thus, regardless of whether the association of tobacco outlet density  
24 reached accepted standards for statistical significance, the small potential effect across a broad  
25 range of tobacco outlet densities suggests that policies designed to lower density would have  
26 only a small impact on adolescent smoking. In contrast, the associations between team sports  
27 participation and both smoking outcomes were large enough to suggest that interventions and  
28 policies aiming to support those activities could help prevent adolescent smoking.  
29  
30  
31  
32  
33  
34  
35  
36  
37  
38  
39  
40  
41  
42  
43  
44  
45  
46  
47  
48  
49

50 This study used Bronfenbrenner's Ecological Systems Theory to frame the possible joint effects  
51 of individual-level, microsystem, mesosystem, and exosystem variables on youth smoking.  
52  
53 When variables were scaled so as to compare effect sizes, our findings indicated a relative  
54 importance of individual-level variables compared to the community variables we studied. We  
55  
56  
57  
58  
59  
60

1  
2  
3 suggest empirical multi-level studies pay attention to estimating effects that allow for such  
4 comparisons, in addition to focusing on statistical significance. Although we found no strong  
5 associations with smoking for the community variables studied, this study does not rule out the  
6 possibility that other neighborhood characteristics, such as measures of social capital or  
7 neighborhood smoking, may have an important impact on youth smoking. In fact, one study  
8 using the Brofenbrenner model found that neighborhood rates of youth smoking affected  
9 adolescent smoking trajectories, over and above individual risk factors.(40)

10  
11  
12  
13  
14  
15  
16  
17  
18  
19  
20  
21  
22 The association between some risk factors and smoking was present for trying smoking but not  
23 smoking intensity among experimental smokers, underlying the importance of modeling  
24 different smoking transitions separately. Trying smoking is strongly influenced by social risk  
25 factors (sibling smoking, friend smoking, movie smoking, and team sports participation). Among  
26 experimental smokers, smoking intensity continues to be associated with smoking by some  
27 social influence factors—peers, team sports, and exposure to tobacco marketing,(41, 42) but is  
28 also is predominantly driven by addiction processes.(43, 44) In this study, sensation seeking was  
29 a risk factor for both trying smoking and higher smoking intensity, consistent with other  
30 research.(45) Sensation seeking level probably captures, in part, biological characteristics that  
31 promote experience seeking(46) and tolerance of deviance,(47) but it may also be associated  
32 with higher sensitivity to the addictive influence of nicotine.(48) Given its large association with  
33 both smoking outcomes in this study, research on using sensation seeking to target high risk  
34 adolescents,(49) modifying risk factors that affect sensation seeking deserve greater emphasis.  
35  
36 For example, one study suggested that higher exposure to adult-rated movies resulted in higher  
37 growth in sensation seeking during adolescence.(50)

1  
2  
3  
4  
5  
6 Consistent with other studies that have distinguished between **trying** smoking and **smoking**  
7  
8 **intensity**,<sup>(51)</sup> some characteristics were associated with one outcome but not the other. Exposure  
9  
10 to smoking in movies was associated with **trying** smoking but not smoking intensity, consistent  
11  
12 with some other reports.<sup>(41, 42)</sup> Minority youth tried smoking at rates similar to White youth,  
13  
14 but minority ever smokers had much lower smoking intensity than Whites. This finding is not  
15  
16 surprising, given that minority adolescents have lower rates of smoking compared with  
17  
18 Whites,<sup>(52, 53)</sup> with larger temporal declines in smoking among Black adolescents<sup>(54)</sup> and  
19  
20 lower rates of progression to regular use.<sup>(55)</sup> Studies of **trying** smoking have been inconsistent,  
21  
22 with some confirming lower rates among minorities,<sup>(56)</sup> whereas others,<sup>(57)</sup> including this one,  
23  
24 did not. Why minority youth that try smoking have lower smoking intensity than Whites  
25  
26 deserves further research, given that the finding holds across studies;<sup>(52, 55)</sup> minority  
27  
28 adolescents could be less susceptible to nicotine addiction in its earliest stages **or social or family**  
29  
30 **circumstances could reduce the likelihood of progression of experimental smoking during**  
31  
32 **adolescence.**

33  
34  
35  
36  
37  
38  
39  
40  
41 This study was limited in that it relied on cross-sectional data and therefore cannot address  
42  
43 temporality. However, it would be unusual to see a **weak** correlation in a cross-sectional study  
44  
45 become a key predictor in a longitudinal one. The national scope of the study could be viewed as  
46  
47 a strength but precluded us from **directly assessing where tobacco outlets were in each**  
48  
49 **community.** Instead, we relied on available **commercial** data, subject to higher levels of error.  
50  
51  
52 Although this limitation could have widened confidence intervals due to random error, we have  
53  
54 no reason to believe that the error is larger in some neighborhoods than others, which would lead  
55  
56  
57  
58  
59  
60

1  
2  
3 to biased estimates. We suggest that, even if the results were statistically significant, the size of  
4  
5 the associations were still small for tobacco outlet density and the other community  
6  
7 characteristics we measured.  
8  
9

10  
11  
12 Compared to individual risk factors, tobacco outlet density might be less relevant for minors who  
13  
14 are legally constrained in their purchase of tobacco. One previous study of adolescent smoking  
15  
16 found no association for tobacco outlet density but a positive association between access—the  
17  
18 proportion of stores that illegally sell to minors—and youth smoking.<sup>(25)</sup> This suggests that  
19  
20 tobacco outlet density could be more important in determining smoking patterns among adults,  
21  
22 who are less constrained in their purchase of tobacco at retail outlets. Although we found no  
23  
24 evidence for that in the small number of adults present in this sample, further study in adult  
25  
26 samples may be indicated. Our study did not explicitly measure exposure to tobacco storefront  
27  
28 advertising in the context of community-level influences and therefore cannot address this issue  
29  
30 explicitly—we cannot rule out a storefront advertising influence without more elaborate  
31  
32 measurements of access to this particular aspect of tobacco retailing. Tobacco outlet density  
33  
34 should be a proxy for exposure to storefront advertising but would not capture individual  
35  
36 differences in how adolescents respond to or remember it, which could explain differences  
37  
38 between our findings and those of others who assessed recollection of storefront advertising.<sup>(58)</sup>  
39  
40 Finally, we studied tobacco density and proximity at the home, not the school. McCarthy et al.  
41  
42 looked at the relationship between tobacco retail density near schools and youth tobacco use and  
43  
44 found that the effects were limited to trying smoking (not established smoking), and only among  
45  
46 high school students in urban areas.<sup>(59)</sup> However, their work did not include the depth of  
47  
48 individual-level variables presented in this analysis. Future studies should consider the role of  
49  
50  
51  
52  
53  
54  
55  
56  
57  
58  
59  
60

1  
2  
3 school density and proximity to tobacco outlets around schools in context of individual risk  
4  
5 factors.  
6  
7  
8  
9

10 This study adds to the growing body of evidence that public health campaigns to prevent and  
11 reduce youth smoking should emphasize individual risk factors for smoking, including  
12 supporting participation in team sports, minimizing exposure to movie smoking, addressing the  
13 social influence of friend smoking, and addressing experience seeking among high sensation-  
14  
15 seekers.  
16  
17  
18  
19  
20  
21  
22  
23

24 **Acknowledgements** None.  
25

26  
27 **Funding** This work was supported by the National Institutes of Health CA77026 (James D.  
28 Sargent) and 1K23AG036934 (Ethan Berke).  
29  
30  
31

32 **Competing interests** None.  
33  
34  
35  
36  
37  
38  
39  
40  
41  
42  
43  
44  
45  
46  
47  
48  
49  
50  
51  
52  
53  
54  
55  
56  
57  
58  
59  
60



## REFERENCES

1. Sargent JD, Tanski S, Stoolmiller M, Hanewinkel R. Using sensation seeking to target adolescents for substance use interventions. *Addiction*. 2010;105(3):506-14. Epub 2010/04/21.
2. Stephenson MT, Helme DW. Authoritative parenting and sensation seeking as predictors of adolescent cigarette and marijuana use. *J Drug Education*. 2006;36(3):247-70.
3. Bauman KE, Foshee VA, Linzer MA, Koch GG. Effect of parental smoking classification on the association between parental and adolescent smoking. *Addict Behav*. 1990;15(5):413-22.
4. Conrad KM, Flay BR, Hill D. Why children start smoking cigarettes: predictors of onset. *Br J Addict*. 1992;87(12):1711-24.
5. Fleming CB, Kim H, Harachi TW, Catalano RF. Family processes for children in early elementary school as predictors of smoking initiation. *The Journal of adolescent health : official publication of the Society for Adolescent Medicine*. 2002;30(3):184-9.
6. Jackson C, Henriksen L. Do as I say: parent smoking, antismoking socialization, and smoking onset among children. *Addict Behav*. 1997;22(1):107-14.
7. Biglan A, Duncan TE, Ary DV, Smolkowski K. Peer and parental influences on adolescent tobacco use. *J Behav Med*. 1995;18(4):315-30.
8. Flay BR, Hu FB, Siddiqui O, Day LE, Hedeker D, Petraitis J, et al. Differential influence of parental smoking and friends' smoking on adolescent initiation and escalation of smoking. *J Health Soc Behav*. 1994;35(3):248-65.
9. DiFranza JR, Wellman RJ, Sargent JD, Weitzman M, Hipple BJ, Winickoff JP. Tobacco promotion and the initiation of tobacco use: assessing the evidence for causality. *Pediatrics*. 2006;117(6):e1237-48.
10. National Cancer Institute. The Role of the Media in Promoting and Reducing Tobacco Use. Tobacco Control Monograph No. 19. Bethesda, MD: U.S. Department of Health and Human Services, National Institutes of Health, National Cancer Institute. NIH Pub. No. 07-6242, 2008 June. Report No.
11. U.S. Department of Health and Human Services. Preventing Tobacco Use Among Youth and Young Adults: A Report of the Surgeon General. Atlanta, GA: U.S. Department of Health and Human Services, Centers for Disease Control and Prevention, National Center for Chronic Disease Prevention and Health Promotion, Office on Smoking and Health, 2012.
12. Adachi-Mejia AM, Primack BA, Beach ML, Titus-Ernstoff L, Longacre MR, Weiss JE, et al. Influence of movie smoking exposure and team sports participation on established smoking. *Arch Pediatr Adolesc Med*. 2009;163(7):638-43. Epub 2009/07/08.
13. Brown KS, Cameron R, Madill C, Payne ME, Filsinger S, Manske SR, et al. Outcome evaluation of a high school smoking reduction intervention based on extracurricular activities. *Prev Med*. 2002;35(5):506-10. Epub 2002/11/15.
14. Shilts L. The relationship of early adolescent substance use to extracurricular activities, peer influence, and personal attitudes. *Adolescence*. 1991;26(103):613-7. Epub 1991/01/01.
15. Terry-McElrath YM, O'Malley PM. Substance use and exercise participation among young adults: parallel trajectories in a national cohort-sequential study. *Addiction*. 2011;106(10):1855-65; discussion 66-7. Epub 2011/05/13.
16. Terry-McElrath YM, O'Malley PM, Johnston LD. Exercise and substance use among American youth, 1991-2009. *Am J Prev Med*. 2011;40(5):530-40. Epub 2011/04/19.

17. Perry CL. Results of prevention programs with adolescents. *Drug Alcohol Depend.* 1987;20(1):13-9.
18. Master Settlement Agreement. <http://www.naag.org/issues/tobacco/index.php?sdpid=919>. 1998 [June 16, 2005]; Available from: <http://www.naag.org/issues/tobacco/index.php?sdpid=919>.
19. Feighery EC, Henriksen L, Wang Y, Schleicher NC, Fortmann SP. An evaluation of four measures of adolescents' exposure to cigarette marketing in stores. *Nicotine Tob Res.* 2006;8(6):751-9. Epub 2006/11/30.
20. Henriksen L, Feighery EC, Schleicher NC, Fortmann SP. Receptivity to alcohol marketing predicts initiation of alcohol use. *The Journal of adolescent health : official publication of the Society for Adolescent Medicine.* 2008;42(1):28-35.
21. Novak SP, Reardon SF, Raudenbush SW, Buka SL. Retail tobacco outlet density and youth cigarette smoking: a propensity-modeling approach. *Am J Public Health.* 2006;96(4):670-6. Epub 2006/03/02.
22. Henriksen L, Feighery EC, Schleicher NC, Cowling DW, Kline RS, Fortmann SP. Is adolescent smoking related to the density and proximity of tobacco outlets and retail cigarette advertising near schools? *Prev Med.* 2008;47(2):210-4. Epub 2008/06/12.
23. Ogneva-Himmelberger Y, Ross L, Burdick W, Simpson SA. Using geographic information systems to compare the density of stores selling tobacco and alcohol: youth making an argument for increased regulation of the tobacco permitting process in Worcester, Massachusetts, USA. *Tob Control.* 2010;19(6):475-80. Epub 2010/09/08.
24. West JH, Blumberg EJ, Kelley NJ, Hill L, Sipan CL, Schmitz KE, et al. Does proximity to retailers influence alcohol and tobacco use among Latino adolescents? *J Immigr Minor Health.* 2010;12(5):626-33. Epub 2009/11/26.
25. Pokorny SB, Jason LA, Schoeny ME. The relation of retail tobacco availability to initiation and continued smoking. *J Clin Child Adolesc Psychol.* 2003;32(2):193-204.
26. Peterson NA, Lowe JB, Reid RJ. Tobacco outlet density, cigarette smoking prevalence, and demographics at the county level of analysis. *Subst Use Misuse.* 2005;40(11):1627-35. Epub 2005/10/29.
27. Schneider JE, Reid RJ, Peterson NA, Lowe JB, Hughey J. Tobacco outlet density and demographics at the tract level of analysis in Iowa: implications for environmentally based prevention initiatives. *Prev Sci.* 2005;6(4):319-25. Epub 2005/09/16.
28. Yu D, Peterson NA, Sheffer MA, Reid RJ, Schnieder JE. Tobacco outlet density and demographics: analysing the relationships with a spatial regression approach. *Public Health.* 2010;124(7):412-6. Epub 2010/06/15.
29. Hyland A, Travers MJ, Cummings KM, Bauer J, Alford T, Wiczorek WF. Tobacco outlet density and demographics in Erie County, New York. *Am J Public Health.* 2003;93(7):1075-6. Epub 2003/07/02.
30. Cohen JE, Anglin L. Outlet density: a new frontier for tobacco control. *Addiction.* 2009;104(1):2-3. Epub 2009/01/13.
31. Bronfenbrenner U. Toward an experimental ecology of human development. *American Psychologist.* 1977;32(7):513-31.
32. Bronfenbrenner U. The ecology of developmental processes. In: W. Damon, RM Lerner, editors. *Handbook of Child Psychology.* 5 ed. New York: John Wiley & Sons, Inc.; 1998. p. 993-1028.
33. Bronfenbrenner U. Developmental Research, Public Policy, and the Ecology of Childhood. *Child Dev.* 1974;45(1):1-5.
34. Sargent J, Beach M, Adachi-Mejia A, Gibson J, Titus-Ernstoff L, Carusi C, et al. Exposure to movie smoking: Its relation to smoking initiation among U.S. adolescents. *Pediatrics.* 2005;116(5):1183-91.

- 1  
2  
3 35. Sargent JD, Worth KA, Beach M, Gerrard M, Heatherton TF. Population-Based  
4 Assessment of Exposure to Risk Behaviors in Motion Pictures. *Commun Methods Meas*.  
5 2008;2(1-2):134-51. Epub 2009/01/06.
- 6 36. Carlos HA, Shi X, Sargent J, Tanski S, Berke EM. Density estimation and adaptive  
7 bandwidths: a primer for public health practitioners. *Int J Health Geogr*. 2010;9:39. Epub  
8 2010/07/27.
- 9 37. Shi X. Selection of bandwidth type and adjustment side in kernel density estimation over  
10 inhomogenous backgrounds. *International Journal of Geographic Information Science*.  
11 2010;24(5):643-60.
- 12 38. Oak Ridge National Laboratory. LandScan Global Population Database. Oak Ridge, TN  
13 [4/2/11]; Available from: <http://www.ornl.gov/landscan/>.
- 14 39. Esri. Esri StreetMap Premium - Advanced Geocoding, Routing, and Cartography.  
15 Redlands, CA [4/2/11]; Available from: <http://www.esri.com/data/streetmap/index.html>.
- 16 40. Ennett ST, Foshee VA, Bauman KE, Hussong A, Faris R, Hipp JR, et al. A social  
17 contextual analysis of youth cigarette smoking development. *Nicotine Tob Res*. 2010;12(9):950-  
18 62. Epub 2010/08/07.
- 19 41. Sargent JD, Gibson J, Heatherton TF. Comparing the effects of entertainment media  
20 and tobacco marketing on youth smoking. *Tob Control*. 2009;18(1):47-53.
- 21 42. Sargent JD, Hanewinkel R. Comparing the effects of entertainment media and tobacco  
22 marketing on youth smoking in Germany. *Addiction*. 2009;104:815-23.
- 23 43. DiFranza JR, Rigotti NA, McNeill AD, Ockene JK, Savageau JA, St Cyr D, et al. Initial  
24 symptoms of nicotine dependence in adolescents. *Tob Control*. 2000;9(3):313-9.
- 25 44. DiFranza JR, Savageau JA, Fletcher K, Ockene JK, Rigotti NA, McNeill AD, et al.  
26 Measuring the loss of autonomy over nicotine use in adolescents: the DANDY (Development  
27 and Assessment of Nicotine Dependence in Youths) study. *Arch Pediatr Adolesc Med*.  
28 2002;156(4):397-403.
- 29 45. Skara S, Sussman S, Dent CW. Predicting regular cigarette use among continuation  
30 high school students. *Am J Health Behav*. 2001;25(2):147-56. Epub 2001/04/12.
- 31 46. Zuckerman M. Behavioral expressions and biosocial bases of sensation seeking. New  
32 York: Cambridge University Press; 1994.
- 33 47. Newcomb MD, McGee L. Influence of sensation seeking on general deviance and  
34 specific problem behaviors from adolescence to young adulthood. *J Pers Soc Psychol*.  
35 1991;61(4):614-28. Epub 1991/10/01.
- 36 48. Perkins KA, Gerlach D, Broge M, Grobe JE, Wilson A. Greater sensitivity to subjective  
37 effects of nicotine in nonsmokers high in sensation seeking. *Exp Clin Psychopharmacol*.  
38 2000;8(4):462-71. Epub 2000/12/29.
- 39 49. Conrod PJ, Castellanos N, Mackie C. Personality-targeted interventions delay the  
40 growth of adolescent drinking and binge drinking. *J Child Psychol Psychiatry*. 2008;49(2):181-  
41 90. Epub 2008/01/24.
- 42 50. Stoolmiller M, Gerrard M, Sargent JD, Worth KA, Gibbons FX. R-rated movie viewing,  
43 growth in sensation seeking and alcohol initiation: reciprocal and moderation effects. *Prev Sci*.  
44 2010;11(1):1-13. Epub 2009/08/06.
- 45 51. Robinson LA, Murray DM, Alfano CM, Zbikowski SM, Blitstein JL, Klesges RC. Ethnic  
46 differences in predictors of adolescent smoking onset and escalation: A longitudinal study from  
47 7th to 12th grade. *Nicotine & Tobacco Research*. 2006;8(2):297-307.
- 48 52. Bachman JG, Wallace JM, Jr., O'Malley PM, Johnston LD, Kurth CL, Neighbors HW.  
49 Racial/Ethnic differences in smoking, drinking, and illicit drug use among American high school  
50 seniors, 1976-89. *Am J Public Health*. 1991;81(3):372-7.
- 51 53. Lewis PC, Harrell JS, Bradley C, Deng S. Cigarette use in adolescents: the  
52 Cardiovascular Health in Children and Youth Study. *ResNursHealth*. 2001;24(1):27-37.
- 53  
54  
55  
56  
57  
58  
59  
60

- 1  
2  
3 54. Nelson MC, Gordon-Larsen P. Physical activity and sedentary behavior patterns are  
4 associated with selected adolescent health risk behaviors. *Pediatrics*. 2006;117(4):1281-90.  
5 55. Flint AJ, Yamada EG, Novotny TE. Black-white differences in cigarette smoking uptake:  
6 progression from adolescent experimentation to regular use. *Prev Med*. 1998;27(3):358-64.  
7 56. Headen SW, Bauman KE, Deane GD, Koch GG. Are the correlates of cigarette smoking  
8 initiation different for black and white adolescents? *Am J Public Health*. 1991;81(7):854-8.  
9 57. Jackson C, Brown JD, L'Engle KL. R-rated movies, bedroom televisions, and initiation of  
10 smoking by white and black adolescents. *Arch Pediatr Adolesc Med*. 2007;161(3):260-8.  
11 58. Henriksen L, Feighery EC, Wang Y, Fortmann SP. Association of retail tobacco  
12 marketing with adolescent smoking. *Am J Public Health*. 2004;94(12):2081-3.  
13 59. McCarthy WJ, Mistry R, Lu Y, Patel M, Zheng H, Dietsch B. Density of tobacco retailers  
14 near schools: effects on tobacco use among students. *Am J Public Health*. 2009;99(11):2006-  
15 13. Epub 2009/10/13.  
16  
17  
18  
19  
20  
21  
22  
23  
24  
25  
26  
27  
28  
29  
30  
31  
32  
33  
34  
35  
36  
37  
38  
39  
40  
41  
42  
43  
44  
45  
46  
47  
48  
49  
50  
51  
52  
53  
54  
55  
56  
57  
58  
59  
60



**A comparison of individual versus community influences on youth smoking behaviors: A cross-sectional observational study**

|                                 |                                                                                                                                                                                                                                                                                                                                                                                                                                                                                                                                                                                                                                                         |
|---------------------------------|---------------------------------------------------------------------------------------------------------------------------------------------------------------------------------------------------------------------------------------------------------------------------------------------------------------------------------------------------------------------------------------------------------------------------------------------------------------------------------------------------------------------------------------------------------------------------------------------------------------------------------------------------------|
| Journal:                        | <i>BMJ Open</i>                                                                                                                                                                                                                                                                                                                                                                                                                                                                                                                                                                                                                                         |
| Manuscript ID:                  | bmjopen-2011-000767.R2                                                                                                                                                                                                                                                                                                                                                                                                                                                                                                                                                                                                                                  |
| Article Type:                   | Research                                                                                                                                                                                                                                                                                                                                                                                                                                                                                                                                                                                                                                                |
| Date Submitted by the Author:   | 27-Jul-2012                                                                                                                                                                                                                                                                                                                                                                                                                                                                                                                                                                                                                                             |
| Complete List of Authors:       | Adachi-Mejia, Anna; The Geisel School of Medicine at Dartmouth, Pediatrics; Norris Cotton Cancer Center, Cancer Control Research Program<br>Carlos, Heather; Dartmouth-Hitchcock Norris Cotton Cancer Center,<br>Berke, Ethan; The Dartmouth Institute of Health Policy and Clinical<br>Practice, ; Norris Cotton Cancer Center, Cancer Control Research Program<br>Tanski, Susanne; The Geisel School of Medicine at Dartmouth, Pediatrics;<br>Norris Cotton Cancer Center, Cancer Control Research Program<br>Sargent, James; The Geisel School of Medicine at Dartmouth, Pediatrics;<br>Norris Cotton Cancer Center, Cancer Control Research Program |
| <b>Primary Subject Heading</b>: | Public health                                                                                                                                                                                                                                                                                                                                                                                                                                                                                                                                                                                                                                           |
| Secondary Subject Heading:      | Smoking and tobacco, Health policy, Public health, Paediatrics, Addiction                                                                                                                                                                                                                                                                                                                                                                                                                                                                                                                                                                               |
| Keywords:                       | PREVENTIVE MEDICINE, Community child health < PAEDIATRICS, PUBLIC HEALTH                                                                                                                                                                                                                                                                                                                                                                                                                                                                                                                                                                                |
|                                 |                                                                                                                                                                                                                                                                                                                                                                                                                                                                                                                                                                                                                                                         |

SCHOLARONE™  
Manuscripts

only

1  
2  
3 **A comparison of individual versus community influences on youth smoking behaviors: A**  
4 **cross-sectional observational study**  
5  
6

7 Anna M. Adachi-Mejia, Ph.D.<sup>a,b,c,d</sup>  
8 Heather A. Carlos<sup>b</sup>  
9 Ethan M. Berke, M.D., M.P.H.<sup>c,d,e</sup>  
10 Susanne E. Tanski, M.D.<sup>a,b,c</sup>  
11 James D. Sargent, M.D.<sup>a,b,c</sup>  
12  
13

14  
15  
16 <sup>a</sup>Pediatrics, The Geisel School of Medicine at Dartmouth, Lebanon, NH, USA

17 <sup>b</sup>Dartmouth-Hitchcock Norris Cotton Cancer Center, Lebanon, NH, USA

18 <sup>c</sup>Cancer Control Research Program, Norris Cotton Cancer Center, Lebanon, NH, USA

19 <sup>d</sup>The Dartmouth Institute of Health Policy and Clinical Practice, Lebanon, NH, USA

20 <sup>e</sup>Community & Family Medicine, The Geisel School of Medicine at Dartmouth, Hanover, NH,  
21 USA  
22  
23

24  
25 Correspondence concerning this article should be addressed to: Anna M. Adachi-Mejia, Ph.D.,  
26 HB 7925, Cancer Control Research Program, Dartmouth-Hitchcock Norris Cotton Cancer  
27 Center, Lebanon, NH 03756, USA; Tel (603) 653-6124, Fax (603) 653-9090, E-mail:  
28 [anna.adachi-mejia@dartmouth.edu](mailto:anna.adachi-mejia@dartmouth.edu)  
29

30 Contributorship statement: All authors 1) made substantial contributions to conception and  
31 design, acquisition of data, or analysis and interpretation of data; 2) drafted the article or revised  
32 it critically for important intellectual content; 3) approved of the final version to be published.  
33  
34

35 Words: 3945

36 Tables: 4

37 Figures: 0  
38  
39

40 Key words: Smoking, youth, tobacco outlet density, policy, GIS  
41  
42  
43  
44  
45  
46  
47  
48  
49  
50  
51  
52  
53  
54  
55  
56  
57  
58  
59  
60



## ABSTRACT

**Objectives** To compare individual with community risk factors for adolescent smoking.

**Design** A cross-sectional observational study with multivariate analysis.

**Setting** National telephone survey.

**Participants** 3646 US adolescents aged 13-18 years in 2007 recruited through a random digital survey.

**Outcome measures** Ever tried smoking and, among experimental smokers, smoking intensity (based on smoking in past 30 days).

**Results** One-third of participants (35.6%, N=1297) had tried smoking. After controlling for individual risk factors, neither tobacco outlet density nor proximity were associated with tried smoking or smoking intensity. Associations with trying smoking included age (Adjusted Odds Ratio [AOR] = 1.23, 95% CI 1.16, 1.31), lower socioeconomic status (AOR = 0.82, 95% CI 0.74, 0.91), sibling smoking (AOR=2.13, 95% CI 1.75, 2.59), friend smoking (AOR = 2.60, 95% CI 2.19, 3.10 for some and AOR = 7.01, 95% CI 5.05,9.74 for most), movie smoking exposure (AOR = 2.66, 95% CI 1.95, 3.63), team sports participation (AOR = 0.69, 95% CI 0.54, 0.89) and sensation seeking (AOR = 7.72, 95% CI 5.26, 11.34). Among experimental smokers, age (AOR = 1.32, 95% CI 1.21, 1.44), minority status (AOR = 0.48, 95% CI 0.30, 0.79 for Black; AOR = 0.46, 95% CI 0.31, 0.69 for Hispanic; AOR = 0.53, 95% CI 0.43, 0.85 for Mixed race/other), friend smoking (AOR = 3.37, 95% CI 2.37,4.81 for some; AOR = 20.27, 95% CI 13.22,31.08 for most), team sports participation (AOR = 0.38, 95% CI 0.26, 0.55), and sensation seeking (AOR = 6.57, 95% CI 3.71, 11.64) were associated with smoking intensity.

**Conclusions** The study suggests that interventions and policies to prevent and reduce youth smoking should focus on individual risk factors for smoking, including supporting participation

1  
2  
3  
4  
5  
6  
7  
8  
9  
10  
11  
12  
13  
14  
15  
16  
17  
18  
19  
20  
21  
22  
23  
24  
25  
26  
27  
28  
29  
30  
31  
32  
33  
34  
35  
36  
37  
38  
39  
40  
41  
42  
43  
44  
45  
46  
47  
48  
49  
50  
51  
52  
53  
54  
55  
56  
57  
58  
59  
60

in team sports, minimizing exposure to movie smoking, addressing the social influence of friend smoking, and addressing experience seeking among high sensation-seekers.

For peer review only



## INTRODUCTION

Preventing adolescent smoking is a key public health imperative. Individual risk factors for youth smoking have been studied for decades. They include personality factors such as sensation seeking,(1, 2) and other social influences like parent(3-6) and friend(7, 8) smoking. They also include exposure to tobacco marketing(9) and smoking in entertainment media(10), which were both considered causal risk factors in a recent (2012) Surgeon General's report on smoking in adolescents and young adults.(11) Research has shown that extracurricular activities, such as team sports participation, are associated with preventing youth smoking.(12-16) Knowledge about these risk factors has informed interventions aiming to minimize adolescents' responsiveness to social risk factors(17) and policies to minimize adolescent's exposure to tobacco marketing and movies.(18)

In addition to individual risk factors, community influences such as frequent exposure to tobacco outlets(19) and tobacco outlet density,(20, 21) have been associated with youth smoking.

Compared to the compelling research on individual risk factors, evidence for community influence is mixed. Studies to date have been regional, have not extensively controlled for individual characteristics, and have applied varying approaches to density measurement.(21-24)

To our knowledge, studies have not yet tested whether the association between tobacco outlet density and proximity is confounded by race or social influences like sibling and friend smoking.

One study that controlled for individual sociodemographics failed to find an association between tobacco outlet density and youth smoking.(25)

1  
2  
3 Another area to consider in the context of tobacco outlet density and proximity is their  
4  
5 association with neighborhood characteristics, such as poverty, that may also pose a community  
6  
7 risk factor for smoking. Many studies show an association between tobacco outlet density and  
8  
9 neighborhoods characterized by high percentages of minorities(21, 23, 26-29) and low  
10  
11 income,(21, 23, 27-29) although this finding has not been consistent across regions.(26) Thus,  
12  
13 the finding that tobacco outlet density is related to youth smoking could also be confounded by  
14  
15 community factors. Nevertheless, the literature was robust enough for Cohen et al. to propose  
16  
17 policies to limit tobacco outlet density to reduce youth smoking,(30) raising the question of  
18  
19 whether individual or community-level factors have greater potential to prevent youth smoking.  
20  
21  
22  
23  
24  
25  
26

27 This study examines the role of access to tobacco outlets on youth smoking in a national sample  
28  
29 of U.S. adolescents. By access, we mean approaching, entering, exiting, and having exposure to  
30  
31 information imparted to potential customers about tobacco products, including visibility of in-  
32  
33 store and storefront advertising. Our focus is twofold—to assess the multivariate association with  
34  
35 youth smoking after controlling for other individual and community risk factors, and to compare  
36  
37 the sizes of these associations. It is the first to consider the role of community-level factors on  
38  
39 adolescent smoking in the U.S. nationwide, and the first to jointly examine individual social and  
40  
41 media influence risk factors with community-level factors. The intent of this work is to inform  
42  
43 interventional research and policies related to tobacco control efforts directed at youth.  
44  
45  
46  
47  
48  
49

## 50 **METHODS**

### 51 **Theoretical Framework**

52  
53  
54  
55  
56  
57  
58  
59  
60

1  
2  
3 This study is guided by Bronfenbrenner's Ecological Systems Theory,(31-33) which posits that  
4 development, health and well-being are situated within and shaped by the interactions that occur  
5  
6 between the individual and the four systems: microsystem (immediate environment),  
7  
8 mesosystem (connections between immediate environments, e.g., tobacco outlet density and  
9  
10 proximity), exosystem (indirect external environmental settings), and macrosystem (larger  
11  
12 cultural context).(31-33) For this study, we include individual-level variables that are well-  
13  
14 established risk factors for smoking: gender, race/ethnicity, socioeconomic status, and the  
15  
16 personality characteristic of sensation seeking. We also include the microsystem variables of  
17  
18 friend smoking, sibling smoking, exposure to smoking in movies, and team sports participation.  
19  
20 Our mesosystem variables include tobacco outlet density and distance to closest tobacco outlet.  
21  
22 Our exosystem variables include proportion population Black, proportion population Hispanic,  
23  
24 and proportion of families with income below the poverty level.  
25  
26  
27  
28  
29  
30  
31  
32  
33

### 34 **Sample Recruitment**

35  
36 A detailed description of the recruitment methods for study participants has been published  
37  
38 previously.(34) Briefly, between June and October 2003, 6522 U.S. adolescents aged 10-14  
39  
40 years were recruited through a random digit-dial telephone survey, which captured a  
41  
42 representative sample of U.S. adolescents. Five follow-up surveys were conducted at 8-month  
43  
44 intervals. This study involves the fifth follow-up survey conducted in the fall of 2007.  
45  
46 Interviewers successfully contacted 3055 (47%) of the original 6522 adolescents for this round.  
47  
48 Loss to follow up was higher among Blacks, older adolescents, those of lower socioeconomic  
49  
50 status, baseline smokers and higher sensation seekers. To address the minority attrition, a sample  
51  
52 of 598 Black adolescents (in the same age range) were recruited through lists of residential  
53  
54  
55  
56  
57  
58  
59  
60

1  
2  
3 numbers for U.S. census tracts for which African-Americans represented 20% or more of the  
4 population, resulting in available sample of 3653 for this study. Parental consent and adolescent  
5 assent were required for participation. The study was approved by the Committee for the  
6 Protection of Human Subjects at Dartmouth Medical School. The 3653 subjects lived in 3456  
7 unique census tracts, of which the majority (95.5%) contained only 1 subject; 144 tracts (4.2%)  
8 contained two subjects, and 11 tracts (0.3%) contained three subjects. Most adolescent  
9 residential locations were geocoded to their home street address (N=3167). When home street  
10 address was not available, they were geocoded to their ZIP code centroid (N=479), resulting in a  
11 final sample size of N=3646 for this study. We used a complete case analysis approach because  
12 only 110 subjects (3%) were missing data from one or more variables. The dependent and  
13 independent variables include dichotomous, polychotomous and continuous variables. Three  
14 variables (smoking intensity, socioeconomic status, and sensation seeking) are scales derived  
15 from two or more items, constructed using the “alpha, gen(varlist)” command in Stata 12. The  
16 sections below describe how we ascertained the information, constructed the variables, handled  
17 outliers, and rescaled the variables in order to compare the associations in our analytical models.  
18  
19  
20  
21  
22  
23  
24  
25  
26  
27  
28  
29  
30  
31  
32  
33  
34  
35  
36  
37  
38  
39  
40

### 41 **Outcome Variables**

42  
43 *Ever tried smoking:* Respondents were asked, “How many cigarettes have you smoked in your  
44 life” and those who responded “none” were categorized as never smokers. Those who responded  
45 in a category that indicated lifetime smoking were then asked about past 30 day smoking  
46 intensity.  
47  
48  
49  
50  
51  
52  
53  
54  
55  
56  
57  
58  
59  
60

1  
2  
3  
4  
5  
6  
7  
8  
9  
10  
11  
12  
13  
14  
15  
16  
17  
18  
19  
20  
21  
22  
23  
24  
25  
26  
27  
28  
29  
30  
31  
32  
33  
34  
35  
36  
37  
38  
39  
40  
41  
42  
43  
44  
45  
46  
47  
48  
49  
50  
51  
52  
53  
54  
55  
56  
57  
58  
59  
60

*Smoking intensity:* Smoking intensity was based on a composite measure using two items (alpha = 0.82): “During the past 30 days, on how many days did you smoke cigarettes?” (none, 1-10 days, 11-29 days, or every day); “How many cigarettes have you smoked in your life?” (none, a few puffs, one to 19 cigarettes, 20-100 cigarettes, more than 100 cigarettes). This measure had whole number values ranging from 1 to 7. We have used this measure in previously published work.(35)

### **Individual risk factors**

*Sociodemographics:* Individual measures of age, race and ethnicity were included.

Socioeconomic status (SES) was assessed using a standardized composite measure based on parent reports of their own education and household income (alpha = 0.69). The variable was centered around zero and a 1-point increase corresponded to a 1 standard deviation increase in SES.

*Sibling smoking:* Sibling smoking was assessed with the question, “Do any of your older brothers or sisters smoke cigarettes? (Yes, No)”

*Friend smoking:* Friend smoking was assessed with the question, “How many of your friends smoke cigarettes? Your choices are none, some, or most.”

*Exposure to movie smoking:* Adolescents’ exposure to movie smoking was estimated using the Beach method(36) for top U.S. box-office hits from 2000-2006 (n = 384). Movies were content-

1  
2  
3 coded for smoking using previously validated methods.(36) Each adolescent survey was  
4  
5 programmed to randomly select 50 movie titles from the larger pool of 384 movies; respondents  
6  
7 were asked whether they had ever seen each movie title. To create a measure of exposure to  
8  
9 movie smoking, the number of smoking occurrences in films each adolescent had seen from  
10  
11 his/her unique list of 50 movies were summed. A proportion was generated by dividing this  
12  
13 number by the number of smoking occurrences that the adolescent would have seen had all 50  
14  
15 movies in the unique list been viewed and this proportion was multiplied by the number of  
16  
17 smoking occurrences in the entire parent sample of 384 movies.  
18  
19  
20  
21  
22  
23

24  
25 *Team sports participation:* Team sports participation was assessed with a single item, “Now I’d  
26  
27 like you to think about all the sports teams you played on during the past 12 months, including  
28  
29 all school, community or recreational teams. How many sports teams did you play on in the past  
30  
31 12 months?” Team sports participation was skewed right, with responses ranging up to 12, with  
32  
33 4 at the 95<sup>th</sup> percentile.  
34  
35  
36  
37  
38

39  
40 *Sensation seeking:* Sensation seeking propensity was assessed using a short 5-item measure: “I  
41  
42 would like to explore strange places,” “I like to do frightening things,” “I like new and exciting  
43  
44 experiences, even if I have to break the rules,” “I like to listen to loud music,” “I like to do  
45  
46 dangerous things.” Each of these items had the following response categories for each statement:  
47  
48 Strongly Agree, Disagree, Agree, Strongly Agree. These items had a Cronbach's alpha ( $\alpha$ ) of  
49  
50 0.70. The sensation seeking scale ranged from 0 to 15 with 12 at the 95<sup>th</sup> percentile.  
51  
52  
53  
54

## 55 **Community influences**

56  
57  
58  
59  
60

1  
2  
3  
4  
5  
6 *Tobacco outlets:* To obtain a national dataset for tobacco outlets, we reviewed North American  
7  
8 Industry Classification System (NAICS) codes from 2007 and selected establishments that were  
9  
10 likely to sell tobacco products. The Office of Management and Budget (OMB) developed  
11  
12 NAICS for use by Federal statistical agencies in classifying all business establishments based on  
13  
14 their primary activity. We selected the 306,695 establishments coded as tobacco stores, grocery  
15  
16 stores, gas stations, and convenience stores and obtained geocoded data from the NAICS  
17  
18 Association. Although some businesses classified as department stores, liquor stores, and  
19  
20 pharmacies may sell tobacco as well (e.g. Wal-Mart, Costco, CVS), they were not classified as  
21  
22 tobacco outlets because they also include many stores that do not sell tobacco (e.g. Sears, Dollar  
23  
24 Stores, hospital pharmacies), and the NAICS categories do not allow differentiation between  
25  
26 sub-classes of stores that do or do not sell tobacco.  
27  
28  
29  
30  
31  
32  
33

34 *Tobacco outlet density using adaptive bandwidth kernel density estimation:* A nationwide  
35  
36 density surface of the tobacco outlets using adaptive bandwidth kernel density estimation  
37  
38 (KDE)(37, 38) and the LandScan™ Global Population Database(39) was produced. Adaptive  
39  
40 bandwidth KDE accounts for the underlying population density by limiting the bandwidth of  
41  
42 each tobacco outlet to the surrounding population of 1000 people. Setting a limit constrains the  
43  
44 influence of a single outlet to a small spatial extent where the population density is high (urban  
45  
46 areas) while in rural areas the reach of the tobacco outlet is geographically larger. For sparsely  
47  
48 populated regions, the bandwidth of each tobacco outlet was limited to a 25 km radius to prevent  
49  
50 the density calculation from expanding to a spatially unreliable distance. The resultant density  
51  
52 surface covers the continental U.S. with pixels that are ~0.5 miles on each side and have a  
53  
54  
55  
56  
57  
58  
59  
60

1  
2  
3 density value in units of tobacco outlets per 1000 people. Each adolescent was assigned the  
4  
5 density value based on the pixel at their geocoded location.  
6  
7  
8  
9

10 *Distance to closest tobacco outlet:* ArcGIS Network Analyst (ESRI, Redlands, CA) was used to  
11  
12 compute the distance along the road network from the adolescent's geocoded location to the  
13  
14 closest tobacco outlet. Street data was obtained from the 2008 edition of StreetMap North  
15  
16 America,(40) which was created in 2005 and based on the ground conditions in 2003. Other  
17  
18 methods of measuring proximity were also considered, including Euclidian distance and driving  
19  
20 time. A sensitivity analysis demonstrated no difference between methods in the final model (data  
21  
22 not shown).  
23  
24  
25  
26  
27  
28

29 *Census tract measures of race/ethnicity and poverty:* Community characteristics that might be  
30  
31 confounders for tobacco outlet density and proximity were included. Using the U.S. Census 2000  
32  
33 data, the proportion population Black, the proportion population Hispanic, and the proportion of  
34  
35 families with income below the poverty level for each adolescent's census tract were calculated.  
36  
37  
38  
39  
40

#### 41 **Statistical analysis**

42  
43 Pearson correlation coefficients were used to describe the association among community  
44  
45 influences. Multiple logistic regression was used to assess the association between individual and  
46  
47 environmental risk factors and ever tried smoking, and multiple ordered logistic regression was  
48  
49 used to assess the odds of being higher on the frequency of smoking scale among smokers.  
50  
51 Because the majority of the sample resided in unique census tracts, it was not necessary to fit  
52  
53 hierarchical models. Instead, the environmental variables were entered as individual-level risk  
54  
55  
56  
57  
58  
59  
60



1  
2  
3 indicators of the adolescent's environment. Some variables (movie smoking exposure, sensation  
4 seeking, team sports participation, tobacco outlet density, distance to the closest outlet,  
5  
6 proportion population Black, proportion population Hispanic, and proportion families with  
7  
8 incomes below the poverty level) were skewed right. In order to limit the influence of high  
9  
10 outliers, values higher than the 95<sup>th</sup> percentile were trimmed to the 95<sup>th</sup> percentile. Additionally,  
11  
12 to allow a comparison of effect size among the variables, friend smoking, movie smoking  
13  
14 exposure, tobacco outlet density, proportion of families with incomes below the poverty level,  
15  
16 sensation seeking, and team sports participation were rescaled so that the lowest value was 0 and  
17  
18 the highest value was 1. This scaling procedure allowed a comparison between the dose-response  
19  
20 between individual/community measures and adolescent smoking. Ninety-five percent  
21  
22 confidence intervals were assessed based on two-tailed hypothesis assumptions.  
23  
24  
25  
26  
27  
28  
29  
30  
31

## 32 RESULTS

33  
34  
35  
36 *Individual and community characteristics:* Table 1 describes the characteristics of the  
37  
38 adolescents and their correlation with the two smoking outcomes. Thirty-six percent had tried  
39  
40 smoking, and this percentage increased across age categories from 18 to 56 percent in 13 and 18  
41  
42 year olds respectively. Among smokers, mean smoking intensity also increased with age. There  
43  
44 were no large differences in tried smoking prevalence across gender or race, but smoking  
45  
46 intensity was much lower among Black and Hispanic smokers compared with Whites and those  
47  
48 of mixed race. The correlation between community variables and smoking was an order of  
49  
50 magnitude lower than correlations with individual characteristics. Whereas tobacco outlet  
51  
52 density was positively correlated with trying smoking, it was negatively correlated with smoking  
53  
54  
55  
56  
57  
58  
59  
60

1  
2  
3  
4  
5  
6  
7  
8  
9  
10  
11  
12  
13  
14  
15  
16  
17  
18  
19  
20  
21  
22  
23  
24  
25  
26  
27  
28  
29  
30  
31  
32  
33  
34  
35  
36  
37  
38  
39  
40  
41  
42  
43  
44  
45  
46  
47  
48  
49  
50  
51  
52  
53  
54  
55  
56  
57  
58  
59  
60

intensity. The largest correlation for community predictors was -0.19, between proportion population Black and smoking intensity, also consistent with lower smoking intensity among minorities at the individual level.

For peer review only

Table 1. Individual and community risk factors and smoking outcomes (N=3646).

| Variable                          | n     | Proportion of Sample | Proportion Who Have Tried Smoking | Smoking Intensity |
|-----------------------------------|-------|----------------------|-----------------------------------|-------------------|
|                                   |       |                      |                                   | Scale Mean        |
| Individual descriptors            |       |                      |                                   |                   |
| Categorical                       |       |                      |                                   |                   |
| Age                               |       |                      |                                   |                   |
| 13                                | 114   | 0.03                 | 0.18                              | 1.81              |
| 14                                | 722   | 0.20                 | 0.24                              | 1.73              |
| 15                                | 827   | 0.23                 | 0.29                              | 2.04              |
| 16                                | 804   | 0.22                 | 0.37                              | 2.21              |
| 17                                | 769   | 0.21                 | 0.43                              | 2.57              |
| 18                                | 410   | 0.11                 | 0.56                              | 3.10              |
| Gender                            |       |                      |                                   |                   |
| Male                              | 1,810 | 0.50                 | 0.38                              | 2.39              |
| Female                            | 1,836 | 0.50                 | 0.34                              | 2.32              |
| Race/ethnicity                    |       |                      |                                   |                   |
| White                             | 2,091 | 0.57                 | 0.36                              | 2.74              |
| Black                             | 818   | 0.22                 | 0.32                              | 1.61              |
| Hispanic                          | 481   | 0.13                 | 0.41                              | 1.89              |
| Mixed race/other                  | 256   | 0.07                 | 0.38                              | 2.37              |
| Sibling smokes                    |       |                      |                                   |                   |
| No                                | 2,924 | 0.80                 | 0.31                              | 2.29              |
| Yes                               | 720   | 0.20                 | 0.56                              | 2.51              |
| Friend smoking                    |       |                      |                                   |                   |
| None                              | 1,615 | 0.44                 | 0.17                              | 1.27              |
| Some                              | 1,711 | 0.47                 | 0.45                              | 2.15              |
| Most                              | 316   | 0.09                 | 0.78                              | 4.23              |
| Ever smoked                       |       |                      |                                   |                   |
| No                                | 2,349 | 0.64                 |                                   |                   |
| Yes                               | 1,297 | 0.36                 |                                   |                   |
| Continuous                        |       |                      |                                   |                   |
| Smoking Intensity (among smokers) | 1     | 1,3                  |                                   |                   |
| Socioeconomic status              | 0.08  | -0.65,0.65           | -0.12                             | 0.01              |
| Movie smoking exposure            | 558   | 285,883              | 0.21                              | 0.05              |
| Team sports participation         | 1     | 0,2                  | -0.08                             | -0.16             |
| Sensation seeking                 | 12    | 10,14                | 0.31                              | 0.27              |

## Community descriptors

|                                             |      |           |       |       |
|---------------------------------------------|------|-----------|-------|-------|
| Tobacco outlet density (per 1000 people)    | 0.34 | 0.03,1.12 | 0.03  | -0.07 |
| Distance (mi) to nearest outlet             | 0.59 | 0.29,1.19 | 0.001 | 0.03  |
| Proportion population Black <sup>a</sup>    | 0.03 | 0.01,0.21 | -0.03 | -0.19 |
| Proportion population Hispanic <sup>a</sup> | 0.03 | 0.01,0.09 | 0.02  | -0.10 |
| Poverty <sup>a,b</sup>                      | 0.06 | 0.03,0.11 | 0.02  | -0.12 |

---

<sup>a</sup>For each adolescent's census tract.

<sup>b</sup>Proportion of families with income below the poverty level.

The community characteristics were also correlated with each other. Higher tobacco outlet density was associated with larger proportions of families with incomes below the poverty level, proportion of the population that was Black and Hispanic (Table 2). Tobacco outlet density decreased as distance to nearest outlet increased (correlation = -0.32), but the relationship was not linear. There was a wide range for distance to closest outlet among adolescents living in low tobacco outlet density areas, and a wide range of densities among adolescents living close to an outlet, justifying the consideration of both factors as being independently associated with smoking behavior.

Table 2. Correlation among the environmental descriptors.

| Environmental descriptor                      | Correlation |       |       |      |      |
|-----------------------------------------------|-------------|-------|-------|------|------|
|                                               | 1           | 2     | 3     | 4    | 5    |
| 1 Tobacco outlet density (per 1000 people)    | 1.00        |       |       |      |      |
| 2 Distance (mi) to nearest outlet             | -0.32       | 1.00  |       |      |      |
| 3 Proportion population Black <sup>a</sup>    | 0.27        | -0.17 | 1.00  |      |      |
| 4 Proportion population Hispanic <sup>a</sup> | 0.26        | -0.13 | -0.10 | 1.00 |      |
| 5 Poverty <sup>a,b</sup>                      | 0.39        | -0.12 | 0.52  | 0.38 | 1.00 |

<sup>a</sup>For each adolescent's census tract.

<sup>b</sup>Proportion of families with income below the poverty level.

*Relation with ever tried smoking:* Overall, 35.6 percent of respondents reported ever having tried a cigarette. Being male, being Hispanic, having sibling(s) who smoke, being of lower socioeconomic status, having friends who smoke, being older, having more exposure to movie smoking, not playing team sports, being higher in sensation seeking, and living in a neighborhood with higher tobacco outlet density were all significantly associated with ever trying smoking in the unadjusted models (Table 3). Two types of multivariate models were built to test these associations with ever trying smoking. In the first, only community-level factors

1  
2  
3 were included; it showed a significant inverse association with proportion of the population that  
4  
5 was Black and a significant association with census tract poverty. In the second multivariate  
6  
7 model, individual characteristics were added, which substantially improved model fit. Whereas  
8  
9 most individual characteristics (sibling smoking, socioeconomic status, friend smoking, age,  
10  
11 movie smoking exposure, team sports participation, and sensation seeking) were significantly  
12  
13 associated with ever trying smoking in the second model, none of the community characteristics  
14  
15 were significantly associated with ever trying smoking. Notably, the coefficient for tobacco  
16  
17 outlet density changed little across models and, although small, remained close to statistical  
18  
19 significance, in contrast to the other community predictors.  
20  
21  
22  
23  
24  
25  
26  
27  
28  
29  
30  
31  
32  
33  
34  
35  
36  
37  
38  
39  
40  
41  
42  
43  
44  
45  
46  
47  
48  
49  
50  
51  
52  
53  
54  
55  
56  
57  
58  
59  
60

Table 3. Crude and multivariate association with ever tried smoking.

| Variable                                                       | Crude Odds Ratio | Community only <sup>a</sup><br>n = 3,621 |            | All variables <sup>b</sup><br>n = 3,543 |            |
|----------------------------------------------------------------|------------------|------------------------------------------|------------|-----------------------------------------|------------|
|                                                                |                  | Adj Odds Ratio                           | 95% CI     | Adj Odds Ratio                          | 95% CI     |
| Individual characteristics                                     |                  |                                          |            |                                         |            |
| Categorical                                                    |                  |                                          |            |                                         |            |
| Gender                                                         |                  |                                          |            |                                         |            |
| Male                                                           | Ref              |                                          |            |                                         |            |
| Female                                                         | 0.84*            |                                          |            | 1.03                                    | 0.88,1.21  |
| Race/ethnicity                                                 |                  |                                          |            |                                         |            |
| White                                                          | Ref              |                                          |            |                                         |            |
| Black                                                          | 0.85             |                                          |            | 0.85                                    | 0.62,1.18  |
| Hispanic                                                       | 1.24*            |                                          |            | 1.18                                    | 0.88,1.59  |
| Mixed race/other                                               | 1.13             |                                          |            | 1.08                                    | 0.77,1.50  |
| Sibling smokes                                                 |                  |                                          |            |                                         |            |
| No                                                             | Ref              |                                          |            |                                         |            |
| Yes                                                            | 2.85*            |                                          |            | 2.13*                                   | 1.75,2.59  |
| Friend smoking                                                 |                  |                                          |            |                                         |            |
| None                                                           | Ref              |                                          |            |                                         |            |
| Some                                                           | 3.93*            |                                          |            | 2.60*                                   | 2.19,3.10  |
| Most                                                           | 17.14*           |                                          |            | 7.01*                                   | 5.05,9.74  |
| Continuous                                                     |                  |                                          |            |                                         |            |
| Age (for each additional year)                                 | 1.39*            |                                          |            | 1.23*                                   | 1.16,1.31  |
| Socioeconomic status                                           | 0.76*            |                                          |            | 0.82*                                   | 0.74,0.91  |
| Movie smoking exposure                                         | 5.14*            |                                          |            | 2.66*                                   | 1.95,3.63  |
| Team sports participation                                      | 0.59*            |                                          |            | 0.69*                                   | 0.54,0.89  |
| Sensation seeking                                              | 20.71*           |                                          |            | 7.72*                                   | 5.26,11.34 |
| Community characteristics                                      |                  |                                          |            |                                         |            |
| Tobacco outlet density (per 1000 people)                       | 1.30*            | 1.28                                     | 0.97,1.70  | 1.27                                    | 0.92,1.76  |
| Tobacco outlet proximity (distance in miles to nearest outlet) | 0.86             | 0.94                                     | 0.69,1.27  | 0.96                                    | 0.67,1.36  |
| Proportion population Black <sup>c</sup>                       | 0.80             | 0.59*                                    | 0.42,0.83  | 0.93                                    | 0.53,1.61  |
| Proportion population Hispanic <sup>c</sup>                    | 1.47             | 0.87                                     | 0.49,1.55  | 0.88                                    | 0.41,1.87  |
| Poverty <sup>c,d</sup>                                         | 2.06             | 3.66*                                    | 1.07,12.42 | 0.74                                    | 0.17,3.22  |

\*p&lt;0.05

<sup>a</sup>Pseudo R<sup>2</sup> = 0.003<sup>b</sup>Pseudo R<sup>2</sup> = 0.20<sup>c</sup>For each adolescent's census tract<sup>d</sup>Proportion of families with income below the poverty level

1  
2  
3  
4  
5  
6  
7  
8 *Relation with smoking intensity:* Most of the respondents who had tried smoking (73%) reported  
9  
10 no smoking in the past 30 days. Multivariate model results for smoking intensity among the  
11  
12 experimental smokers are reported in Table 4. Minority status, friend smoking, age, team sports  
13  
14 participation, sensation seeking, tobacco outlet density, proportion population Black and  
15  
16 Hispanic, and poverty, were all associated with smoking intensity at the bivariate level. In the  
17  
18 community-only multivariate model, proportion population Black and Hispanic retained a  
19  
20 significant inverse relation with smoking intensity. In the full model, friend smoking, age, and  
21  
22 sensation seeking were all associated with higher intensity and being Black or Hispanic and  
23  
24 participating in team sports associated with lower intensity. None of the community  
25  
26 characteristics retained a statistically significant association with smoking intensity.  
27  
28  
29  
30  
31  
32

33  
34 The tobacco outlet density—smoking association was not significantly different for those 18  
35  
36 years and older in either the tried smoking or the smoking intensity model. Additionally,  
37  
38 excluding subjects for whom Zip Code centroid was used as a proxy for home address had little  
39  
40 impact on the results.  
41  
42  
43  
44  
45  
46  
47  
48  
49  
50  
51  
52  
53  
54  
55  
56  
57  
58  
59  
60



Table 4. Crude and multivariate association with smoking intensity among experimental smokers.

| Variable                                                       | Crude Odds Ratio | Community only <sup>a</sup><br>n = 1,289 |           | All variables <sup>b</sup><br>n = 1,263 |             |
|----------------------------------------------------------------|------------------|------------------------------------------|-----------|-----------------------------------------|-------------|
|                                                                |                  | Adj Odds Ratio                           | 95% CI    | Adj Odds Ratio                          | 95% CI      |
| Individual characteristics                                     |                  |                                          |           |                                         |             |
| Categorical                                                    |                  |                                          |           |                                         |             |
| Gender                                                         |                  |                                          |           |                                         |             |
| Male                                                           | Ref              |                                          |           |                                         |             |
| Female                                                         | 0.93             |                                          |           | 1.05                                    | 0.84,1.33   |
| Race/ethnicity                                                 |                  |                                          |           |                                         |             |
| White                                                          | Ref              |                                          |           |                                         |             |
| Black                                                          | 0.25*            |                                          |           | 0.48*                                   | 0.30,0.79   |
| Hispanic                                                       | 0.40*            |                                          |           | 0.46*                                   | 0.31,0.69   |
| Mixed race/other                                               | 0.60*            |                                          |           | 0.53*                                   | 0.34,0.85   |
| Sibling smokes                                                 |                  |                                          |           |                                         |             |
| No                                                             | Ref              |                                          |           |                                         |             |
| Yes                                                            | 1.21             |                                          |           | 0.98                                    | 0.76,1.26   |
| Friend smoking                                                 |                  |                                          |           |                                         |             |
| None                                                           | Ref              |                                          |           |                                         |             |
| Some                                                           | 4.73*            |                                          |           | 3.37*                                   | 2.37,4.81   |
| Most                                                           | 33.62*           |                                          |           | 20.27*                                  | 13.22,31.08 |
| Continuous                                                     |                  |                                          |           |                                         |             |
| Age (for each additional year)                                 | 1.37*            |                                          |           | 1.32*                                   | 1.21,1.44   |
| Socioeconomic status                                           | 1.10             |                                          |           | 1.09                                    | 0.94,1.26   |
| Movie smoking exposure                                         | 1.29             |                                          |           | 1.04                                    | 0.68,1.59   |
| Team sports participation                                      | 0.36*            |                                          |           | 0.38*                                   | 0.26,0.55   |
| Sensation seeking                                              | 12.95*           |                                          |           | 6.57*                                   | 3.71,11.64  |
| Community characteristics                                      |                  |                                          |           |                                         |             |
| Tobacco outlet density (per 1000 people)                       | 0.62*            | 0.98                                     | 0.64,1.50 | 1.11                                    | 0.70,1.79   |
| Tobacco outlet proximity (distance in miles to nearest outlet) | 1.32             | 0.76                                     | 0.48,1.20 | 0.74                                    | 0.45,1.20   |
| Proportion population Black <sup>c</sup>                       | 0.15*            | 0.12*                                    | 0.07,0.22 | 0.42                                    | 0.18,1.00   |
| Proportion population Hispanic <sup>c</sup>                    | 0.20*            | 0.13*                                    | 0.06,0.32 | 0.43                                    | 0.14,1.33   |
| Poverty <sup>c,d</sup>                                         | 0.02*            | 1.54                                     | 0.24,9.96 | 1.14                                    | 0.13,10.03  |

\*p&lt;0.05

<sup>a</sup>Pseudo R<sup>2</sup> = 0.02<sup>b</sup>Pseudo R<sup>2</sup> = 0.15

1  
2  
3  
4  
5 <sup>c</sup>For each adolescent's census tract.  
6

---

7 <sup>d</sup>Proportion of families with income below the poverty level  
8

---

## 9 10 11 12 **DISCUSSION**

13  
14 This study highlights the much stronger association between individual health risk factors and  
15 youth smoking behavior compared to community risk factors. Two studies that have examined  
16 the relationship between tobacco outlet density or proximity and youth smoking have suggested  
17 that tobacco outlet density (but not proximity) is associated with youth smoking.(21, 22)  
18

19 Consistent with those studies, in the unadjusted model we saw a statistically significant  
20 association between tobacco outlet density and youth smoking, but not after accounting for  
21 additional community and individual risk factors for youth smoking. More importantly, the  
22 magnitudes of the community associations with youth smoking were small compared to  
23 individual risk factors. Thus, regardless of whether the association of tobacco outlet density  
24 reached accepted standards for statistical significance, the small potential effect across a broad  
25 range of tobacco outlet densities suggests that policies designed to lower density would have  
26 only a small impact on adolescent smoking. In contrast, the associations between team sports  
27 participation and both smoking outcomes were large enough to suggest that interventions and  
28 policies aiming to support those activities could help prevent adolescent smoking.  
29  
30  
31  
32  
33  
34  
35  
36  
37  
38  
39  
40  
41  
42  
43  
44  
45  
46  
47  
48  
49

50 This study used Bronfenbrenner's Ecological Systems Theory to frame the possible joint effects  
51 of individual-level, microsystem, mesosystem, and exosystem variables on youth smoking.  
52

53 When variables were scaled so as to compare effect sizes, our findings indicated a relative  
54 importance of individual-level variables compared to the community variables we studied. We  
55  
56  
57  
58  
59  
60

1  
2  
3 suggest empirical multi-level studies pay attention to estimating effects that allow for such  
4  
5 comparisons, in addition to focusing on statistical significance. Although we found no strong  
6  
7 associations with smoking for the community variables studied, this study does not rule out the  
8  
9 possibility that other neighborhood characteristics, such as measures of social capital or  
10  
11 neighborhood smoking, may have an important impact on youth smoking. In fact, one study  
12  
13 using the Brofenbrenner model found that neighborhood rates of youth smoking affected  
14  
15 adolescent smoking trajectories, over and above individual risk factors.(41)  
16  
17  
18  
19  
20  
21

22 The association between some risk factors and smoking was present for trying smoking but not  
23  
24 smoking intensity among experimental smokers, underlying the importance of modeling  
25  
26 different smoking transitions separately. Trying smoking is strongly influenced by social risk  
27  
28 factors (sibling smoking, friend smoking, movie smoking, and team sports participation). Among  
29  
30 experimental smokers, smoking intensity continues to be associated with smoking by some  
31  
32 social influence factors—peers, team sports, and exposure to tobacco marketing,(35, 42) but is  
33  
34 also is predominantly driven by addiction processes.(43, 44) In this study, sensation seeking was  
35  
36 a risk factor for both trying smoking and higher smoking intensity, consistent with other  
37  
38 research.(45) Sensation seeking level probably captures, in part, biological characteristics that  
39  
40 promote experience seeking(46) and tolerance of deviance,(47) but it may also be associated  
41  
42 with higher sensitivity to the addictive influence of nicotine.(48) Given its large association with  
43  
44 both smoking outcomes in this study, research on using sensation seeking to target high risk  
45  
46 adolescents,(49) modifying risk factors that affect sensation seeking deserve greater emphasis.  
47  
48 For example, one study suggested that higher exposure to adult-rated movies resulted in higher  
49  
50 growth in sensation seeking during adolescence.(50)  
51  
52  
53  
54  
55  
56  
57  
58  
59  
60

1  
2  
3  
4  
5  
6 Consistent with other studies that have distinguished between trying smoking and smoking  
7  
8 intensity,(51) some characteristics were associated with one outcome but not the other. Exposure  
9  
10 to smoking in movies was associated with trying smoking but not smoking intensity, consistent  
11  
12 with some other reports.(35, 42) Minority youth tried smoking at rates similar to White youth,  
13  
14 but minority ever smokers had much lower smoking intensity than Whites. This finding is not  
15  
16 surprising, given that minority adolescents have lower rates of smoking compared with  
17  
18 Whites,(52, 53) with larger temporal declines in smoking among Black adolescents(54) and  
19  
20 lower rates of progression to regular use.(55) Studies of trying smoking have been inconsistent,  
21  
22 with some confirming lower rates among minorities,(56)whereas others,(57) including this one,  
23  
24 did not. Why minority youth that try smoking have lower smoking intensity than Whites  
25  
26 deserves further research, given that the finding holds across studies;(52, 55) minority  
27  
28 adolescents could be less susceptible to nicotine addiction in its earliest stages or social or family  
29  
30 circumstances could reduce the likelihood of progression of experimental smoking during  
31  
32 adolescence.  
33  
34  
35  
36  
37  
38  
39  
40

41 This study was limited in that it relied on cross-sectional data and therefore cannot address  
42  
43 temporality. However, it would be unusual to see a weak correlation in a cross-sectional study  
44  
45 become a key predictor in a longitudinal one. The national scope of the study could be viewed as  
46  
47 a strength but precluded us from directly assessing where tobacco outlets were in each  
48  
49 community. Instead, we relied on available commercial data, subject to higher levels of error.  
50  
51 Although this limitation could have widened confidence intervals due to random error, we have  
52  
53 no reason to believe that the error is larger in some neighborhoods than others, which would lead  
54  
55  
56  
57  
58  
59  
60

1  
2  
3 to biased estimates. We suggest that, even if the results were statistically significant, the size of  
4  
5 the associations were still small for tobacco outlet density and the other community  
6  
7 characteristics we measured.  
8  
9

10  
11  
12 Compared to individual risk factors, tobacco outlet density might be less relevant for minors who  
13  
14 are legally constrained in their purchase of tobacco. One previous study of adolescent smoking  
15  
16 found no association for tobacco outlet density but a positive association between access—the  
17  
18 proportion of stores that illegally sell to minors—and youth smoking.(25) This suggests that  
19  
20 tobacco outlet density could be more important in determining smoking patterns among adults,  
21  
22 who are less constrained in their purchase of tobacco at retail outlets. Although we found no  
23  
24 evidence for that in the small number of adults present in this sample, further study in adult  
25  
26 samples may be indicated. Our study did not explicitly measure exposure to tobacco storefront  
27  
28 advertising in the context of community-level influences and therefore cannot address this issue  
29  
30 explicitly—we cannot rule out a storefront advertising influence without more elaborate  
31  
32 measurements of access to this particular aspect of tobacco retailing. Tobacco outlet density  
33  
34 should be a proxy for exposure to storefront advertising but would not capture individual  
35  
36 differences in how adolescents respond to or remember it, which could explain differences  
37  
38 between our findings and those of others who assessed recollection of storefront advertising.(58)  
39  
40 Finally, we studied tobacco density and proximity at the home, not the school. McCarthy et al.  
41  
42 looked at the relationship between tobacco retail density near schools and youth tobacco use and  
43  
44 found that the effects were limited to trying smoking (not established smoking), and only among  
45  
46 high school students in urban areas.(59) However, their work did not include the depth of  
47  
48 individual-level variables presented in this analysis. Future studies should consider the role of  
49  
50  
51  
52  
53  
54  
55  
56  
57  
58  
59  
60

1  
2  
3 school density and proximity to tobacco outlets around schools in context of individual risk  
4  
5 factors.  
6  
7  
8  
9

10 This study adds to the growing body of evidence that public health campaigns to prevent and  
11 reduce youth smoking should emphasize individual risk factors for smoking, including  
12 supporting participation in team sports, minimizing exposure to movie smoking, addressing the  
13 social influence of friend smoking, and addressing experience seeking among high sensation-  
14  
15 seekers.  
16  
17  
18  
19  
20  
21  
22  
23

24 **Acknowledgements** None.  
25  
26

27 **Funding** This work was supported by the National Institutes of Health CA77026 (James D.  
28 Sargent) and 1K23AG036934 (Ethan Berke).  
29  
30  
31

32 **Competing interests** None.  
33  
34  
35  
36  
37  
38  
39  
40  
41  
42  
43  
44  
45  
46  
47  
48  
49  
50  
51  
52  
53  
54  
55  
56  
57  
58  
59  
60

## REFERENCES

1. Sargent JD, Tanski S, Stoolmiller M, et al. Using sensation seeking to target adolescents for substance use interventions. *Addiction*. 2010;105(3):506-14. Epub 2010/04/21.
2. Stephenson MT, Helme DW. Authoritative parenting and sensation seeking as predictors of adolescent cigarette and marijuana use. *J Drug Education*. 2006;36(3):247-70.
3. Bauman KE, Foshee VA, Linzer MA, et al. Effect of parental smoking classification on the association between parental and adolescent smoking. *Addict Behav*. 1990;15(5):413-22.
4. Conrad KM, Flay BR, Hill D. Why children start smoking cigarettes: predictors of onset. *Br J Addict*. 1992;87(12):1711-24.
5. Fleming CB, Kim H, Harachi TW, et al. Family processes for children in early elementary school as predictors of smoking initiation. *The Journal of adolescent health : official publication of the Society for Adolescent Medicine*. 2002;30(3):184-9.
6. Jackson C, Henriksen L. Do as I say: parent smoking, antismoking socialization, and smoking onset among children. *Addict Behav*. 1997;22(1):107-14.
7. Biglan A, Duncan TE, Ary DV, et al. Peer and parental influences on adolescent tobacco use. *J Behav Med*. 1995;18(4):315-30.
8. Flay BR, Hu FB, Siddiqui O, et al. Differential influence of parental smoking and friends' smoking on adolescent initiation and escalation of smoking. *J Health Soc Behav*. 1994;35(3):248-65.
9. DiFranza JR, Wellman RJ, Sargent JD, et al. Tobacco promotion and the initiation of tobacco use: assessing the evidence for causality. *Pediatrics*. 2006;117(6):e1237-48.
10. National Cancer Institute. *The Role of the Media in Promoting and Reducing Tobacco Use*. Tobacco Control Monograph No. 19. Bethesda, MD: U.S. Department of Health and Human Services, National Institutes of Health, National Cancer Institute. NIH Pub. No. 07-6242, 2008 June. Report No.
11. U.S. Department of Health and Human Services. *Preventing Tobacco Use Among Youth and Young Adults: A Report of the Surgeon General*. Atlanta, GA: U.S. Department of Health and Human Services, Centers for Disease Control and Prevention, National Center for Chronic Disease Prevention and Health Promotion, Office on Smoking and Health, 2012.
12. Adachi-Mejia AM, Primack BA, Beach ML, et al. Influence of movie smoking exposure and team sports participation on established smoking. *Arch Pediatr Adolesc Med*. 2009;163(7):638-43. Epub 2009/07/08.
13. Brown KS, Cameron R, Madill C, et al. Outcome evaluation of a high school smoking reduction intervention based on extracurricular activities. *Prev Med*. 2002;35(5):506-10. Epub 2002/11/15.
14. Shilts L. The relationship of early adolescent substance use to extracurricular activities, peer influence, and personal attitudes. *Adolescence*. 1991;26(103):613-7. Epub 1991/01/01.
15. Terry-McElrath YM, O'Malley PM. Substance use and exercise participation among young adults: parallel trajectories in a national cohort-sequential study. *Addiction*. 2011;106(10):1855-65; discussion 66-7. Epub 2011/05/13.
16. Terry-McElrath YM, O'Malley PM, Johnston LD. Exercise and substance use among American youth, 1991-2009. *Am J Prev Med*. 2011;40(5):530-40. Epub 2011/04/19.
17. Perry CL. Results of prevention programs with adolescents. *Drug Alcohol Depend*. 1987;20(1):13-9.



18. Master Settlement Agreement. <http://www.naaq.org/issues/tobacco/index.php?sdpid=919>. 1998 [June 16, 2005]; Available from: <http://www.naaq.org/issues/tobacco/index.php?sdpid=919>.
19. Feighery EC, Henriksen L, Wang Y, et al. An evaluation of four measures of adolescents' exposure to cigarette marketing in stores. *Nicotine Tob Res.* 2006;8(6):751-9. Epub 2006/11/30.
20. Henriksen L, Feighery EC, Schleicher NC, et al. Receptivity to alcohol marketing predicts initiation of alcohol use. *The Journal of adolescent health : official publication of the Society for Adolescent Medicine.* 2008;42(1):28-35.
21. Novak SP, Reardon SF, Raudenbush SW, et al. Retail tobacco outlet density and youth cigarette smoking: a propensity-modeling approach. *Am J Public Health.* 2006;96(4):670-6. Epub 2006/03/02.
22. Henriksen L, Feighery EC, Schleicher NC, et al. Is adolescent smoking related to the density and proximity of tobacco outlets and retail cigarette advertising near schools? *Prev Med.* 2008;47(2):210-4. Epub 2008/06/12.
23. Ogneva-Himmelberger Y, Ross L, Burdick W, et al. Using geographic information systems to compare the density of stores selling tobacco and alcohol: youth making an argument for increased regulation of the tobacco permitting process in Worcester, Massachusetts, USA. *Tob Control.* 2010;19(6):475-80. Epub 2010/09/08.
24. West JH, Blumberg EJ, Kelley NJ, et al. Does proximity to retailers influence alcohol and tobacco use among Latino adolescents? *J Immigr Minor Health.* 2010;12(5):626-33. Epub 2009/11/26.
25. Pokorny SB, Jason LA, Schoeny ME. The relation of retail tobacco availability to initiation and continued smoking. *J Clin Child Adolesc Psychol.* 2003;32(2):193-204.
26. Peterson NA, Lowe JB, Reid RJ. Tobacco outlet density, cigarette smoking prevalence, and demographics at the county level of analysis. *Subst Use Misuse.* 2005;40(11):1627-35. Epub 2005/10/29.
27. Schneider JE, Reid RJ, Peterson NA, et al. Tobacco outlet density and demographics at the tract level of analysis in Iowa: implications for environmentally based prevention initiatives. *Prev Sci.* 2005;6(4):319-25. Epub 2005/09/16.
28. Yu D, Peterson NA, Sheffer MA, et al. Tobacco outlet density and demographics: analysing the relationships with a spatial regression approach. *Public Health.* 2010;124(7):412-6. Epub 2010/06/15.
29. Hyland A, Travers MJ, Cummings KM, et al. Tobacco outlet density and demographics in Erie County, New York. *Am J Public Health.* 2003;93(7):1075-6. Epub 2003/07/02.
30. Cohen JE, Anglin L. Outlet density: a new frontier for tobacco control. *Addiction.* 2009;104(1):2-3. Epub 2009/01/13.
31. Bronfenbrenner U. Toward an experimental ecology of human development. *American Psychologist.* 1977;32(7):513-31.
32. Bronfenbrenner U. The ecology of developmental processes. In: W. Damon, RM Lerner, editors. *Handbook of Child Psychology.* 5 ed. New York: John Wiley & Sons, Inc.; 1998. p. 993-1028.
33. Bronfenbrenner U. Developmental Research, Public Policy, and the Ecology of Childhood. *Child Dev.* 1974;45(1):1-5.
34. Sargent J, Beach M, Adachi-Mejia A, et al. Exposure to movie smoking: Its relation to smoking initiation among U.S. adolescents. *Pediatrics.* 2005;116(5):1183-91.
35. Sargent JD, Hanewinkel R. Comparing the effects of entertainment media and tobacco marketing on youth smoking in Germany. *Addiction.* 2009;104:815-23.
36. Sargent JD, Worth KA, Beach M, et al. Population-Based Assessment of Exposure to Risk Behaviors in Motion Pictures. *Commun Methods Meas.* 2008;2(1-2):134-51. Epub 2009/01/06.



- 1
  - 2
  - 3
  - 4
  - 5
  - 6
  - 7
  - 8
  - 9
  - 10
  - 11
  - 12
  - 13
  - 14
  - 15
  - 16
  - 17
  - 18
  - 19
  - 20
  - 21
  - 22
  - 23
  - 24
  - 25
  - 26
  - 27
  - 28
  - 29
  - 30
  - 31
  - 32
  - 33
  - 34
  - 35
  - 36
  - 37
  - 38
  - 39
  - 40
  - 41
  - 42
  - 43
  - 44
  - 45
  - 46
  - 47
  - 48
  - 49
  - 50
  - 51
  - 52
  - 53
  - 54
  - 55
  - 56
  - 57
  - 58
  - 59
  - 60
37. Carlos HA, Shi X, Sargent J, et al. Density estimation and adaptive bandwidths: a primer for public health practitioners. *Int J Health Geogr.* 2010;9:39. Epub 2010/07/27.
38. Shi X. Selection of bandwidth type and adjustment side in kernel density estimation over inhomogeneous backgrounds. *International Journal of Geographic Information Science.* 2010;24(5):643-60.
39. Oak Ridge National Laboratory. LandScan Global Population Database. Oak Ridge, TN [4/2/11]; Available from: <http://www.ornl.gov/landscan/>.
40. Esri. Esri StreetMap Premium - Advanced Geocoding, Routing, and Cartography. Redlands, CA [4/2/11]; Available from: <http://www.esri.com/data/streetmap/index.html>.
41. Ennett ST, Foshee VA, Bauman KE, et al. A social contextual analysis of youth cigarette smoking development. *Nicotine Tob Res.* 2010;12(9):950-62. Epub 2010/08/07.
42. Sargent JD, Gibson J, Heatherton TF. Comparing the effects of entertainment media and tobacco marketing on youth smoking. *Tob Control.* 2009;18(1):47-53.
43. DiFranza JR, Rigotti NA, McNeill AD, et al. Initial symptoms of nicotine dependence in adolescents. *Tob Control.* 2000;9(3):313-9.
44. DiFranza JR, Savageau JA, Fletcher K, et al. Measuring the loss of autonomy over nicotine use in adolescents: the DANDY (Development and Assessment of Nicotine Dependence in Youths) study. *Arch Pediatr Adolesc Med.* 2002;156(4):397-403.
45. Skara S, Sussman S, Dent CW. Predicting regular cigarette use among continuation high school students. *Am J Health Behav.* 2001;25(2):147-56. Epub 2001/04/12.
46. Zuckerman M. Behavioral expressions and biosocial bases of sensation seeking. New York: Cambridge University Press; 1994.
47. Newcomb MD, McGee L. Influence of sensation seeking on general deviance and specific problem behaviors from adolescence to young adulthood. *J Pers Soc Psychol.* 1991;61(4):614-28. Epub 1991/10/01.
48. Perkins KA, Gerlach D, Broge M, et al. Greater sensitivity to subjective effects of nicotine in nonsmokers high in sensation seeking. *Exp Clin Psychopharmacol.* 2000;8(4):462-71. Epub 2000/12/29.
49. Conrod PJ, Castellanos N, Mackie C. Personality-targeted interventions delay the growth of adolescent drinking and binge drinking. *J Child Psychol Psychiatry.* 2008;49(2):181-90. Epub 2008/01/24.
50. Stoolmiller M, Gerrard M, Sargent JD, et al. R-rated movie viewing, growth in sensation seeking and alcohol initiation: reciprocal and moderation effects. *Prev Sci.* 2010;11(1):1-13. Epub 2009/08/06.
51. Robinson LA, Murray DM, Alfano CM, et al. Ethnic differences in predictors of adolescent smoking onset and escalation: A longitudinal study from 7th to 12th grade. *Nicotine & Tobacco Research.* 2006;8(2):297-307.
52. Bachman JG, Wallace JM, Jr., O'Malley PM, et al. Racial/Ethnic differences in smoking, drinking, and illicit drug use among American high school seniors, 1976-89. *Am J Public Health.* 1991;81(3):372-7.
53. Lewis PC, Harrell JS, Bradley C, et al. Cigarette use in adolescents: the Cardiovascular Health in Children and Youth Study. *ResNursHealth.* 2001;24(1):27-37.
54. Nelson MC, Gordon-Larsen P. Physical activity and sedentary behavior patterns are associated with selected adolescent health risk behaviors. *Pediatrics.* 2006;117(4):1281-90.
55. Flint AJ, Yamada EG, Novotny TE. Black-white differences in cigarette smoking uptake: progression from adolescent experimentation to regular use. *Prev Med.* 1998;27(3):358-64.
56. Headen SW, Bauman KE, Deane GD, et al. Are the correlates of cigarette smoking initiation different for black and white adolescents? *Am J Public Health.* 1991;81(7):854-8.
57. Jackson C, Brown JD, L'Engle KL. R-rated movies, bedroom televisions, and initiation of smoking by white and black adolescents. *Arch Pediatr Adolesc Med.* 2007;161(3):260-8.

- 58. Henriksen L, Feighery EC, Wang Y, et al. Association of retail tobacco marketing with adolescent smoking. Am J Public Health. 2004;94(12):2081-3.
- 59. McCarthy WJ, Mistry R, Lu Y, et al. Density of tobacco retailers near schools: effects on tobacco use among students. Am J Public Health. 2009;99(11):2006-13. Epub 2009/10/13.

For peer review only

1  
2  
3  
4  
5  
6  
7  
8  
9  
10  
11  
12  
13  
14  
15  
16  
17  
18  
19  
20  
21  
22  
23  
24  
25  
26  
27  
28  
29  
30  
31  
32  
33  
34  
35  
36  
37  
38  
39  
40  
41  
42  
43  
44  
45  
46  
47  
48  
49  
50  
51  
52  
53  
54  
55  
56  
57  
58  
59  
60

1  
2  
3  
4  
5  
6  
7  
8  
9  
10  
11  
12  
13  
14  
15  
16  
17  
18  
19  
20  
21  
22  
23  
24  
25  
26  
27  
28  
29  
30  
31  
32  
33  
34  
35  
36  
37  
38  
39  
40  
41  
42  
43  
44  
45  
46  
47  
48  
49  
50  
51  
52  
53  
54  
55  
56  
57  
58  
59  
60

## A comparison of individual versus community influences on youth smoking behaviors: A cross-sectional observational study

Anna M. Adachi-Mejia, Ph.D.<sup>a,b,c,d</sup>

Heather A. Carlos<sup>b</sup>

Ethan M. Berke, M.D., M.P.H.<sup>c,d,e</sup>

Susanne E. Tanski, M.D.<sup>a,b,c</sup>

James D. Sargent, M.D.<sup>a,b,c</sup>

<sup>a</sup>Pediatrics, ~~Dartmouth Medical School~~The Geisel School of Medicine at Dartmouth, Lebanon, NH, USA

<sup>b</sup>Dartmouth-Hitchcock Norris Cotton Cancer Center, Lebanon, NH, USA

<sup>c</sup>Cancer Control Research Program, Norris Cotton Cancer Center, Lebanon, NH, USA

<sup>d</sup>The Dartmouth Institute of Health Policy and Clinical Practice, Lebanon, NH, USA

<sup>e</sup>Community & Family Medicine, ~~Dartmouth Medical School~~The Geisel School of Medicine at Dartmouth, Hanover, NH, USA

Correspondence concerning this article should be addressed to: Anna M. Adachi-Mejia, Ph.D., HB 7925, Cancer Control Research Program, Dartmouth-Hitchcock Norris Cotton Cancer Center, Lebanon, NH 03756, USA; Tel (603) 653-6124, Fax (603) 653-9090, E-mail: [anna.adachi-mejia@dartmouth.edu](mailto:anna.adachi-mejia@dartmouth.edu)

Contributorship statement: All authors 1) made substantial contributions to conception and design, acquisition of data, or analysis and interpretation of data; 2) drafted the article or revised it critically for important intellectual content; 3) approved of the final version to be published.

Words: 39643945

Tables: 4

Figures: 0

Key words: Smoking, youth, tobacco outlet density, policy, GIS

**ABSTRACT**

**Objectives** To compare individual with community risk factors for adolescent smoking.

**Design** A cross-sectional observational study with multivariate analysis.

**Setting** National telephone survey.

**Participants** 3646 US adolescents aged 13-18 years in 2007 recruited through a random digital survey.

**Outcome measures** Ever tried smoking and, among experimental smokers, smoking intensity (based on smoking in past 30 days).

**Results** One-third of participants (35.6%, N=1297) had tried smoking. After controlling for individual risk factors, neither tobacco outlet density nor proximity were associated with tried smoking or smoking intensity. Associations with trying smoking included age (Adjusted Odds Ratio [AOR] = 1.23, 95% CI 1.16, 1.31), lower socioeconomic status (AOR = 0.82, 95% CI 0.74, 0.91), sibling smoking (AOR=2.13, 95% CI 1.75, 2.59), friend smoking (AOR = 2.60, 95% CI 2.19, 3.10 for some and AOR = 7.01, 95% CI 5.05,9.74 for most), movie smoking exposure (AOR = 2.66, 95% CI 1.95, 3.63), team sports participation (AOR = 0.69, 95% CI 0.54, 0.89) and sensation seeking (AOR = 7.72, 95% CI 5.26, 11.34). Among experimental smokers, age (AOR = 1.323, 95% CI 1.210, 1.448), minority status (AOR = 0.482, 95% CI 0.3022, 0.7981 for Black; AOR = 0.4650, 95% CI 0.310, 0.6983 for Hispanic; AOR = 0.53, 95% CI 0.43, 0.85 for Mixed race/other), friend smoking (AOR = 36.378, 95% CI 3.292.37,12.394.81 for some; AOR = 32.9820.27, 95% CI 16.4313.22,66.1931.08 for most), team sports participation (AOR = 0.4638, 95% CI 0.3026, 0.7255), and sensation seeking (AOR = 6.8957, 95% CI 3.4271, 13.8811.64) were associated with smoking intensity.

1  
2  
3 **Conclusions** The study suggests that interventions and policies to prevent and reduce youth  
4 smoking should focus on individual risk factors for smoking, including supporting participation  
5 in team sports, minimizing exposure to movie smoking, addressing the social influence of friend  
6 smoking, and addressing experience seeking among high sensation-seekers.  
7  
8  
9  
10  
11  
12  
13  
14  
15  
16  
17  
18  
19  
20  
21  
22  
23  
24  
25  
26  
27  
28  
29  
30  
31  
32  
33  
34  
35  
36  
37  
38  
39  
40  
41  
42  
43  
44  
45  
46  
47  
48  
49  
50  
51  
52  
53  
54  
55  
56  
57  
58  
59  
60

For peer review only

## INTRODUCTION

Preventing adolescent smoking is a key public health imperative. Individual risk factors for youth smoking have been studied for decades. They include personality factors such as sensation seeking,(1, 2) and other social influences like parent(3-6) and friend(7, 8) smoking. They also include exposure to tobacco marketing(9) and smoking in entertainment media(10), which were both considered causal risk factors in a recent (2012) Surgeon General's report on smoking in adolescents and young adults.(11) Research has shown that extracurricular activities, such as team sports participation, are associated with preventing youth smoking.(12-16) Knowledge about these risk factors has informed interventions aiming to minimize adolescents' responsiveness to social risk factors(17) and policies to minimize adolescent's exposure to tobacco marketing and movies.(18)

In addition to individual risk factors, community influences such as frequent exposure to tobacco outlets(19) and tobacco outlet density,(20, 21) have been associated with youth smoking.

Compared to the compelling research on individual risk factors, evidence for community influence is mixed. Studies to date have been regional, have not extensively controlled for individual characteristics, and have applied varying approaches to density measurement.(21-24)

To our knowledge, studies have not yet tested whether the association between tobacco outlet density and proximity is confounded by race or social influences like sibling and friend smoking.

One study that controlled for individual sociodemographics failed to find an association between tobacco outlet density and youth smoking.(25)

1  
2  
3 Another area to consider in the context of tobacco outlet density and proximity is their  
4  
5 association with neighborhood characteristics, such as poverty, that may also pose a community  
6  
7 risk factor for smoking. Many studies show an association between tobacco outlet density and  
8  
9 neighborhoods characterized by high percentages of minorities(21, 23, 26-29) and low  
10  
11 income,(21, 23, 27-29) although this finding has not been consistent across regions.(26) Thus,  
12  
13 the finding that tobacco outlet density is related to youth smoking could also be confounded by  
14  
15 community factors. Nevertheless, the literature was robust enough for Cohen et al. to propose  
16  
17 policies to limit tobacco outlet density to reduce youth smoking,(30) raising the question of  
18  
19 whether individual or community-level factors have greater potential to prevent youth smoking.  
20  
21  
22  
23  
24  
25  
26

27 This study examines the role of access to tobacco outlets on youth smoking in a national sample  
28  
29 of U.S. adolescents. By access, we mean approaching, entering, exiting, and having exposure to  
30  
31 information imparted to potential customers about tobacco products, including visibility of in-  
32  
33 store and storefront advertising. Our focus is twofold—to assess the multivariate association with  
34  
35 youth smoking after controlling for other individual and community risk factors, and to compare  
36  
37 the sizes of these associations. It is the first to consider the role of community-level factors on  
38  
39 adolescent smoking in the U.S. nationwide, and the first to jointly examine individual social and  
40  
41 media influence risk factors with community-level factors. The intent of this work is to inform  
42  
43 interventional research and policies related to tobacco control efforts directed at youth.  
44  
45  
46  
47  
48  
49

## 50 **METHODS**

### 51 **Theoretical Framework**

52  
53  
54  
55  
56  
57  
58  
59  
60

1  
2  
3 This study is guided by Bronfenbrenner's Ecological Systems Theory,(31-33) which posits that  
4 development, health and well-being are situated within and shaped by the interactions that occur  
5  
6 between the individual and the four systems: microsystem (immediate environment),  
7  
8 mesosystem (connections between immediate environments, e.g., tobacco outlet density and  
9  
10 proximity), exosystem (indirect external environmental settings), and macrosystem (larger  
11  
12 cultural context).(31-33) For this study, we include individual-level variables that are well-  
13  
14 established risk factors for smoking: gender, race/ethnicity, socioeconomic status, and the  
15  
16 personality characteristic of sensation seeking. We also include the microsystem variables of  
17  
18 friend smoking, sibling smoking, exposure to smoking in movies, and team sports participation.  
19  
20 Our mesosystem variables include tobacco outlet density and distance to closest tobacco outlet.  
21  
22 Our exosystem variables include proportion population Black, proportion population Hispanic,  
23  
24 and proportion of families with income below the poverty level.  
25  
26  
27  
28  
29  
30  
31  
32  
33

### 34 **Sample Recruitment**

35  
36 A detailed description of the recruitment methods for study participants has been published  
37  
38 previously.(34) Briefly, between June and October 2003, 6522 U.S. adolescents aged 10-14  
39  
40 years were recruited through a random digit-dial telephone survey, which captured a  
41  
42 representative sample of U.S. adolescents. Five follow-up surveys were conducted at 8-month  
43  
44 intervals. This study involves the fifth follow-up survey conducted in the fall of 2007.  
45  
46 Interviewers successfully contacted 3055 (47%) of the original 6522 adolescents for this round.  
47  
48 Loss to follow up was higher among Blacks, older adolescents, those of lower socioeconomic  
49  
50 status, baseline smokers and higher sensation seekers. To address the minority attrition, a sample  
51  
52 of 598 Black adolescents (in the same age range) were recruited through lists of residential  
53  
54  
55  
56  
57  
58  
59  
60



1  
2  
3 numbers for U.S. census tracts for which African-Americans represented 20% or more of the  
4 population, resulting in available sample of 3653 for this study. Parental consent and adolescent  
5 assent were required for participation. The study was approved by the Committee for the  
6 Protection of Human Subjects at Dartmouth Medical School. The 3653 subjects lived in 3456  
7 unique census tracts, of which the majority (95.5%) contained only 1 subject; 144 tracts (4.2%)  
8 contained two subjects, and 11 tracts (0.3%) contained three subjects. Most adolescent  
9 residential locations were geocoded to their home street address (N=3167). When home street  
10 address was not available, they were geocoded to their ZIP code centroid (N=479), resulting in a  
11 final sample size of N=3646 for this study. We used a complete case analysis approach because  
12 only 110 subjects (3%) were missing data from one or more variables. The dependent and  
13 independent variables include dichotomous, polychotomous and continuous variables. Three  
14 variables (smoking intensity, socioeconomic status, and sensation seeking) are scales derived  
15 from two or more items, constructed using the “alpha, gen(varlist)” command in Stata 12. The  
16 sections below describe how we ascertained the information, constructed the variables, handled  
17 outliers, and rescaled the variables in order to compare the associations in our analytical models.  
18  
19  
20  
21  
22  
23  
24  
25  
26  
27  
28  
29  
30  
31  
32  
33  
34  
35  
36  
37  
38  
39  
40

### 41 **Outcome Variables**

42  
43 *Ever tried smoking:* Respondents were asked, “How many cigarettes have you smoked in your  
44 life” and those who responded “none” were categorized as never smokers. Those who responded  
45 in a category that indicated lifetime smoking were then asked about past 30 day smoking  
46 intensity.  
47  
48  
49  
50  
51  
52  
53  
54  
55  
56  
57  
58  
59  
60

1  
2  
3  
4  
5  
6  
7  
8  
9  
10  
11  
12  
13  
14  
15  
16  
17  
18  
19  
20  
21  
22  
23  
24  
25  
26  
27  
28  
29  
30  
31  
32  
33  
34  
35  
36  
37  
38  
39  
40  
41  
42  
43  
44  
45  
46  
47  
48  
49  
50  
51  
52  
53  
54  
55  
56  
57  
58  
59  
60

*Smoking intensity:* Smoking intensity was based on a composite measure using ~~three-two~~ items (alpha = 0.8~~27~~): “During the past 30 days, on how many days did you smoke cigarettes?” (none, 1-10 days, 11-29 days, or every day); ~~“During the past 30 days, on the weekdays that you smoked, how many cigarettes did you usually smoke per day?” (1 to 5, 6 to 10, 11 to 20, more than 20); “During the past 30 days, on the weekends that you smoked, how many cigarettes did you usually smoke per day?” (1 to 5, 6 to 10, 11 to 20, more than 20)~~How many cigarettes have you smoked in your life?” (none, a few puffs, one to 19 cigarettes, 20-100 cigarettes, more than 100 cigarettes). This measure had whole number values ranging from 1 to 7. We have used this measure in previously published work.(35)

### Individual risk factors

*Sociodemographics:* Individual measures of age, race and ethnicity were included.

Socioeconomic status (SES) was assessed using a standardized composite measure based on parent reports of their own education and household income (alpha = 0.69). The variable was centered around zero and a 1-point increase corresponded to a 1 standard deviation increase in SES.

*Sibling smoking:* Sibling smoking was assessed with the question, “Do any of your older brothers or sisters smoke cigarettes? (Yes, No)”

*Friend smoking:* Friend smoking was assessed with the question, “How many of your friends smoke cigarettes? Your choices are none, some, or most.”

1  
2  
3  
4  
5  
6 *Exposure to movie smoking:* Adolescents' exposure to movie smoking was estimated using the  
7  
8 Beach method(36) for top U.S. box-office hits from 2000-2006 (n = 384). Movies were content-  
9  
10 coded for smoking using previously validated methods.(36) Each adolescent survey was  
11  
12 programmed to randomly select 50 movie titles from the larger pool of 384 movies; respondents  
13  
14 were asked whether they had ever seen each movie title. To create a measure of exposure to  
15  
16 movie smoking, the number of smoking occurrences in films each adolescent had seen from  
17  
18 his/her unique list of 50 movies were summed. A proportion was generated by dividing this  
19  
20 number by the number of smoking occurrences that the adolescent would have seen had all 50  
21  
22 movies in the unique list been viewed and this proportion was multiplied by the number of  
23  
24 smoking occurrences in the entire parent sample of 384 movies.  
25  
26  
27  
28  
29  
30  
31

32 *Team sports participation:* Team sports participation was assessed with a single item, "Now I'd  
33  
34 like you to think about all the sports teams you played on during the past 12 months, including  
35  
36 all school, community or recreational teams. How many sports teams did you play on in the past  
37  
38 12 months?" Team sports participation was skewed right, with responses ranging up to 12, with  
39  
40 4 at the 95<sup>th</sup> percentile.  
41  
42  
43  
44  
45

46 *Sensation seeking:* Sensation seeking propensity was assessed using a short 5-item measure: "I  
47  
48 would like to explore strange places," "I like to do frightening things," "I like new and exciting  
49  
50 experiences, even if I have to break the rules," "I like to listen to loud music," "I like to do  
51  
52 dangerous things." Each of these items had the following response categories for each statement:  
53  
54  
55  
56  
57  
58  
59  
60

1  
2  
3 Strongly Agree, Disagree, Agree, Strongly Agree. These items had a Cronbach's alpha ( $\alpha$ ) of  
4  
5 0.70. The sensation seeking scale ranged from 0 to 15 with 12 at the 95<sup>th</sup> percentile.  
6  
7  
8  
9

## 10 **Community influences**

11  
12  
13  
14  
15 *Tobacco outlets:* To obtain a national dataset for tobacco outlets, we reviewed North American  
16  
17 Industry Classification System (NAICS) codes from 2007 and selected establishments that were  
18  
19 likely to sell tobacco products. The Office of Management and Budget (OMB) developed  
20  
21 NAICS for use by Federal statistical agencies in classifying all business establishments based on  
22  
23 their primary activity. We selected the 306,695 establishments coded as tobacco stores, grocery  
24  
25 stores, gas stations, and convenience stores and obtained geocoded data from the NAICS  
26  
27 Association. Although some businesses classified as department stores, liquor stores, and  
28  
29 pharmacies may sell tobacco as well (e.g. Wal-Mart, Costco, CVS), they were not classified as  
30  
31 tobacco outlets because they also include many stores that do not sell tobacco (e.g. Sears, Dollar  
32  
33 Stores, hospital pharmacies), and the NAICS categories do not allow differentiation between  
34  
35 sub-classes of stores that do or do not sell tobacco.  
36  
37  
38  
39  
40  
41  
42

43 *Tobacco outlet density using adaptive bandwidth kernel density estimation:* A nationwide  
44  
45 density surface of the tobacco outlets using adaptive bandwidth kernel density estimation  
46  
47 (KDE)(37, 38) and the LandScan™ Global Population Database(39) was produced. Adaptive  
48  
49 bandwidth KDE accounts for the underlying population density by limiting the bandwidth of  
50  
51 each tobacco outlet to the surrounding population of 1000 people. Setting a limit constrains the  
52  
53 influence of a single outlet to a small spatial extent where the population density is high (urban  
54  
55  
56  
57  
58  
59  
60

1  
2  
3 areas) while in rural areas the reach of the tobacco outlet is geographically larger. For sparsely  
4  
5 populated regions, the bandwidth of each tobacco outlet was limited to a 25 km radius to prevent  
6  
7 the density calculation from expanding to a spatially unreliable distance. The resultant density  
8  
9 surface covers the continental U.S. with pixels that are ~0.5 miles on each side and have a  
10  
11 density value in units of tobacco outlets per 1000 people. Each adolescent was assigned the  
12  
13 density value based on the pixel at their geocoded location.  
14  
15  
16  
17  
18  
19

20 *Distance to closest tobacco outlet:* ArcGIS Network Analyst (ESRI, Redlands, CA) was used to  
21  
22 compute the distance along the road network from the adolescent's geocoded location to the  
23  
24 closest tobacco outlet. Street data was obtained from the 2008 edition of StreetMap North  
25  
26 America,(40) which was created in 2005 and based on the ground conditions in 2003. Other  
27  
28 methods of measuring proximity were also considered, including Euclidian distance and driving  
29  
30 time. A sensitivity analysis demonstrated no difference between methods in the final model (data  
31  
32 not shown).  
33  
34  
35  
36  
37  
38

39 *Census tract measures of race/ethnicity and poverty:* Community characteristics that might be  
40  
41 confounders for tobacco outlet density and proximity were included. Using the U.S. Census 2000  
42  
43 data, the proportion population Black, the proportion population Hispanic, and the proportion of  
44  
45 families with income below the poverty level for each adolescent's census tract were calculated.  
46  
47  
48  
49

## 50 **Statistical analysis**

51  
52 Pearson correlation coefficients were used to describe the association among community  
53  
54 influences. Multiple logistic regression was used to assess the association between individual and  
55  
56  
57  
58  
59  
60

1  
2  
3 environmental risk factors and ever tried smoking, and multiple ordered logistic regression was  
4 used to assess the odds of being higher on the frequency of smoking scale among smokers.  
5  
6 Because the majority of the sample resided in unique census tracts, it was not necessary to fit  
7  
8 hierarchical models. Instead, the environmental variables were entered as individual-level risk  
9  
10 indicators of the adolescent's environment. Some variables (movie smoking exposure, sensation  
11  
12 seeking, team sports participation, tobacco outlet density, distance to the closest outlet,  
13  
14 proportion population Black, proportion population Hispanic, and proportion families with  
15  
16 incomes below the poverty level) were skewed right. In order to limit the influence of high  
17  
18 outliers, values higher than the 95<sup>th</sup> percentile were trimmed to the 95<sup>th</sup> percentile. Additionally,  
19  
20 to allow a comparison of effect size among the variables, friend smoking, movie smoking  
21  
22 exposure, tobacco outlet density, proportion of families with incomes below the poverty level,  
23  
24 sensation seeking, and team sports participation were rescaled so that the lowest value was 0 and  
25  
26 the highest value was 1. This scaling procedure allowed a comparison between the dose-response  
27  
28 between individual/community measures and adolescent smoking. Ninety-five percent  
29  
30 confidence intervals were assessed based on two-tailed hypothesis assumptions.  
31  
32  
33  
34  
35  
36  
37  
38  
39  
40

## 41 RESULTS

42  
43  
44  
45  
46 *Individual and community characteristics:* Table 1 describes the characteristics of the  
47  
48 adolescents and their correlation with the two smoking outcomes. Thirty-six percent had tried  
49  
50 smoking, and this percentage increased across age categories from 18 to 56 percent in 13 and 18  
51  
52 year olds respectively. Among smokers, mean smoking intensity also increased with age. There  
53  
54 were no large differences in tried smoking prevalence across gender or race, but smoking  
55  
56  
57  
58  
59  
60

1  
2  
3 intensity was much lower among Black and Hispanic smokers compared with Whites and those  
4  
5 of mixed race. The correlation between community variables and smoking was an order of  
6  
7 magnitude lower than correlations with individual characteristics. Whereas tobacco outlet  
8  
9 density was positively correlated with trying smoking, it was negatively correlated with smoking  
10  
11 intensity. The largest correlation for community predictors was  $-0.1319$ , between proportion  
12  
13 population Black and smoking intensity, also consistent with lower smoking intensity among  
14  
15 minorities at the individual level.  
16  
17  
18  
19  
20  
21  
22  
23  
24  
25  
26  
27  
28  
29  
30  
31  
32  
33  
34  
35  
36  
37  
38  
39  
40  
41  
42  
43  
44  
45  
46  
47  
48  
49  
50  
51  
52  
53  
54  
55  
56  
57  
58  
59  
60

Table 1. Individual and community risk factors and smoking outcomes (N=3646).

| Variable                          | n                         | Proportion of Sample | Proportion Who Have Tried Smoking | Smoking Intensity Scale Mean |
|-----------------------------------|---------------------------|----------------------|-----------------------------------|------------------------------|
| <b>Individual descriptors</b>     |                           |                      |                                   |                              |
| <b>Categorical</b>                |                           |                      |                                   |                              |
| Age                               |                           |                      |                                   |                              |
| 13                                | 114                       | 0.03                 | 0.18                              | <u>0.30</u> 1.81             |
| 14                                | 722                       | 0.20                 | 0.24                              | <u>0.23</u> 1.73             |
| 15                                | 827                       | 0.23                 | 0.29                              | <u>0.34</u> 2.04             |
| 16                                | 804                       | 0.22                 | 0.37                              | <u>0.39</u> 2.21             |
| 17                                | 769                       | 0.21                 | 0.43                              | <u>0.54</u> 2.57             |
| 18                                | 410                       | 0.11                 | 0.56                              | <u>0.84</u> 3.10             |
| Gender                            |                           |                      |                                   |                              |
| 23                                | Male                      | 1,810                | 0.50                              | <u>0.49</u> 2.39             |
| 24                                | Female                    | 1,836                | 0.50                              | <u>0.43</u> 2.32             |
| Race/ethnicity                    |                           |                      |                                   |                              |
| 27                                | White                     | 2,091                | 0.57                              | <u>0.59</u> 2.74             |
| 28                                | Black                     | 818                  | 0.22                              | <u>0.29</u> 1.61             |
| 29                                | Hispanic                  | 481                  | 0.13                              | <u>0.29</u> 1.89             |
| 30                                | Mixed race/other          | 256                  | 0.07                              | <u>0.57</u> 2.37             |
| Sibling smokes                    |                           |                      |                                   |                              |
| 33                                | No                        | 2,924                | 0.80                              | <u>0.43</u> 2.29             |
| 34                                | Yes                       | 720                  | 0.20                              | <u>0.55</u> 2.51             |
| Friend smoking                    |                           |                      |                                   |                              |
| 37                                | None                      | 1,615                | 0.44                              | <u>0.05</u> 1.27             |
| 38                                | Some                      | 1,711                | 0.47                              | <u>0.35</u> 2.15             |
| 39                                | Most                      | 316                  | 0.09                              | <u>1.29</u> 4.23             |
| Ever smoked                       |                           |                      |                                   |                              |
| 41                                | No                        | 2,349                | 0.64                              |                              |
| 42                                | Yes                       | 1,297                | 0.36                              |                              |
| <b>Continuous</b>                 |                           |                      |                                   |                              |
| Smoking Intensity (among smokers) |                           |                      |                                   |                              |
| 51                                |                           | <u>0</u> 1           | <u>0</u> 1,43                     |                              |
| 52                                | Socioeconomic status      | 0.08                 | -0.65,0.65                        | -0.12                        |
| 53                                | Movie smoking exposure    | 558                  | 285,883                           | 0.21                         |
| 54                                | Team sports participation | 1                    | 0,2                               | -0.08                        |
| 55                                | Sensation seeking         | 12                   | 10,14                             | 0.31                         |
|                                   |                           | Median               | Quartiles 1 and 3                 | (correlation)                |
|                                   |                           |                      |                                   | (correlation)                |



## Community descriptors

|                                             |      |           |       |         |
|---------------------------------------------|------|-----------|-------|---------|
| Tobacco outlet density (per 1000 people)    | 0.34 | 0.03,1.12 | 0.03  | -0.075  |
| Distance (mi) to nearest outlet             | 0.59 | 0.29,1.19 | 0.001 | 0.03    |
| Proportion population Black <sup>a</sup>    | 0.03 | 0.01,0.21 | -0.03 | -0.193  |
| Proportion population Hispanic <sup>a</sup> | 0.03 | 0.01,0.09 | 0.02  | -0.1008 |
| Poverty <sup>a,b</sup>                      | 0.06 | 0.03,0.11 | 0.02  | -0.1207 |

<sup>a</sup>For each adolescent's census tract.

<sup>b</sup>Proportion of families with income below the poverty level.

The community characteristics were also correlated with each other. Higher tobacco outlet density was associated with larger proportions of families with incomes below the poverty level, proportion of the population that was Black and Hispanic (Table 2). Tobacco outlet density decreased as distance to nearest outlet increased (correlation = -0.32), but the relationship was not linear. There was a wide range for distance to closest outlet among adolescents living in low tobacco outlet density areas, and a wide range of densities among adolescents living close to an outlet, justifying the consideration of both factors as being independently associated with smoking behavior.

Table 2. Correlation among the environmental descriptors.

| Environmental descriptor                      | Correlation |       |       |      |      |
|-----------------------------------------------|-------------|-------|-------|------|------|
|                                               | 1           | 2     | 3     | 4    | 5    |
| 1 Tobacco outlet density (per 1000 people)    | 1.00        |       |       |      |      |
| 2 Distance (mi) to nearest outlet             | -0.32       | 1.00  |       |      |      |
| 3 Proportion population Black <sup>a</sup>    | 0.27        | -0.17 | 1.00  |      |      |
| 4 Proportion population Hispanic <sup>a</sup> | 0.26        | -0.13 | -0.10 | 1.00 |      |
| 5 Poverty <sup>a,b</sup>                      | 0.39        | -0.12 | 0.52  | 0.38 | 1.00 |

<sup>a</sup>For each adolescent's census tract.

<sup>b</sup>Proportion of families with income below the poverty level.

*Relation with ever tried smoking:* Overall, 35.6 percent of respondents reported ever having tried a cigarette. Being male, being Hispanic, having sibling(s) who smoke, being of lower socioeconomic status, having friends who smoke, being older, having more exposure to movie smoking, not playing team sports, being higher in sensation seeking, and living in a neighborhood with higher tobacco outlet density were all significantly associated with ever trying smoking in the unadjusted models (Table 3). Two types of multivariate models were built to test these associations with ever trying smoking. In the first, only community-level factors

1  
2  
3 were included; it showed a significant inverse association with proportion of the population that  
4 was Black and a significant association with census tract poverty. In the second multivariate  
5 model, individual characteristics were added, which substantially improved model fit. Whereas  
6 most individual characteristics (sibling smoking, socioeconomic status, friend smoking, age,  
7 movie smoking exposure, team sports participation, and sensation seeking) were significantly  
8 associated with ever trying smoking in the second model, none of the community characteristics  
9 were significantly associated with ever trying smoking. Notably, the coefficient for tobacco  
10 outlet density changed little across models and, although small, remained close to statistical  
11 significance, in contrast to the other community predictors.  
12  
13  
14  
15  
16  
17  
18  
19  
20  
21  
22  
23  
24  
25  
26  
27  
28  
29  
30  
31  
32  
33  
34  
35  
36  
37  
38  
39  
40  
41  
42  
43  
44  
45  
46  
47  
48  
49  
50  
51  
52  
53  
54  
55  
56  
57  
58  
59  
60

Table 3. Crude and multivariate association with ever tried smoking.

| Variable                                                       | Crude Odds Ratio | Community only <sup>a</sup><br>n = 3,621 |            | All variables <sup>b</sup><br>n = 3,543 |            |
|----------------------------------------------------------------|------------------|------------------------------------------|------------|-----------------------------------------|------------|
|                                                                |                  | Adj Odds Ratio                           | 95% CI     | Adj Odds Ratio                          | 95% CI     |
| Individual characteristics                                     |                  |                                          |            |                                         |            |
| Categorical                                                    |                  |                                          |            |                                         |            |
| Gender                                                         |                  |                                          |            |                                         |            |
| Male                                                           | Ref              |                                          |            |                                         |            |
| Female                                                         | 0.84*            |                                          |            | 1.03                                    | 0.88,1.21  |
| Race/ethnicity                                                 |                  |                                          |            |                                         |            |
| White                                                          | Ref              |                                          |            |                                         |            |
| Black                                                          | 0.85             |                                          |            | 0.85                                    | 0.62,1.18  |
| Hispanic                                                       | 1.24*            |                                          |            | 1.18                                    | 0.88,1.59  |
| Mixed race/other                                               | 1.13             |                                          |            | 1.08                                    | 0.77,1.50  |
| Sibling smokes                                                 |                  |                                          |            |                                         |            |
| No                                                             | Ref              |                                          |            |                                         |            |
| Yes                                                            | 2.85*            |                                          |            | 2.13*                                   | 1.75,2.59  |
| Friend smoking                                                 |                  |                                          |            |                                         |            |
| None                                                           | Ref              |                                          |            |                                         |            |
| Some                                                           | 3.93*            |                                          |            | 2.60*                                   | 2.19,3.10  |
| Most                                                           | 17.14*           |                                          |            | 7.01*                                   | 5.05,9.74  |
| Continuous                                                     |                  |                                          |            |                                         |            |
| Age (for each additional year)                                 | 1.39*            |                                          |            | 1.23*                                   | 1.16,1.31  |
| Socioeconomic status                                           | 0.76*            |                                          |            | 0.82*                                   | 0.74,0.91  |
| Movie smoking exposure                                         | 5.14*            |                                          |            | 2.66*                                   | 1.95,3.63  |
| Team sports participation                                      | 0.59*            |                                          |            | 0.69*                                   | 0.54,0.89  |
| Sensation seeking                                              | 20.71*           |                                          |            | 7.72*                                   | 5.26,11.34 |
| Community characteristics                                      |                  |                                          |            |                                         |            |
| Tobacco outlet density (per 1000 people)                       | 1.30*            | 1.28                                     | 0.97,1.70  | 1.27                                    | 0.92,1.76  |
| Tobacco outlet proximity (distance in miles to nearest outlet) | 0.86             | 0.94                                     | 0.69,1.27  | 0.96                                    | 0.67,1.36  |
| Proportion population Black <sup>c</sup>                       | 0.80             | 0.59*                                    | 0.42,0.83  | 0.93                                    | 0.53,1.61  |
| Proportion population Hispanic <sup>c</sup>                    | 1.47             | 0.87                                     | 0.49,1.55  | 0.88                                    | 0.41,1.87  |
| Poverty <sup>c,d</sup>                                         | 2.06             | 3.66*                                    | 1.07,12.42 | 0.74                                    | 0.17,3.22  |

\*p&lt;0.05

<sup>a</sup>Pseudo R<sup>2</sup> = 0.003<sup>b</sup>Pseudo R<sup>2</sup> = 0.20<sup>c</sup>For each adolescent's census tract<sup>d</sup>Proportion of families with income below the poverty level

1  
2  
3  
4  
5  
6  
7  
8 *Relation with smoking intensity:* Most of the respondents who had tried smoking (73%) reported  
9  
10 no smoking in the past 30 days. Multivariate model results for smoking intensity among the  
11  
12 experimental smokers are reported in Table 4. Minority status, ~~sibling smoking~~ friend smoking,  
13  
14 age, team sports participation, sensation seeking, tobacco outlet density, proportion population  
15  
16 Black and Hispanic, and poverty, were all associated with smoking intensity at the bivariate  
17  
18 level. In the community-only multivariate model, proportion population Black and Hispanic  
19  
20 retained a significant inverse relation with smoking intensity. In the full model, friend smoking,  
21  
22 age, and sensation seeking were all associated with higher intensity and being Black or Hispanic  
23  
24 and participating in team sports associated with lower intensity. None of the community  
25  
26 characteristics retained a statistically significant association with smoking intensity.  
27  
28  
29  
30  
31  
32

33  
34 The tobacco outlet density—smoking association was not significantly different for those 18  
35  
36 years and older in either the tried smoking or the smoking intensity model. Additionally,  
37  
38 excluding subjects for whom Zip Code centroid was used as a proxy for home address had little  
39  
40 impact on the results.  
41  
42  
43  
44  
45  
46  
47  
48  
49  
50  
51  
52  
53  
54  
55  
56  
57  
58  
59  
60

Table 4. Crude and multivariate association with smoking intensity among experimental smokers.

| Variable                                                       | Crude Odds Ratio | Community only <sup>a</sup><br>n = 1,289 |             | All variables <sup>b</sup><br>n = 1,263 |                |
|----------------------------------------------------------------|------------------|------------------------------------------|-------------|-----------------------------------------|----------------|
|                                                                |                  | Adj Odds Ratio                           | 95% CI      | Adj Odds Ratio                          | 95% CI         |
| Individual characteristics                                     |                  |                                          |             |                                         |                |
| Categorical                                                    |                  |                                          |             |                                         |                |
| Gender                                                         |                  |                                          |             |                                         |                |
| Male                                                           | Ref              |                                          |             | 10.059                                  |                |
| Female                                                         | 0.8993           |                                          |             | 9                                       | 0.8475, 1.330  |
| Race/ethnicity                                                 |                  |                                          |             |                                         |                |
| White                                                          | Ref              |                                          |             |                                         | 0.3022, 0.798  |
| Black                                                          | 0.259*           |                                          |             | 0.482*                                  | 4              |
|                                                                |                  |                                          |             | 0.4650                                  |                |
| Hispanic                                                       | 0.407*           |                                          |             | *                                       | 0.310, 0.6983  |
|                                                                | 0.60*8           |                                          |             | 0.53*8                                  | 0.3450, 0.4.85 |
| Mixed race/other                                               | 5                |                                          |             | 5                                       | 42             |
| Sibling smokes                                                 |                  |                                          |             |                                         |                |
| No                                                             | Ref              |                                          |             |                                         |                |
| Yes                                                            | 1.2133           |                                          |             | 04.980                                  | 0.7684, 1.246  |
|                                                                | ±                |                                          |             | 8                                       | 5              |
| Friend smoking                                                 |                  |                                          |             |                                         |                |
| None                                                           | Ref              |                                          |             |                                         |                |
|                                                                | 49.734           |                                          |             | 36.378                                  | 23.3729, 412.  |
| Some                                                           | 4*               |                                          |             | *                                       | 8139           |
|                                                                | 3357.6           |                                          |             | 2032.2                                  | 136.2243, 31   |
| Most                                                           | 289*             |                                          |             | 798*                                    | 66.0849        |
| Continuous                                                     |                  |                                          |             |                                         |                |
| Age (for each additional year)                                 | 1.37*            |                                          |             | 1.323*                                  | 1.210, 1.448   |
|                                                                | 10.109           |                                          |             | 10.099                                  | 0.9482, 1.264  |
| Socioeconomic status                                           | 8                |                                          |             | 8                                       | 7              |
|                                                                |                  |                                          |             | 10.048                                  | 0.6849, 1.593  |
| Movie smoking exposure                                         | 1.2914           |                                          |             | 4                                       | 4              |
|                                                                |                  |                                          |             | 0.3846                                  | 0.2630, 0.557  |
| Team sports participation                                      | 0.365*           |                                          |             | *                                       | 2              |
|                                                                | 124.95           |                                          |             | 6.5789                                  | 3.7142, 113.6  |
| Sensation seeking                                              | 5*               |                                          |             | *                                       | 488            |
| Community characteristics                                      |                  |                                          |             |                                         |                |
| Tobacco outlet density (per 1000 people)                       | 0.62*9           | 04.980                                   | 0.642, 1.50 | 3                                       | 0.7066, 12.79  |
|                                                                |                  | 74                                       |             | 1.115                                   | 03             |
| Tobacco outlet proximity (distance in miles to nearest outlet) | 1.3227           | 0.7683                                   | 0.489, 1.20 |                                         |                |
|                                                                |                  | 40                                       |             | 0.7482                                  | 0.456, 1.2046  |

|                                             |                     |                           |                                            |                           |                                             |
|---------------------------------------------|---------------------|---------------------------|--------------------------------------------|---------------------------|---------------------------------------------|
| Proportion population Black <sup>c</sup>    | 0. <u>1523</u><br>* | 0.1 <u>28</u> *           | 0.0 <u>79</u> ,0. <u>22</u><br><u>37</u>   | 0. <u>4297</u>            | 0. <u>1833</u> , <u>12.00</u><br><u>84</u>  |
| Proportion population Hispanic <sup>c</sup> | 0.2 <u>04</u> *     | 0.1 <u>36</u> *           | 0.0 <u>65</u> ,0. <u>32</u><br><u>45</u>   | 0. <u>4335</u>            | 0. <u>1409</u> , <u>1.334</u><br><u>2</u>   |
| Poverty <sup>c,d</sup>                      | 0.0 <u>26</u> *     | <u>12.543</u><br><u>4</u> | 0.2 <u>45</u> , <u>924.</u><br><u>9645</u> | <u>10.147</u><br><u>8</u> | 0. <u>1305</u> , <u>104.0</u><br><u>343</u> |

\*p<0.05

<sup>a</sup>Pseudo R<sup>2</sup> = 0.024

<sup>b</sup>Pseudo R<sup>2</sup> = 0.154

<sup>c</sup>For each adolescent's census tract.

<sup>d</sup>Proportion of families with income below the poverty level

## DISCUSSION

This study highlights the much stronger association between individual health risk factors and youth smoking behavior compared to community risk factors. Two studies that have examined the relationship between tobacco outlet density or proximity and youth smoking have suggested that tobacco outlet density (but not proximity) is associated with youth smoking.(21, 22)

Consistent with those studies, in the unadjusted model we saw a statistically significant association between tobacco outlet density and youth smoking, but not after accounting for additional community and individual risk factors for youth smoking. More importantly, the magnitudes of the community associations with youth smoking were small compared to individual risk factors. Thus, regardless of whether the association of tobacco outlet density reached accepted standards for statistical significance, the small potential effect across a broad range of tobacco outlet densities suggests that policies designed to lower density would have only a small impact on adolescent smoking. In contrast, the associations between team sports participation and both smoking outcomes were large enough to suggest that interventions and policies aiming to support those activities could help prevent adolescent smoking.

1  
2  
3  
4  
5  
6 This study used Bronfenbrenner's Ecological Systems Theory to frame the possible joint effects  
7  
8 of individual-level, microsystem, mesosystem, and exosystem variables on youth smoking.  
9

10 When variables were scaled so as to compare effect sizes, our findings indicated a relative  
11  
12 importance of individual-level variables compared to the community variables we studied. We  
13  
14 suggest empirical multi-level studies pay attention to estimating effects that allow for such  
15  
16 comparisons, in addition to focusing on statistical significance. Although we found no strong  
17  
18 associations with smoking for the community variables studied, this study does not rule out the  
19  
20 possibility that other neighborhood characteristics, such as measures of social capital or  
21  
22 neighborhood smoking, may have an important impact on youth smoking. In fact, one study  
23  
24 using the Brofenbrenner model found that neighborhood rates of youth smoking affected  
25  
26 adolescent smoking trajectories, over and above individual risk factors.(41)  
27  
28  
29  
30  
31  
32  
33

34 The association between some risk factors and smoking was present for trying smoking but not  
35  
36 smoking intensity among experimental smokers, underlying the importance of modeling  
37  
38 different smoking transitions separately. Trying smoking is strongly influenced by social risk  
39  
40 factors (sibling smoking, friend smoking, movie smoking, and team sports participation). Among  
41  
42 experimental smokers, smoking intensity continues to be associated with smoking by some  
43  
44 social influence factors—peers, team sports, and exposure to tobacco marketing,(35, 42) but is  
45  
46 also is predominantly driven by addiction processes.(43, 44) In this study, sensation seeking was  
47  
48 a risk factor for both trying smoking and higher smoking intensity, consistent with other  
49  
50 research.(45) Sensation seeking level probably captures, in part, biological characteristics that  
51  
52 promote experience seeking(46) and tolerance of deviance,(47) but it may also be associated  
53  
54  
55  
56  
57  
58  
59  
60



1  
2  
3 with higher sensitivity to the addictive influence of nicotine.(48) Given its large association with  
4  
5 both smoking outcomes in this study, research on using sensation seeking to target high risk  
6  
7 adolescents,(49) modifying risk factors that affect sensation seeking deserve greater emphasis.  
8  
9 For example, one study suggested that higher exposure to adult-rated movies resulted in higher  
10  
11 growth in sensation seeking during adolescence.(50)  
12  
13

14  
15  
16  
17 Consistent with other studies that have distinguished between trying smoking and smoking  
18  
19 intensity,(51) some characteristics were associated with one outcome but not the other. Exposure  
20  
21 to smoking in movies was associated with trying smoking but not smoking intensity, consistent  
22  
23 with some other reports.(35, 42) Minority youth tried smoking at rates similar to White youth,  
24  
25 but minority ever smokers had much lower smoking intensity than Whites. This finding is not  
26  
27 surprising, given that minority adolescents have lower rates of smoking compared with  
28  
29 Whites,(52, 53) with larger temporal declines in smoking among Black adolescents(54) and  
30  
31 lower rates of progression to regular use.(55) Studies of trying smoking have been inconsistent,  
32  
33 with some confirming lower rates among minorities,(56) whereas others,(57) including this one,  
34  
35 did not. Why minority youth that try smoking have lower smoking intensity than Whites  
36  
37 deserves further research, given that the finding holds across studies;(52, 55) minority  
38  
39 adolescents could be less susceptible to nicotine addiction in its earliest stages or social or family  
40  
41 circumstances could reduce the likelihood of progression of experimental smoking during  
42  
43 adolescence.  
44  
45  
46  
47  
48  
49  
50

51  
52  
53 This study was limited in that it relied on cross-sectional data and therefore cannot address  
54  
55 | temporality. However, it would be ~~an~~ unusual to see a weak correlation in a cross-sectional study  
56  
57  
58  
59  
60

1  
2  
3 become a key predictor in a longitudinal one. The national scope of the study could be viewed as  
4 a strength but precluded us from directly assessing where tobacco outlets were in each  
5  
6  
7  
8 community. Instead, we relied on available commercial data, subject to higher levels of error.  
9  
10 Although this limitation could have widened confidence intervals due to random error, we have  
11  
12 no reason to believe that the error is larger in some neighborhoods than others, which would lead  
13  
14 to biased estimates. We suggest that, even if the results were statistically significant, the size of  
15  
16 the associations were still small for tobacco outlet density and the other community  
17  
18 characteristics we measured.  
19  
20  
21  
22  
23

24 Compared to individual risk factors, tobacco outlet density might be less relevant for minors who  
25  
26 are legally constrained in their purchase of tobacco. One previous study of adolescent smoking  
27  
28 found no association for tobacco outlet density but a positive association between access—the  
29  
30 proportion of stores that illegally sell to minors—and youth smoking.<sup>(25)</sup> This suggests that  
31  
32 tobacco outlet density could be more important in determining smoking patterns among adults,  
33  
34 who are less constrained in their purchase of tobacco at retail outlets. Although we found no  
35  
36 evidence for that in the small number of adults present in this sample, further study in adult  
37  
38 samples may be indicated. Our study did not explicitly measure exposure to tobacco storefront  
39  
40 advertising in the context of community-level influences and therefore cannot address this issue  
41  
42 explicitly—we cannot rule out a storefront advertising influence without more elaborate  
43  
44 measurements of access to this particular aspect of tobacco retailing. Tobacco outlet density  
45  
46 should be a proxy for exposure to storefront advertising but would not capture individual  
47  
48 differences in how adolescents respond to or remember it, which could explain differences  
49  
50 between our findings and those of others who assessed recollection of storefront advertising.<sup>(58)</sup>  
51  
52  
53  
54  
55  
56  
57  
58  
59  
60

1  
2  
3 Finally, we studied tobacco density and proximity at the home, not the school. McCarthy et al.  
4  
5 looked at the relationship between tobacco retail density near schools and youth tobacco use and  
6  
7 found that the effects were limited to trying smoking (not established smoking), and only among  
8  
9 high school students in urban areas.(59) However, their work did not include the depth of  
10  
11 individual-level variables presented in this analysis. Future studies should consider the role of  
12  
13 school density and proximity to tobacco outlets around schools in context of individual risk  
14  
15 factors.  
16  
17  
18  
19  
20

21  
22 This study adds to the growing body of evidence that public health campaigns to prevent and  
23  
24 reduce youth smoking should emphasize individual risk factors for smoking, including  
25  
26 supporting participation in team sports, minimizing exposure to movie smoking, addressing the  
27  
28 social influence of friend smoking, and addressing experience seeking among high sensation-  
29  
30 seekers.  
31  
32  
33  
34  
35

36 **Acknowledgements** None.

37  
38 **Funding** This work was supported by the National Institutes of Health CA77026 (James D.  
39  
40 Sargent) and 1K23AG036934 (Ethan Berke).  
41  
42

43 **Competing interests** None.  
44  
45  
46  
47  
48  
49  
50  
51  
52  
53  
54  
55  
56  
57  
58  
59  
60

## REFERENCES

1. Sargent JD, Tanski S, Stoolmiller M, Hanewinkel R. Using sensation seeking to target adolescents for substance use interventions. *Addiction*. 2010;105(3):506-14. Epub 2010/04/21.
2. Stephenson MT, Helme DW. Authoritative parenting and sensation seeking as predictors of adolescent cigarette and marijuana use. *J Drug Education*. 2006;36(3):247-70.
3. Bauman KE, Foshee VA, Linzer MA, Koch GG. Effect of parental smoking classification on the association between parental and adolescent smoking. *Addict Behav*. 1990;15(5):413-22.
4. Conrad KM, Flay BR, Hill D. Why children start smoking cigarettes: predictors of onset. *Br J Addict*. 1992;87(12):1711-24.
5. Fleming CB, Kim H, Harachi TW, Catalano RF. Family processes for children in early elementary school as predictors of smoking initiation. *The Journal of adolescent health : official publication of the Society for Adolescent Medicine*. 2002;30(3):184-9.
6. Jackson C, Henriksen L. Do as I say: parent smoking, antismoking socialization, and smoking onset among children. *Addict Behav*. 1997;22(1):107-14.
7. Biglan A, Duncan TE, Ary DV, Smolkowski K. Peer and parental influences on adolescent tobacco use. *J Behav Med*. 1995;18(4):315-30.
8. Flay BR, Hu FB, Siddiqui O, Day LE, Hedeker D, Petraitis J, et al. Differential influence of parental smoking and friends' smoking on adolescent initiation and escalation of smoking. *J Health Soc Behav*. 1994;35(3):248-65.
9. DiFranza JR, Wellman RJ, Sargent JD, Weitzman M, Hipple BJ, Winickoff JP. Tobacco promotion and the initiation of tobacco use: assessing the evidence for causality. *Pediatrics*. 2006;117(6):e1237-48.
10. National Cancer Institute. The Role of the Media in Promoting and Reducing Tobacco Use. Tobacco Control Monograph No. 19. Bethesda, MD: U.S. Department of Health and Human Services, National Institutes of Health, National Cancer Institute. NIH Pub. No. 07-6242, 2008 June. Report No.
11. U.S. Department of Health and Human Services. Preventing Tobacco Use Among Youth and Young Adults: A Report of the Surgeon General. Atlanta, GA: U.S. Department of Health and Human Services, Centers for Disease Control and Prevention, National Center for Chronic Disease Prevention and Health Promotion, Office on Smoking and Health, 2012.
12. Adachi-Mejia AM, Primack BA, Beach ML, Titus-Ernstoff L, Longacre MR, Weiss JE, et al. Influence of movie smoking exposure and team sports participation on established smoking. *Arch Pediatr Adolesc Med*. 2009;163(7):638-43. Epub 2009/07/08.
13. Brown KS, Cameron R, Madill C, Payne ME, Filsinger S, Manske SR, et al. Outcome evaluation of a high school smoking reduction intervention based on extracurricular activities. *Prev Med*. 2002;35(5):506-10. Epub 2002/11/15.
14. Shilts L. The relationship of early adolescent substance use to extracurricular activities, peer influence, and personal attitudes. *Adolescence*. 1991;26(103):613-7. Epub 1991/01/01.
15. Terry-McElrath YM, O'Malley PM. Substance use and exercise participation among young adults: parallel trajectories in a national cohort-sequential study. *Addiction*. 2011;106(10):1855-65; discussion 66-7. Epub 2011/05/13.
16. Terry-McElrath YM, O'Malley PM, Johnston LD. Exercise and substance use among American youth, 1991-2009. *Am J Prev Med*. 2011;40(5):530-40. Epub 2011/04/19.

17. Perry CL. Results of prevention programs with adolescents. *Drug Alcohol Depend.* 1987;20(1):13-9.
18. Master Settlement Agreement. <http://www.naag.org/issues/tobacco/index.php?sdpid=919>. 1998 [June 16, 2005]; Available from: <http://www.naag.org/issues/tobacco/index.php?sdpid=919>.
19. Feighery EC, Henriksen L, Wang Y, Schleicher NC, Fortmann SP. An evaluation of four measures of adolescents' exposure to cigarette marketing in stores. *Nicotine Tob Res.* 2006;8(6):751-9. Epub 2006/11/30.
20. Henriksen L, Feighery EC, Schleicher NC, Fortmann SP. Receptivity to alcohol marketing predicts initiation of alcohol use. *The Journal of adolescent health : official publication of the Society for Adolescent Medicine.* 2008;42(1):28-35.
21. Novak SP, Reardon SF, Raudenbush SW, Buka SL. Retail tobacco outlet density and youth cigarette smoking: a propensity-modeling approach. *Am J Public Health.* 2006;96(4):670-6. Epub 2006/03/02.
22. Henriksen L, Feighery EC, Schleicher NC, Cowling DW, Kline RS, Fortmann SP. Is adolescent smoking related to the density and proximity of tobacco outlets and retail cigarette advertising near schools? *Prev Med.* 2008;47(2):210-4. Epub 2008/06/12.
23. Ogneva-Himmelberger Y, Ross L, Burdick W, Simpson SA. Using geographic information systems to compare the density of stores selling tobacco and alcohol: youth making an argument for increased regulation of the tobacco permitting process in Worcester, Massachusetts, USA. *Tob Control.* 2010;19(6):475-80. Epub 2010/09/08.
24. West JH, Blumberg EJ, Kelley NJ, Hill L, Sipan CL, Schmitz KE, et al. Does proximity to retailers influence alcohol and tobacco use among Latino adolescents? *J Immigr Minor Health.* 2010;12(5):626-33. Epub 2009/11/26.
25. Pokorny SB, Jason LA, Schoeny ME. The relation of retail tobacco availability to initiation and continued smoking. *J Clin Child Adolesc Psychol.* 2003;32(2):193-204.
26. Peterson NA, Lowe JB, Reid RJ. Tobacco outlet density, cigarette smoking prevalence, and demographics at the county level of analysis. *Subst Use Misuse.* 2005;40(11):1627-35. Epub 2005/10/29.
27. Schneider JE, Reid RJ, Peterson NA, Lowe JB, Hughey J. Tobacco outlet density and demographics at the tract level of analysis in Iowa: implications for environmentally based prevention initiatives. *Prev Sci.* 2005;6(4):319-25. Epub 2005/09/16.
28. Yu D, Peterson NA, Sheffer MA, Reid RJ, Schnieder JE. Tobacco outlet density and demographics: analysing the relationships with a spatial regression approach. *Public Health.* 2010;124(7):412-6. Epub 2010/06/15.
29. Hyland A, Travers MJ, Cummings KM, Bauer J, Alford T, Wiczorek WF. Tobacco outlet density and demographics in Erie County, New York. *Am J Public Health.* 2003;93(7):1075-6. Epub 2003/07/02.
30. Cohen JE, Anglin L. Outlet density: a new frontier for tobacco control. *Addiction.* 2009;104(1):2-3. Epub 2009/01/13.
31. Bronfenbrenner U. Toward an experimental ecology of human development. *American Psychologist.* 1977;32(7):513-31.
32. Bronfenbrenner U. The ecology of developmental processes. In: W. Damon, RM Lerner, editors. *Handbook of Child Psychology.* 5 ed. New York: John Wiley & Sons, Inc.; 1998. p. 993-1028.
33. Bronfenbrenner U. Developmental Research, Public Policy, and the Ecology of Childhood. *Child Dev.* 1974;45(1):1-5.
34. Sargent J, Beach M, Adachi-Mejia A, Gibson J, Titus-Ernstoff L, Carusi C, et al. Exposure to movie smoking: Its relation to smoking initiation among U.S. adolescents. *Pediatrics.* 2005;116(5):1183-91.

- 1
  - 2
  - 3
  - 4
  - 5
  - 6
  - 7
  - 8
  - 9
  - 10
  - 11
  - 12
  - 13
  - 14
  - 15
  - 16
  - 17
  - 18
  - 19
  - 20
  - 21
  - 22
  - 23
  - 24
  - 25
  - 26
  - 27
  - 28
  - 29
  - 30
  - 31
  - 32
  - 33
  - 34
  - 35
  - 36
  - 37
  - 38
  - 39
  - 40
  - 41
  - 42
  - 43
  - 44
  - 45
  - 46
  - 47
  - 48
  - 49
  - 50
  - 51
  - 52
  - 53
  - 54
  - 55
  - 56
  - 57
  - 58
  - 59
  - 60
35. Sargent JD, Hanewinkel R. Comparing the effects of entertainment media and tobacco marketing on youth smoking in Germany. *Addiction*. 2009;104:815-23.
36. Sargent JD, Worth KA, Beach M, Gerrard M, Heatherton TF. Population-Based Assessment of Exposure to Risk Behaviors in Motion Pictures. *Commun Methods Meas*. 2008;2(1-2):134-51. Epub 2009/01/06.
37. Carlos HA, Shi X, Sargent J, Tanski S, Berke EM. Density estimation and adaptive bandwidths: a primer for public health practitioners. *Int J Health Geogr*. 2010;9:39. Epub 2010/07/27.
38. Shi X. Selection of bandwidth type and adjustment side in kernel density estimation over inhomogenous backgrounds. *International Journal of Geographic Information Science*. 2010;24(5):643-60.
39. Oak Ridge National Laboratory. LandScan Global Population Database. Oak Ridge, TN [4/2/11]; Available from: <http://www.ornl.gov/landscan/>.
40. Esri. Esri StreetMap Premium - Advanced Geocoding, Routing, and Cartography. Redlands, CA [4/2/11]; Available from: <http://www.esri.com/data/streetmap/index.html>.
41. Ennett ST, Foshee VA, Bauman KE, Hussong A, Faris R, Hipp JR, et al. A social contextual analysis of youth cigarette smoking development. *Nicotine Tob Res*. 2010;12(9):950-62. Epub 2010/08/07.
42. Sargent JD, Gibson J, Heatherton TF. Comparing the effects of entertainment media and tobacco marketing on youth smoking. *Tob Control*. 2009;18(1):47-53.
43. DiFranza JR, Rigotti NA, McNeill AD, Ockene JK, Savageau JA, St Cyr D, et al. Initial symptoms of nicotine dependence in adolescents. *Tob Control*. 2000;9(3):313-9.
44. DiFranza JR, Savageau JA, Fletcher K, Ockene JK, Rigotti NA, McNeill AD, et al. Measuring the loss of autonomy over nicotine use in adolescents: the DANDY (Development and Assessment of Nicotine Dependence in Youths) study. *Arch Pediatr Adolesc Med*. 2002;156(4):397-403.
45. Skara S, Sussman S, Dent CW. Predicting regular cigarette use among continuation high school students. *Am J Health Behav*. 2001;25(2):147-56. Epub 2001/04/12.
46. Zuckerman M. Behavioral expressions and biosocial bases of sensation seeking. New York: Cambridge University Press; 1994.
47. Newcomb MD, McGee L. Influence of sensation seeking on general deviance and specific problem behaviors from adolescence to young adulthood. *J Pers Soc Psychol*. 1991;61(4):614-28. Epub 1991/10/01.
48. Perkins KA, Gerlach D, Broge M, Grobe JE, Wilson A. Greater sensitivity to subjective effects of nicotine in nonsmokers high in sensation seeking. *Exp Clin Psychopharmacol*. 2000;8(4):462-71. Epub 2000/12/29.
49. Conrod PJ, Castellanos N, Mackie C. Personality-targeted interventions delay the growth of adolescent drinking and binge drinking. *J Child Psychol Psychiatry*. 2008;49(2):181-90. Epub 2008/01/24.
50. Stoolmiller M, Gerrard M, Sargent JD, Worth KA, Gibbons FX. R-rated movie viewing, growth in sensation seeking and alcohol initiation: reciprocal and moderation effects. *Prev Sci*. 2010;11(1):1-13. Epub 2009/08/06.
51. Robinson LA, Murray DM, Alfano CM, Zbikowski SM, Blitstein JL, Klesges RC. Ethnic differences in predictors of adolescent smoking onset and escalation: A longitudinal study from 7th to 12th grade. *Nicotine & Tobacco Research*. 2006;8(2):297-307.
52. Bachman JG, Wallace JM, Jr., O'Malley PM, Johnston LD, Kurth CL, Neighbors HW. Racial/Ethnic differences in smoking, drinking, and illicit drug use among American high school seniors, 1976-89. *Am J Public Health*. 1991;81(3):372-7.
53. Lewis PC, Harrell JS, Bradley C, Deng S. Cigarette use in adolescents: the Cardiovascular Health in Children and Youth Study. *ResNursHealth*. 2001;24(1):27-37.



- 1  
2  
3  
4  
5  
6  
7  
8  
9  
10  
11  
12  
13  
14  
15  
16  
17  
18  
19  
20  
21  
22  
23  
24  
25  
26  
27  
28  
29  
30  
31  
32  
33  
34  
35  
36  
37  
38  
39  
40  
41  
42  
43  
44  
45  
46  
47  
48  
49  
50  
51  
52  
53  
54  
55  
56  
57  
58  
59  
60
54. Nelson MC, Gordon-Larsen P. Physical activity and sedentary behavior patterns are associated with selected adolescent health risk behaviors. *Pediatrics*. 2006;117(4):1281-90.
55. Flint AJ, Yamada EG, Novotny TE. Black-white differences in cigarette smoking uptake: progression from adolescent experimentation to regular use. *Prev Med*. 1998;27(3):358-64.
56. Headen SW, Bauman KE, Deane GD, Koch GG. Are the correlates of cigarette smoking initiation different for black and white adolescents? *Am J Public Health*. 1991;81(7):854-8.
57. Jackson C, Brown JD, L'Engle KL. R-rated movies, bedroom televisions, and initiation of smoking by white and black adolescents. *Arch Pediatr Adolesc Med*. 2007;161(3):260-8.
58. Henriksen L, Feighery EC, Wang Y, Fortmann SP. Association of retail tobacco marketing with adolescent smoking. *Am J Public Health*. 2004;94(12):2081-3.
59. McCarthy WJ, Mistry R, Lu Y, Patel M, Zheng H, Dietsch B. Density of tobacco retailers near schools: effects on tobacco use among students. *Am J Public Health*. 2009;99(11):2006-13. Epub 2009/10/13.

## STROBE Statement—checklist of items that should be included in reports of observational studies

|                              | Item No | Recommendation                                                                                                                                                                                                                                                                                                                                                                                                                                                                                                                                                                                                                                                                                   |
|------------------------------|---------|--------------------------------------------------------------------------------------------------------------------------------------------------------------------------------------------------------------------------------------------------------------------------------------------------------------------------------------------------------------------------------------------------------------------------------------------------------------------------------------------------------------------------------------------------------------------------------------------------------------------------------------------------------------------------------------------------|
| <b>Title and abstract</b>    | 1       | (a) Indicate the study's design with a commonly used term in the title or the abstract<br>(b) Provide in the abstract an informative and balanced summary of what was done and what was found                                                                                                                                                                                                                                                                                                                                                                                                                                                                                                    |
| <b>Introduction</b>          |         |                                                                                                                                                                                                                                                                                                                                                                                                                                                                                                                                                                                                                                                                                                  |
| Background/rationale         | 2       | Explain the scientific background and rationale for the investigation being reported                                                                                                                                                                                                                                                                                                                                                                                                                                                                                                                                                                                                             |
| Objectives                   | 3       | State specific objectives, including any prespecified hypotheses                                                                                                                                                                                                                                                                                                                                                                                                                                                                                                                                                                                                                                 |
| <b>Methods</b>               |         |                                                                                                                                                                                                                                                                                                                                                                                                                                                                                                                                                                                                                                                                                                  |
| Study design                 | 4       | Present key elements of study design early in the paper                                                                                                                                                                                                                                                                                                                                                                                                                                                                                                                                                                                                                                          |
| Setting                      | 5       | Describe the setting, locations, and relevant dates, including periods of recruitment, exposure, follow-up, and data collection                                                                                                                                                                                                                                                                                                                                                                                                                                                                                                                                                                  |
| Participants                 | 6       | (a) <i>Cohort study</i> —Give the eligibility criteria, and the sources and methods of selection of participants. Describe methods of follow-up<br><i>Case-control study</i> —Give the eligibility criteria, and the sources and methods of case ascertainment and control selection. Give the rationale for the choice of cases and controls<br><i>Cross-sectional study</i> —Give the eligibility criteria, and the sources and methods of selection of participants<br>(b) <i>Cohort study</i> —For matched studies, give matching criteria and number of exposed and unexposed<br><i>Case-control study</i> —For matched studies, give matching criteria and the number of controls per case |
| Variables                    | 7       | Clearly define all outcomes, exposures, predictors, potential confounders, and effect modifiers. Give diagnostic criteria, if applicable                                                                                                                                                                                                                                                                                                                                                                                                                                                                                                                                                         |
| Data sources/<br>measurement | 8*      | For each variable of interest, give sources of data and details of methods of assessment (measurement). Describe comparability of assessment methods if there is more than one group                                                                                                                                                                                                                                                                                                                                                                                                                                                                                                             |
| Bias                         | 9       | Describe any efforts to address potential sources of bias                                                                                                                                                                                                                                                                                                                                                                                                                                                                                                                                                                                                                                        |
| Study size                   | 10      | Explain how the study size was arrived at                                                                                                                                                                                                                                                                                                                                                                                                                                                                                                                                                                                                                                                        |
| Quantitative variables       | 11      | Explain how quantitative variables were handled in the analyses. If applicable, describe which groupings were chosen and why                                                                                                                                                                                                                                                                                                                                                                                                                                                                                                                                                                     |
| Statistical methods          | 12      | (a) Describe all statistical methods, including those used to control for confounding<br>(b) Describe any methods used to examine subgroups and interactions<br>(c) Explain how missing data were addressed<br>(d) <i>Cohort study</i> —If applicable, explain how loss to follow-up was addressed<br><i>Case-control study</i> —If applicable, explain how matching of cases and controls was addressed<br><i>Cross-sectional study</i> —If applicable, describe analytical methods taking account of sampling strategy<br>(e) Describe any sensitivity analyses                                                                                                                                |

Continued on next page



**Results**

|                  |     |                                                                                                                                                                                                                                                                                                                                                                                                               |
|------------------|-----|---------------------------------------------------------------------------------------------------------------------------------------------------------------------------------------------------------------------------------------------------------------------------------------------------------------------------------------------------------------------------------------------------------------|
| Participants     | 13* | (a) Report numbers of individuals at each stage of study—eg numbers potentially eligible, examined for eligibility, confirmed eligible, included in the study, completing follow-up, and analysed<br>(b) Give reasons for non-participation at each stage<br>(c) Consider use of a flow diagram                                                                                                               |
| Descriptive data | 14* | (a) Give characteristics of study participants (eg demographic, clinical, social) and information on exposures and potential confounders<br>(b) Indicate number of participants with missing data for each variable of interest<br>(c) <i>Cohort study</i> —Summarise follow-up time (eg, average and total amount)                                                                                           |
| Outcome data     | 15* | <i>Cohort study</i> —Report numbers of outcome events or summary measures over time<br><i>Case-control study</i> —Report numbers in each exposure category, or summary measures of exposure<br><i>Cross-sectional study</i> —Report numbers of outcome events or summary measures                                                                                                                             |
| Main results     | 16  | (a) Give unadjusted estimates and, if applicable, confounder-adjusted estimates and their precision (eg, 95% confidence interval). Make clear which confounders were adjusted for and why they were included<br>(b) Report category boundaries when continuous variables were categorized<br>(c) If relevant, consider translating estimates of relative risk into absolute risk for a meaningful time period |
| Other analyses   | 17  | Report other analyses done—eg analyses of subgroups and interactions, and sensitivity analyses                                                                                                                                                                                                                                                                                                                |

**Discussion**

|                  |    |                                                                                                                                                                            |
|------------------|----|----------------------------------------------------------------------------------------------------------------------------------------------------------------------------|
| Key results      | 18 | Summarise key results with reference to study objectives                                                                                                                   |
| Limitations      | 19 | Discuss limitations of the study, taking into account sources of potential bias or imprecision. Discuss both direction and magnitude of any potential bias                 |
| Interpretation   | 20 | Give a cautious overall interpretation of results considering objectives, limitations, multiplicity of analyses, results from similar studies, and other relevant evidence |
| Generalisability | 21 | Discuss the generalisability (external validity) of the study results                                                                                                      |

**Other information**

|         |    |                                                                                                                                                               |
|---------|----|---------------------------------------------------------------------------------------------------------------------------------------------------------------|
| Funding | 22 | Give the source of funding and the role of the funders for the present study and, if applicable, for the original study on which the present article is based |
|---------|----|---------------------------------------------------------------------------------------------------------------------------------------------------------------|

\*Give information separately for cases and controls in case-control studies and, if applicable, for exposed and unexposed groups in cohort and cross-sectional studies.

**Note:** An Explanation and Elaboration article discusses each checklist item and gives methodological background and published examples of transparent reporting. The STROBE checklist is best used in conjunction with this article (freely available on the Web sites of PLoS Medicine at <http://www.plosmedicine.org/>, Annals of Internal Medicine at <http://www.annals.org/>, and Epidemiology at <http://www.epidem.com/>). Information on the STROBE Initiative is available at [www.strobe-statement.org](http://www.strobe-statement.org).
